# Supplementary material for: A Novel Collection of snRNA-Like Promoters with Tissue-Specific Transcription Properties
Source: PubMed Central journal article supplement (PMC3472747; doi:10.3390/ijms130911323), 2012-09-11
Supplement: ijms-13-11323-s003.pdf [file ijms-13-11323-s003.pdf]

## Supplementary data S1

| Chr              | Base number (GENOME ASSEMBLY: genome browser hg17) | Score | Gene      | Gene orientation | Position     | Dir.  | AS | Distance                                  |                                              |
|------------------|----------------------------------------------------|-------|-----------|------------------|--------------|-------|----|-------------------------------------------|----------------------------------------------|
|                  |                                                    |       |           |                  |              |       |    | Last nucleotide PSE/First nucleotide TATA | Last nucleotide PSE/First nucleotide Poly(T) |
| 1<br>302 results | 6355765                                            | 1,52  | ACOT7     | 3'-5'            | 11           | 5'-3' | ok | 51                                        | 298                                          |
|                  | 7381569                                            | 2,585 | CAMTA1    | 5'-3'            | 15           | 5'-3' | no | 32                                        | 381                                          |
|                  | 7757057                                            | 2,135 | VAMP3     | 5'-3'            | 12           | 5'-3' | no | 25                                        | 457                                          |
|                  | 7932262                                            | 2,305 |           |                  |              | 5'-3' |    | 34                                        | 513                                          |
|                  | 10592609                                           | 2,53  | PEX14     | 5'-3'            | 14           | 5'-3' | no | 37                                        | 458                                          |
|                  | 11790002                                           | 2,43  | CLCN6     | 5'-3'            | 11           | 5'-3' | no | 31                                        | 458                                          |
|                  | 21348761                                           | 1,485 | EIF4G3    | 3'-5'            | 12           | 5'-3' | ok | 17                                        | 507                                          |
|                  | 23211613                                           | 2,24  |           |                  |              | 5'-3' |    | 41                                        | 342                                          |
|                  | 24937294                                           | 2,16  |           |                  |              | 5'-3' |    | 42                                        | 482                                          |
|                  | 31401210                                           | 2,47  |           |                  |              | 5'-3' |    | 31                                        | 368                                          |
|                  | 32277267                                           | 1,705 | KHDRBS1   | 5'-3'            | 17 E 8   8   | 5'-3' | no | 49                                        | 315                                          |
|                  | 35785118                                           | 2,39  | KIAA0319L | 3'-5'            | 12           | 5'-3' | ok | 34                                        | 322                                          |
|                  | 38649240                                           | 2,69  |           |                  |              | 5'-3' |    | 38                                        | 402                                          |
|                  | 40362445                                           | 2,475 |           |                  |              | 5'-3' |    | 40                                        | 379                                          |
|                  | 42726347                                           | 2,17  |           |                  |              | 5'-3' |    | 21                                        | 408                                          |
|                  | 46304025                                           | 1,82  | PIK3R3    | 3'-5'            | 15 E 5   4   | 5'-3' | ok | 16                                        | 388                                          |
|                  | 46346418                                           | 1,855 | PIK3R3    | 3'-5'            | 11           | 5'-3' | ok | 19                                        | 365                                          |
|                  | 48958923                                           | 1,885 | AGBL4     | 3'-5'            | 12           | 5'-3' | ok | 44                                        | 517                                          |
|                  | 50059740                                           | 2,175 |           |                  |              | 5'-3' |    | 49                                        | 409                                          |
|                  | 50919216                                           | 2,74  | FAF1      | 3'-5'            | 17           | 5'-3' | ok | 33                                        | 402                                          |
|                  | 50936234                                           | 2,53  | FAF1      | 3'-5'            | 17           | 5'-3' | ok | 39                                        | 380                                          |
|                  | 51403114                                           | 2,245 |           |                  |              | 5'-3' |    | 42                                        | 353                                          |
|                  | 51641249                                           | 2,715 | EPS15     | 3'-5'            | 17 E 18   18 | 5'-3' | ok | 32                                        | 411                                          |
|                  | 56265461                                           | 2,165 |           |                  |              | 5'-3' |    | 29                                        | 491                                          |
|                  | 66148161                                           | 2,43  | PDE4B     | 5'-3'            | 11           | 5'-3' | no | 28                                        | 428                                          |
|                  | 66161132                                           | 1,96  | PDE4B     | 5'-3'            | 13           | 5'-3' | no | 51                                        | 386                                          |
|                  | 67072257                                           | 2,015 | WDR78     | 3'-5'            | E 12   11    | 5'-3' | ok | 49                                        | 441                                          |
|                  | 67096433                                           | 1,935 | WDR78     | 3'-5'            | 17           | 5'-3' | ok | 21                                        | 457                                          |

|           |       |          |       |             |       |    |    |     |
|-----------|-------|----------|-------|-------------|-------|----|----|-----|
| 67296911  | 2,475 |          |       |             | 5'-3' |    | 31 | 449 |
| 67552721  | 2,09  | IL12RB2  | 5'-3' | 1 1         | 5'-3' | no | 20 | 402 |
| 68979970  | 2,535 |          |       |             | 5'-3' |    | 38 | 447 |
| 69293375  | 1,855 |          |       |             | 5'-3' |    | 38 | 583 |
| 72494806  | 1,965 | NEGR1    | 3'-5' | 1 1         | 5'-3' | ok | 22 | 461 |
| 73722042  | 2,66  |          |       |             | 5'-3' |    | 35 | 366 |
| 73810293  | 2,215 |          |       |             | 5'-3' |    | 47 | 397 |
| 75262583  | 2,755 |          |       |             | 5'-3' |    | 37 | 405 |
| 75865409  | 2,335 |          |       |             | 5'-3' |    | 43 | 381 |
| 76125233  | 2,76  | MSH4     | 5'-3' | 1 15        | 5'-3' | no | 36 | 422 |
| 78276500  | 1,915 |          |       |             | 5'-3' |    | 50 | 367 |
| 78362057  | 1,99  | GIPC2    | 5'-3' | 1 4         | 5'-3' | no | 20 | 436 |
| 80004607  | 2,59  |          |       |             | 5'-3' |    | 38 | 436 |
| 80268439  | 2,665 |          |       |             | 5'-3' |    | 38 | 397 |
| 80798725  | 2,51  |          |       |             | 5'-3' |    | 41 | 396 |
| 83371072  | 2,2   |          |       |             | 5'-3' |    | 28 | 474 |
| 84912427  | 2,745 | SSX2IP   | 3'-5' | 1 2         | 5'-3' | ok | 37 | 403 |
| 87583455  | 2,1   | LMO4     | 5'-3' | E 5         | 5'-3' | no | 20 | 414 |
| 88031736  | 2,355 |          |       |             | 5'-3' |    | 45 | 413 |
| 89011313  | 2,425 | PKN2     | 5'-3' | 1 6         | 5'-3' | no | 27 | 419 |
| 89385833  | 1,805 | GBP7     | 3'-5' | E 8 1 7     | 5'-3' | ok | 20 | 345 |
| 89419023  | 2,785 |          |       |             | 5'-3' |    | 36 | 401 |
| 89426848  | 1,885 | GBP4     | 3'-5' | E 8 1 7     | 5'-3' | ok | 20 | 457 |
| 89975820  | 1,97  |          |       |             | 5'-3' |    | 47 | 348 |
| 90048898  | 2,245 |          |       |             | 5'-3' |    | 45 | 435 |
| 93000533  | 2,295 | EVI5     | 3'-5' | 1 1         | 5'-3' | ok | 24 | 403 |
| 94113366  | 2,74  | DNTTIP2  | 3'-5' | 1 3 E 3 1 2 | 5'-3' | ok | 33 | 416 |
| 94425411  | 2,52  | ARHGAP29 | 3'-5' | 1 15        | 5'-3' | ok | 42 | 408 |
| 95176018  | 2,375 |          |       |             | 5'-3' |    | 42 | 379 |
| 96022022  | 2,24  |          |       |             | 5'-3' |    | 30 | 486 |
| 98235705  | 1,47  |          |       |             | 5'-3' |    | 48 | 258 |
| 98419516  | 2,605 |          |       |             | 5'-3' |    | 33 | 443 |
| 98613912  | 2,16  |          |       |             | 5'-3' |    | 23 | 386 |
| 101644098 | 2,24  |          |       |             | 5'-3' |    | 42 | 466 |
| 102454863 | 2,26  |          |       |             | 5'-3' |    | 45 | 432 |
| 102746960 | 2,2   |          |       |             | 5'-3' |    | 34 | 534 |
| 103190036 | 2,09  | COL11A1  | 3'-5' | 1 41        | 5'-3' | ok | 23 | 372 |
| 103238865 | 1,48  | COL11A1  | 3'-5' | 1 24        | 5'-3' | ok | 22 | 558 |
| 105732777 | 2,545 |          |       |             | 5'-3' |    | 31 | 435 |
| 105994330 | 2,48  |          |       |             | 5'-3' |    | 41 | 428 |

|           |       |          |       |    |       |    |    |     |
|-----------|-------|----------|-------|----|-------|----|----|-----|
| 106142369 | 2,315 |          |       |    | 5'-3' |    | 46 | 411 |
| 107411725 | 2,495 |          |       |    | 5'-3' |    | 42 | 403 |
| 107988212 | 2,535 | VAV3     | 3'-5' | 19 | 5'-3' | ok | 41 | 417 |
| 108227886 | 2,095 | VAV3     | 3'-5' | 1  | 5'-3' | ok | 43 | 333 |
| 113636227 | 1,935 |          |       |    | 5'-3' |    | 43 | 517 |
| 114374108 | 2,135 |          |       |    | 5'-3' |    | 40 | 311 |
| 118178082 | 2,705 |          |       |    | 5'-3' |    | 38 | 405 |
| 119656744 | 1,985 |          |       |    | 5'-3' |    | 48 | 457 |
| 142339433 | 2,44  |          |       |    | 5'-3' |    | 40 | 372 |
| 144518438 | 1,365 | GPR89A   | 5'-3' | 5  | 5'-3' | no | 16 | 521 |
| 145614614 | 2,655 |          |       |    | 5'-3' |    | 37 | 385 |
| 148347701 | 2,29  | VPS45    | 5'-3' | 13 | 5'-3' | no | 24 | 402 |
| 149455583 | 2,625 | PIP5K1A  | 5'-3' | 1  | 5'-3' | no | 30 | 409 |
| 157650570 | 2,1   |          |       |    | 5'-3' |    | 21 | 424 |
| 158086596 | 1,76  |          |       |    | 5'-3' |    | 22 | 502 |
| 161307561 | 1,935 | RGS4     | 5'-3' | 1  | 5'-3' | no | 19 | 381 |
| 162891828 | 2,015 | PBX1     | 5'-3' | 2  | 5'-3' | no | 18 | 407 |
| 163119348 | 2,03  |          |       |    | 5'-3' |    | 46 | 350 |
| 163293570 | 2,215 |          |       |    | 5'-3' |    | 30 | 327 |
| 165464688 | 2,48  | POU2F1   | 5'-3' | 1  | 5'-3' | no | 28 | 418 |
| 165618445 | 1,83  | POU2F1   | 5'-3' | 8  | 5'-3' | no | 19 | 458 |
| 168070952 | 2,85  | C1orf112 | 5'-3' | 16 | 5'-3' | no | 35 | 404 |
| 169656768 | 2,02  |          |       |    | 5'-3' |    | 18 | 410 |
| 172844824 | 2,075 | RABGAP1L | 5'-3' | 13 | 5'-3' | no | 39 | 529 |
| 174956011 | 2,195 | PAPPA2   | 5'-3' | 12 | 5'-3' | no | 34 | 283 |
| 175741104 | 2,43  |          |       |    | 5'-3' |    | 37 | 478 |
| 175786228 | 2,025 |          |       |    | 5'-3' |    | 33 | 559 |
| 175902859 | 2,195 |          |       |    | 5'-3' |    | 23 | 393 |
| 178871895 | 2,01  | XPR1     | 5'-3' | 1  | 5'-3' | no | 19 | 396 |
| 180886654 | 2,35  | RGS8     | 3'-5' | 4  | 5'-3' | ok | 30 | 464 |
| 181848577 | 1,24  |          |       |    | 5'-3' |    | 19 | 242 |
| 185222696 | 1,505 | RGS8     | 3'-5' | 17 | 5'-3' | ok | 44 | 593 |
| 185735351 | 1,615 |          |       |    | 5'-3' |    | 24 | 551 |
| 186212600 | 2,01  |          |       |    | 5'-3' |    | 49 | 376 |
| 187000231 | 2,565 |          |       |    | 5'-3' |    | 30 | 397 |
| 189701877 | 2,1   |          |       |    | 5'-3' |    | 22 | 434 |
| 192376106 | 1,345 |          |       |    | 5'-3' |    | 24 | 213 |
| 194746175 | 2,26  | KCNT2    | 3'-5' | 1  | 5'-3' | ok | 26 | 442 |
| 195965174 | 2,385 | DENND1B  | 3'-5' | 3  | 5'-3' | ok | 31 | 351 |
| 195978018 | 1,85  | DENND1B  | 3'-5' | 2  | 5'-3' | ok | 24 | 314 |

|           |       |         |       |     |       |    |    |     |
|-----------|-------|---------|-------|-----|-------|----|----|-----|
| 197685777 | 2,375 |         |       |     | 5'-3' |    | 40 | 359 |
| 198018488 | 2,78  |         |       |     | 5'-3' |    | 35 | 390 |
| 198343732 | 1,9   | NR5A2   | 5'-3' | 14  | 5'-3' | no | 16 | 414 |
| 200079957 | 2,35  | IPO9    | 5'-3' | 11  | 5'-3' | no | 43 | 434 |
| 202427164 | 2,09  | KISS1   | 3'-5' | 12  | 5'-3' | ok | 23 | 446 |
| 205693473 | 2,27  |         |       |     | 5'-3' |    | 46 | 398 |
| 207350614 | 2,335 |         |       |     | 5'-3' |    | 44 | 427 |
| 208242069 | 2,215 | SYT14   | 5'-3' | 12  | 5'-3' | no | 23 | 421 |
| 209442714 | 2,465 |         |       |     | 5'-3' |    | 42 | 421 |
| 212017509 | 1,465 |         |       |     | 5'-3' |    | 22 | 257 |
| 216912955 | 1,67  |         |       |     | 5'-3' |    | 23 | 530 |
| 217433524 | 2,205 | LYPLAL1 | 5'-3' | 13  | 5'-3' | no | 39 | 315 |
| 220462522 | 1,905 |         |       |     | 5'-3' |    | 19 | 375 |
| 222115687 | 2,755 |         |       |     | 5'-3' |    | 34 | 423 |
| 223178838 | 2,82  |         |       |     | 5'-3' |    | 34 | 408 |
| 223284973 | 2,39  |         |       |     | 5'-3' |    | 26 | 402 |
| 224198241 | 2,06  |         |       |     | 5'-3' |    | 33 | 266 |
| 229300693 | 2,11  |         |       |     | 5'-3' |    | 47 | 442 |
| 229802272 | 2,03  |         |       |     | 5'-3' |    | 49 | 438 |
| 236703124 | 1,935 |         |       |     | 5'-3' |    | 26 | 507 |
| 236878325 | 2,325 |         |       |     | 5'-3' |    | 42 | 369 |
| 239029395 | 2,06  | RGS7    | 3'-5' | 117 | 5'-3' | ok | 49 | 432 |
| 239591362 | 2,35  |         |       |     | 5'-3' |    | 25 | 414 |
| 239700648 | 2,355 |         |       |     | 5'-3' |    | 28 | 443 |
| 241424881 | 1,81  | CEP170  | 3'-5' | 16  | 5'-3' | ok | 22 | 492 |
| 241599945 | 2,24  | SDCCAG8 | 5'-3' | 112 | 5'-3' | no | 45 | 382 |
| 242396556 | 2,345 |         |       |     | 5'-3' |    | 28 | 373 |
| 244374336 | 2,16  | SMYD3   | 3'-5' | 15  | 5'-3' | ok | 31 | 306 |
| 246737527 | 1,915 |         |       |     | 5'-3' |    | 21 | 357 |
| 2042254   | 2,265 | PRKCZ   | 5'-3' | 11  | 3'-5' | ok | 24 | 397 |
| 5279019   | 2,735 |         |       |     | 3'-5' |    | 36 | 427 |
| 12538241  | 2,54  |         |       |     | 3'-5' |    | 30 | 392 |
| 13382877  | 2,745 |         |       |     | 3'-5' |    | 36 | 393 |
| 13603707  | 2,745 |         |       |     | 3'-5' |    | 36 | 393 |
| 20636128  | 2,74  |         |       |     | 3'-5' |    | 37 | 402 |
| 25040563  | 2,41  | CLIC4   | 5'-3' | E 6 | 3'-5' | ok | 33 | 482 |
| 28752839  | 2,2   | TRSPAP1 | 5'-3' | 12  | 3'-5' | ok | 31 | 504 |
| 31188917  | 2,135 | PUM1    | 3'-5' | 118 | 3'-5' | no | 24 | 447 |
| 31766276  | 1,765 |         |       |     | 3'-5' |    | 54 | 441 |
| 32376879  | 1,245 | KPNA6   | 5'-3' | 11  | 3'-5' | ok | 51 | 575 |

|          |       |            |       |             |       |    |    |     |
|----------|-------|------------|-------|-------------|-------|----|----|-----|
| 33262324 | 1,9   | AK2        | 3'-5' | I 2 E 2 I 1 | 3'-5' | no | 28 | 534 |
| 33555612 | 2,44  | A3GALT2    | 3'-5' | I 1         | 3'-5' | no | 29 | 382 |
| 33780070 | 2,435 | CSMD2      | 3'-5' | I 57        | 3'-5' | no | 40 | 447 |
| 42595578 | 2,62  |            |       |             | 3'-5' |    | 32 | 388 |
| 43295325 | 2,445 |            |       |             | 3'-5' |    | 32 | 465 |
| 43295404 | 1,35  |            |       |             | 3'-5' |    | 52 | 544 |
| 45704795 | 2,26  | TESK2      | 3'-5' | I 1         | 3'-5' | no | 43 | 452 |
| 47403525 | 2,3   |            |       |             | 3'-5' |    | 45 | 394 |
| 49507401 | 2,25  |            |       |             | 3'-5' |    | 23 | 404 |
| 50968928 | 2,28  | FAF1       | 3'-5' | I 6         | 3'-5' | no | 31 | 330 |
| 52797787 | 2,405 |            |       |             | 3'-5' |    | 26 | 405 |
| 52894173 | 2,715 | MGC52498   | 3'-5' | I 2         | 3'-5' | no | 32 | 407 |
| 58502081 | 2,245 |            |       |             | 3'-5' |    | 27 | 363 |
| 58798279 | 2,6   |            |       |             | 3'-5' |    | 31 | 424 |
| 60016844 | 2,39  |            |       |             | 3'-5' |    | 40 | 362 |
| 60758655 | 2,155 |            |       |             | 3'-5' |    | 45 | 365 |
| 62155335 | 1,565 | INADL      | 5'-3' | I 26        | 3'-5' | ok | 20 | 521 |
| 62721888 | 1,98  | DOCK7      | 3'-5' | I 42        | 3'-5' | no | 27 | 310 |
| 63536191 | 2,435 |            |       |             | 3'-5' |    | 27 | 417 |
| 65069974 | 2,395 | RAVER2     | 5'-3' | E 12        | 3'-5' | ok | 40 | 363 |
| 66443088 | 1,915 | PDE4B      | 5'-3' | I 1         | 3'-5' | ok | 46 | 327 |
| 68647775 | 2,155 |            |       |             | 3'-5' |    | 25 | 453 |
| 69666539 | 2,185 |            |       |             | 3'-5' |    | 27 | 467 |
| 70269113 | 1,705 | LRRC7      | 5'-3' | I 16        | 3'-5' | ok | 25 | 543 |
| 71290443 | 2,195 |            |       |             | 3'-5' |    | 47 | 425 |
| 71964919 | 2,27  | NEGR1      | 3'-5' | I 3         | 3'-5' | no | 25 | 388 |
| 73430290 | 2,875 |            |       |             | 3'-5' |    | 35 | 409 |
| 74039954 | 2,785 |            |       |             | 3'-5' |    | 34 | 401 |
| 74151612 | 2,25  |            |       |             | 3'-5' |    | 33 | 514 |
| 74836339 | 2,48  | C1orf173   | 3'-5' | I 11        | 3'-5' | no | 42 | 400 |
| 75264764 | 2,665 |            |       |             | 3'-5' |    | 39 | 411 |
| 76842780 | 1,775 | ST6GALNAC3 | 5'-3' | I 3         | 3'-5' | ok | 17 | 369 |
| 78558951 | 1,76  |            |       |             | 3'-5' |    | 20 | 336 |
| 79070812 | 1,46  |            |       |             | 3'-5' |    | 44 | 216 |
| 79562332 | 2,43  |            |       |             | 3'-5' |    | 29 | 438 |
| 79704627 | 1,84  |            |       |             | 3'-5' |    | 53 | 436 |
| 80053760 | 1,845 |            |       |             | 3'-5' |    | 19 | 455 |
| 81940473 | 1,965 |            |       |             | 3'-5' |    | 19 | 431 |
| 82852681 | 2,515 |            |       |             | 3'-5' |    | 41 | 421 |
| 84840786 | 1,985 |            |       |             | 3'-5' |    | 30 | 537 |

|                  |              |               |              |            |  |              |    |           |            |
|------------------|--------------|---------------|--------------|------------|--|--------------|----|-----------|------------|
| 84849373         | 2,05         |               |              |            |  | 3'-5'        |    | 30        | 524        |
| 86083921         | 2,295        | COL24A1       | 3'-5'        | 39         |  | 3'-5'        | no | 46        | 403        |
| 87146119         | 2,06         | SEP15         | 3'-5'        | 1          |  | 3'-5'        | no | 23        | 452        |
| 88207236         | 2,25         |               |              |            |  | 3'-5'        |    | 32        | 504        |
| 88592591         | 2,635        |               |              |            |  | 3'-5'        |    | 39        | 401        |
| 90045617         | 2,13         |               |              |            |  | 3'-5'        |    | 44        | 468        |
| 90287995         | 1,93         |               |              |            |  | 3'-5'        |    | 29        | 538        |
| 91223833         | 1,71         | ZNF644        | 3'-5'        | 1          |  | 3'-5'        | no | 23        | 296        |
| 92177508         | 1,85         |               |              |            |  | 3'-5'        |    | 46        | 504        |
| 93433752         | 1,38         | CCDC18        | 5'-3'        | 6          |  | 3'-5'        | ok | 51        | 270        |
| <b>94341472</b>  | <b>1,49</b>  | <b>ABCA4</b>  | <b>3'-5'</b> | <b>  4</b> |  | <b>3'-5'</b> | no | <b>24</b> | <b>576</b> |
| 94423584         | 1,875        | ARHGAP29      | 3'-5'        | E 15   16  |  | 3'-5'        | no | 17        | 389        |
| 95093651         | 1,74         | SLC44A3       | 5'-3'        | 8          |  | 3'-5'        | ok | 22        | 506        |
| 95199584         | 2,01         |               |              |            |  | 3'-5'        |    | 23        | 462        |
| 97607436         | 1,72         | DPYD          | 3'-5'        | 16         |  | 3'-5'        | no | 20        | 328        |
| 98442090         | 2,445        |               |              |            |  | 3'-5'        |    | 42        | 425        |
| 99271749         | 2,625        |               |              |            |  | 3'-5'        |    | 33        | 379        |
| 105023346        | 2,255        |               |              |            |  | 3'-5'        |    | 27        | 453        |
| 105094502        | 2,5          |               |              |            |  | 3'-5'        |    | 28        | 404        |
| 105480660        | 1,95         |               |              |            |  | 3'-5'        |    | 27        | 304        |
| 105704127        | 2,275        |               |              |            |  | 3'-5'        |    | 43        | 369        |
| 106248303        | 2,265        |               |              |            |  | 3'-5'        |    | 47        | 407        |
| 106802057        | 1,605        |               |              |            |  | 3'-5'        |    | 49        | 295        |
| 107811591        | 2,195        | NTNG1         | 5'-3'        | 5          |  | 3'-5'        | ok | 41        | 333        |
| 108093823        | 2,09         | VAV3          | 3'-5'        | 13         |  | 3'-5'        | no | 23        | 446        |
| 111549811        | 2,48         |               |              |            |  | 3'-5'        |    | 38        | 360        |
| 112154844        | 2,035        | KCND3         | 3'-5'        | 2          |  | 3'-5'        | no | 19        | 401        |
| 112378587        | 2,565        |               |              |            |  | 3'-5'        |    | 33        | 451        |
| 113165755        | 2,13         |               |              |            |  | 3'-5'        |    | 40        | 310        |
| 117381555        | 1,92         |               |              |            |  | 3'-5'        |    | 22        | 348        |
| <b>117733853</b> | <b>1,785</b> | <b>MAN1A2</b> | <b>5'-3'</b> | <b>  1</b> |  | <b>3'-5'</b> | ok | <b>28</b> | <b>261</b> |
| 119219722        | 2,265        |               |              |            |  | 3'-5'        |    | 47        | 411        |
| 143646917        | 2,225        | PDE4DIP       | 3'-5'        | 5          |  | 3'-5'        | no | 43        | 359        |
| 145209646        | 2,14         | CHD1L         | 5'-3'        | 11         |  | 3'-5'        | ok | 22        | 392        |
| 145886471        | 1,365        | GPR89B        | 5'-3'        | 5          |  | 3'-5'        | ok | 16        | 521        |
| 148560687        | 2,33         | PRPF3         | 5'-3'        | 1          |  | 3'-5'        | ok | 41        | 360        |
| 152130794        | 2,005        | GATAD2B       | 3'-5'        | 1          |  | 3'-5'        | no | 21        | 443        |
| 159417984        | 1,945        |               |              |            |  | 3'-5'        |    | 25        | 495        |
| 160999923        | 2,28         | DDR2          | 5'-3'        | 10         |  | 3'-5'        | ok | 26        | 438        |
| 161397038        | 2,005        | RGS5          | 3'-5'        | 3          |  | 3'-5'        | no | 43        | 315        |

|           |       |          |       |            |       |    |    |     |
|-----------|-------|----------|-------|------------|-------|----|----|-----|
| 161851650 | 1,555 |          |       |            | 3'-5' |    | 52 | 503 |
| 162290057 | 1,725 |          |       |            | 3'-5' |    | 53 | 459 |
| 162638556 | 1,92  |          |       |            | 3'-5' |    | 54 | 408 |
| 166576146 | 2,175 |          |       |            | 3'-5' |    | 39 | 509 |
| 167620866 | 2,35  | BLZF1    | 5'-3' | 16         | 3'-5' | ok | 41 | 364 |
| 168270960 | 2,42  | KIFAP3   | 3'-5' | 16 E 6   5 | 3'-5' | no | 40 | 450 |
| 168814428 | 1,495 |          |       |            | 3'-5' |    | 48 | 555 |
| 170611250 | 2,11  | DNM3     | 5'-3' | 17         | 3'-5' | ok | 46 | 366 |
| 171757558 | 2,345 | SLC9A11  | 3'-5' | 121        | 3'-5' | no | 32 | 333 |
| 172230159 | 2,64  |          |       |            | 3'-5' |    | 34 | 372 |
| 172870770 | 2,22  | RABGAP1L | 5'-3' | 13         | 3'-5' | ok | 26 | 368 |
| 174122195 | 2,325 |          |       |            | 3'-5' |    | 28 | 369 |
| 174534115 | 2,315 |          |       |            | 3'-5' |    | 40 | 471 |
| 175375890 | 1,91  | ASTN1    | 3'-5' | 11         | 3'-5' | no | 24 | 492 |
| 175837578 | 1,22  |          |       |            | 3'-5' |    | 20 | 228 |
| 176192020 | 2,58  | SEC16B   | 3'-5' | 110        | 3'-5' | no | 30 | 400 |
| 179821608 | 2,725 | CACNA1E  | 5'-3' | 16         | 3'-5' | ok | 38 | 409 |
| 180103955 | 2,12  |          |       |            | 3'-5' |    | 24 | 450 |
| 180431963 | 2,16  |          |       |            | 3'-5' |    | 21 | 406 |
| 182701815 | 1,385 | C1orf21  | 5'-3' | 11         | 3'-5' | ok | 49 | 567 |
| 183540280 | 2,21  | IVNS1ABP | 3'-5' | 18         | 3'-5' | no | 32 | 512 |
| 184952249 | 2,11  |          |       |            | 3'-5' |    | 50 | 406 |
| 185516856 | 2,3   |          |       |            | 3'-5' |    | 37 | 314 |
| 186265520 | 2,22  |          |       |            | 3'-5' |    | 26 | 450 |
| 187332624 | 2,645 |          |       |            | 3'-5' |    | 39 | 415 |
| 187352423 | 2,04  |          |       |            | 3'-5' |    | 27 | 496 |
| 187463551 | 2,435 |          |       |            | 3'-5' |    | 36 | 331 |
| 187903818 | 2,08  |          |       |            | 3'-5' |    | 47 | 448 |
| 189077045 | 1,88  |          |       |            | 3'-5' |    | 53 | 428 |
| 190070812 | 2,8   |          |       |            | 3'-5' |    | 36 | 414 |
| 193263754 | 2,08  |          |       |            | 3'-5' |    | 44 | 478 |
| 194293424 | 2,34  |          |       |            | 3'-5' |    | 32 | 486 |
| 195194521 | 2,065 | CFHR2    | 5'-3' | 14 E 5     | 3'-5' | ok | 49 | 431 |
| 195202911 | 2,235 |          |       |            | 3'-5' |    | 33 | 301 |
| 195797632 | 2,075 | DENND1B  | 3'-5' | 15         | 3'-5' | no | 41 | 309 |
| 196730827 | 2,315 |          |       |            | 3'-5' |    | 46 | 407 |
| 197609930 | 2,41  |          |       |            | 3'-5' |    | 26 | 406 |
| 197805183 | 1,84  |          |       |            | 3'-5' |    | 20 | 352 |
| 200390282 | 2,15  | PTPN7    | 3'-5' | 15         | 3'-5' | no | 21 | 414 |
| 200616043 | 2,035 | PPP1R12B | 5'-3' | 11         | 3'-5' | ok | 48 | 447 |

|                  |              |              |              |               |              |            |              |               |
|------------------|--------------|--------------|--------------|---------------|--------------|------------|--------------|---------------|
| 201571853        | 2,05         |              |              |               | 3'-5'        |            | 47           | 454           |
| 202073481        | 2,185        | ZC3H11A      | 5'-3'        | I 9 E 10 I 10 | 3'-5'        | ok         | 37           | 291           |
| 202247422        | 2,23         |              |              |               | 3'-5'        |            | 42           | 350           |
| 207075408        | 2,805        |              |              |               | 3'-5'        |            | 34           | 405           |
| <b>209221620</b> | <b>1,965</b> | <b>KCNH1</b> | <b>3'-5'</b> | <b>I 6</b>    | <b>3'-5'</b> | no         | <b>18</b>    | <b>421</b>    |
| 209384137        | 1,95         |              |              |               | 3'-5'        |            | 51           | 384           |
| 211223367        | 2,48         | VASH2        | 5'-3'        | I 5           | 3'-5'        | ok         | 30           | 380           |
| 211337157        | 1,89         | RPS6KC1      | 5'-3'        | I 3           | 3'-5'        | ok         | 53           | 392           |
| 214167236        | 2,31         | USH2A        | 3'-5'        | I 38          | 3'-5'        | no         | 41           | 462           |
| 214518150        | 2,06         | USH2A        | 3'-5'        | I 11          | 3'-5'        | no         | 34           | 562           |
| 216699503        | 1,9          |              |              |               | 3'-5'        |            | 52           | 434           |
| 217258004        | 2,09         |              |              |               | 3'-5'        |            | 46           | 362           |
| 219940735        | 2,425        |              |              |               | 3'-5'        |            | 37           | 479           |
| 220401972        | 1,925        |              |              |               | 3'-5'        |            | 54           | 409           |
| 220898720        | 2,565        | MIA3         | 5'-3'        | E 19 I 19     | 3'-5'        | ok         | 30           | 421           |
| 221629614        | 2,115        |              |              |               | 3'-5'        |            | 44           | 471           |
| 222055076        | 1,94         | TP53BP2      | 3'-5'        | E 10 I 9      | 3'-5'        | no         | 53           | 416           |
| 223210880        | 1,695        | C1orf67      | 5'-3'        | I 3           | 3'-5'        | ok         | 47           | 293           |
| 223770053        | 1,845        | ENAH         | 3'-5'        | I 6           | 3'-5'        | no         | 51           | 363           |
| 225852133        | 2,18         | ZNF678       | 5'-3'        | I 1           | 3'-5'        | ok         | 23           | 428           |
| 227179568        | 1,5          |              |              |               | 3'-5'        |            | 23           | 564           |
| 228737718        | 2,105        |              |              |               | 3'-5'        |            | 22           | 385           |
| 230685247        | 2,275        | SIPA1L2      | 3'-5'        | I 4           | 3'-5'        | no         | 25           | 429           |
| 232459387        | 2,79         | SLC35F3      | 5'-3'        | I 3           | 3'-5'        | ok         | 36           | 416           |
| 235555353        | 2,19         | RYR2         | 5'-3'        | I 2           | 3'-5'        | ok         | 27           | 352           |
| 236037071        | 1,76         | RYR2         | 5'-3'        | I 99          | 3'-5'        | ok         | 19           | 472           |
| 237588888        | 1,945        |              |              |               | 3'-5'        |            | 19           | 435           |
| 238198567        | 2,105        |              |              |               | 3'-5'        |            | 23           | 443           |
| 240600567        | 2,135        | PLD5         | 3'-5'        | I 2           | 3'-5'        | no         | 24           | 447           |
| 241457515        | 2,785        | CEP170       | 3'-5'        | I 1           | 3'-5'        | no         | 36           | 417           |
| 246106980        | 1,805        | TRIM58       | 5'-3'        | E 6           | 3'-5'        | ok         | 28           | 553           |
| 246193181        | 1,945        | OR2L13       | 5'-3'        | I 1           | 3'-5'        | ok         | 45           | 323           |
| 246769758        | 1,915        |              |              |               | 3'-5'        |            | 21           | 357           |
| 246856699        | 2,345        | OR2T11       | 3'-5'        | E 1           | 3'-5'        | no         | 30           | 465           |
|                  |              |              | <b>63</b>    |               |              | <b>131</b> | <b>33,92</b> | <b>414,65</b> |
|                  |              |              | <b>68</b>    |               |              | <b>65</b>  | <b>31,65</b> | <b>414,37</b> |
|                  |              |              | <b>131</b>   |               |              | <b>66</b>  | <b>35,65</b> | <b>414,85</b> |

Ø



|                  |          |       |          |                     |             |       |    |     |     |
|------------------|----------|-------|----------|---------------------|-------------|-------|----|-----|-----|
| 2<br>350 results | 3427633  | 2,24  | TTC15    | 5'-3'               | 1 6         | 5'-3' | no | 37  | 302 |
|                  | 5157819  | 2,525 |          |                     |             | 5'-3' |    | 39  | 439 |
|                  | 9596480  | 2,25  | ADAM17   | 3'-5'               | 1 16        | 5'-3' | ok | 26  | 374 |
|                  | 9974260  | 1,745 | TAF1B    | 5'-3'               | 1 12        | 5'-3' | no | 21  | 323 |
|                  | 11292458 | 2,19  | ROCK2    | 3'-5'               | 1 5         | 5'-3' | ok | 48  | 416 |
|                  | 13261328 | 2,205 |          |                     |             | 5'-3' |    | 47  | 395 |
|                  | 13311634 | 2,42  |          |                     |             | 5'-3' |    | 41  | 440 |
|                  | 14121185 | 2,555 |          |                     |             | 5'-3' |    | 38  | 443 |
|                  | 16622167 | 2,16  | FAM49A   | 3'-5'               | 1 3         | 5'-3' | ok | 45  | 366 |
|                  | 17064812 | 2,445 |          |                     |             | 5'-3' |    | 42  | 425 |
|                  | 17526114 | 2,6   |          |                     |             | 5'-3' |    | 34  | 364 |
|                  | 17802144 | 2,625 | FLJ40869 | 5'-3'               | 1 1         | 5'-3' | no | 34  | 449 |
|                  | 18392885 | 2,035 |          |                     |             | 5'-3' |    | 19  | 401 |
|                  | 18417512 | 1,65  |          |                     |             | 5'-3' |    | 16  | 354 |
|                  | 18663927 | 2,765 |          |                     |             | 5'-3' |    | 35  | 387 |
|                  | 19834422 | 2,06  |          |                     |             | 5'-3' |    | 46  | 462 |
|                  | 20829325 | 1,79  | C2orf43  | 3'-5'               | 1 4         | 5'-3' | ok | 25  | 292 |
|                  | 21307706 | 2,705 |          |                     |             | 5'-3' |    | 33  | 395 |
|                  | 21888717 | 2,06  |          |                     |             | 5'-3' |    | 42  | 502 |
|                  | 27734402 | 2,265 | SUBT7L   | 5'-3'               | 1 3         | 5'-3' | no | 24  | 397 |
|                  | 33258720 | 2,275 | LTBP1    | 5'-3'               | 1 4/1       | 5'-3' | no | 28  | 459 |
|                  | 33687382 | 1,83  |          |                     |             | 5'-3' |    | 16  | 390 |
|                  | 34271952 | 1,795 |          |                     |             | 5'-3' |    | 29  | 253 |
|                  | 35043797 | 1,565 |          |                     |             | 5'-3' |    | 17  | 327 |
|                  | 35362932 | 1,895 |          |                     |             | 5'-3' |    | 26  | 515 |
|                  | 35864030 | 2,53  |          |                     |             | 5'-3' |    | 40  | 390 |
|                  | 37597747 | 2,055 |          |                     |             | 5'-3' |    | 48  | 443 |
|                  | 38650789 | 2,68  | HNRPLL   | 3'-5'               | 1 7         | 5'-3' | ok | 34  | 438 |
|                  | 38665918 | 2,605 | HNRPLL   | 3'-5'               | 1 3 E 3 1 2 | 5'-3' | ok | 34  | 453 |
|                  | 38826574 | 2,56  | SFRS7    | 3'-5'               | 1 7 E 7 1 6 | 5'-3' | ok | 29  | 412 |
|                  | 41600006 | 2,37  |          |                     |             | 5'-3' |    | 40  | 460 |
|                  | 43806235 | 2,38  | PLEKHH2  | 5'-3'               | 1 13        | 5'-3' |    | 30  | 360 |
|                  | 45462730 | 2,035 |          |                     |             | 5'-3' |    | 22  | 447 |
|                  | 45714208 | 2,465 |          |                     |             | 5'-3' |    | 27  | 411 |
|                  | 48398689 | 2,47  | FOXN2    | 5'-3'               | 1 1         | 5'-3' | no | 38  | 358 |
| 50949499         | 2,185    | NRXN1 | 3'-5'    | 1 3                 | 5'-3'       | ok    | 38 | 517 |     |
| 51002985         | 2,425    | NRXN1 | 3'-5'    | 1 4 E 3 1 3/E 3 1 3 | 5'-3'       | ok    | 28 | 429 |     |

|           |       |           |       |              |       |    |    |     |
|-----------|-------|-----------|-------|--------------|-------|----|----|-----|
| 52132423  | 1,605 |           |       |              | 5'-3' |    | 50 | 305 |
| 52462288  | 1,675 |           |       |              | 5'-3' |    | 23 | 289 |
| 53180511  | 2,31  |           |       |              | 5'-3' |    | 27 | 376 |
| 53820203  | 2,115 | ASB3      | 3'-5' | 13           | 5'-3' | ok | 20 | 411 |
| 53964347  | 1,8   | PSME4     | 3'-5' | 129          | 5'-3' | ok | 22 | 494 |
| 55346816  | 2,355 | MTIF2     | 3'-5' | 14 E 4   4/1 | 5'-3' | ok | 25 | 405 |
| 56641812  | 2,725 |           |       |              | 5'-3' |    | 38 | 409 |
| 56825729  | 2,41  |           |       |              | 5'-3' |    | 34 | 326 |
| 57062876  | 2,13  |           |       |              | 5'-3' |    | 32 | 528 |
| 57423121  | 2,015 |           |       |              | 5'-3' |    | 44 | 327 |
| 57457934  | 1,71  |           |       |              | 5'-3' |    | 25 | 542 |
| 58077650  | 2,145 |           |       |              | 5'-3' |    | 23 | 435 |
| 60311315  | 2,215 |           |       |              | 5'-3' |    | 48 | 407 |
| 61149154  | 2,225 | KIAA1841  | 5'-3' | 11 E 2   2   | 5'-3' | no | 30 | 489 |
| 61426047  | 2,605 | USP34     | 3'-5' | 19           | 5'-3' | ok | 39 | 395 |
| 63576363  | 2,245 | LOC51057  | 3'-5' | 11           | 5'-3' | ok | 28 | 465 |
| 64282238  | 2,03  |           |       |              | 5'-3' |    | 49 | 380 |
| 66136076  | 1,505 |           |       |              | 5'-3' |    | 47 | 255 |
| 66681979  | 2,69  |           |       |              | 5'-3' |    | 35 | 372 |
| 66997294  | 2,25  |           |       |              | 5'-3' |    | 24 | 394 |
| 67169288  | 2,82  |           |       |              | 5'-3' |    | 35 | 420 |
| 67785248  | 2,475 |           |       |              | 5'-3' |    | 42 | 399 |
| 68061413  | 2,68  |           |       |              | 5'-3' |    | 38 | 400 |
| 68777904  | 1,655 |           |       |              | 5'-3' |    | 47 | 533 |
| 69069188  | 2,19  |           |       |              | 5'-3' |    | 44 | 362 |
| 72873453  | 2,32  | EXOC6B    | 3'-5' | 11           | 5'-3' | ok | 30 | 348 |
| 74669401  | 1,885 | LOC130951 | 3'-5' | 14           | 5'-3' | ok | 21 | 467 |
| 79319026  | 2,34  |           |       |              | 5'-3' |    | 29 | 456 |
| 81017603  | 2,03  |           |       |              | 5'-3' |    | 51 | 418 |
| 83724978  | 2,725 |           |       |              | 5'-3' |    | 33 | 399 |
| 83737809  | 2,7   |           |       |              | 5'-3' |    | 37 | 394 |
| 86812670  | 2,645 | RMND5A    | 5'-3' | 11           | 5'-3' | no | 33 | 435 |
| 87046351  | 2,7   | RANBP2    | 5'-3' | 17           | 5'-3' | no | 36 | 384 |
| 88123921  | 2,37  | KRCC1     | 3'-5' | 11           | 5'-3' | ok | 44 | 398 |
| 91095692  | 2,48  |           |       |              | 5'-3' |    | 32 | 360 |
| 91555828  | 1,875 |           |       |              | 5'-3' |    | 16 | 419 |
| 91570597  | 2,55  |           |       |              | 5'-3' |    | 41 | 404 |
| 99654780  | 1,775 | AFF3      | 3'-5' | 17           | 5'-3' | ok | 20 | 479 |
| 100723312 | 2,215 |           |       |              | 5'-3' |    | 48 | 407 |
| 102476740 | 2,05  | SLC9A4    | 5'-3' | 12           | 5'-3' | no | 50 | 394 |

|                  |            |               |              |            |              |           |           |            |
|------------------|------------|---------------|--------------|------------|--------------|-----------|-----------|------------|
| 103437796        | 2,1        |               |              |            | 5'-3'        |           | 38        | 534        |
| 104971744        | 2,39       |               |              |            | 5'-3'        |           | 32        | 342        |
| 107094824        | 2,015      |               |              |            | 5'-3'        |           | 31        | 541        |
| 107230464        | 1,735      |               |              |            | 5'-3'        |           | 26        | 271        |
| 107307596        | 2,07       |               |              |            | 5'-3'        |           | 35        | 570        |
| 107833929        | 2,63       |               |              |            | 5'-3'        |           | 36        | 370        |
| <b>109931042</b> | <b>2,7</b> | <b>RANBP2</b> | <b>5'-3'</b> | <b>17</b>  | <b>5'-3'</b> | <b>no</b> | <b>36</b> | <b>384</b> |
| 110668361        | 2,01       |               |              |            | 5'-3'        |           | 29        | 522        |
| 113579030        | 1,86       |               |              |            | 5'-3'        |           | 18        | 442        |
| 115255681        | 2,2        | DPP10         | 5'-3'        | 11         | 5'-3'        | no        | 44        | 454        |
| 116665800        | 2,7        |               |              |            | 5'-3'        |           | 38        | 404        |
| 117815318        | 2,385      |               |              |            | 5'-3'        |           | 29        | 371        |
| 119051707        | 2,685      |               |              |            | 5'-3'        |           | 32        | 417        |
| 123846373        | 2,6        |               |              |            | 5'-3'        |           | 38        | 384        |
| 127068068        | 2,305      |               |              |            | 5'-3'        |           | 34        | 305        |
| 132384025        | 1,765      |               |              |            | 5'-3'        |           | 48        | 317        |
| 132801750        | 1,855      |               |              |            | 5'-3'        |           | 18        | 443        |
| 133374214        | 2,6        | NAP5          | 3'-5'        | 18         | 5'-3'        | ok        | 40        | 404        |
| 133704331        | 2,105      | NAP5          | 3'-5'        | 14         | 5'-3'        | ok        | 21        | 423        |
| 134146479        | 1,17       |               |              |            | 5'-3'        |           | 19        | 590        |
| 134637786        | 2,625      |               |              |            | 5'-3'        |           | 31        | 419        |
| 136229156        | 2,42       | UBXD2         | 5'-3'        | 14 E 4   5 | 5'-3'        | no        | 41        | 378        |
| 137180845        | 2,27       |               |              |            | 5'-3'        |           | 46        | 398        |
| 139660996        | 2,135      |               |              |            | 5'-3'        |           | 21        | 401        |
| 139985876        | 2,535      |               |              |            | 5'-3'        |           | 41        | 417        |
| 140235483        | 2,36       |               |              |            | 5'-3'        |           | 45        | 412        |
| 147452261        | 2,145      |               |              |            | 5'-3'        |           | 21        | 403        |
| 148029380        | 2,255      |               |              |            | 5'-3'        |           | 38        | 315        |
| 151187791        | 2,025      |               |              |            | 5'-3'        |           | 38        | 269        |
| 154611845        | 2,04       | GALNT13       | 5'-3'        | 13         | 5'-3'        | no        | 21        | 436        |
| 154985465        | 2          | GALNT13       | 5'-3'        | 110        | 5'-3'        | no        | 26        | 494        |
| 155284239        | 2,155      | KCNJ3         | 5'-3'        | 12         | 5'-3'        | no        | 48        | 395        |
| 158891707        | 2,05       | LOC130940     | 3'-5'        | 17         | 5'-3'        | ok        | 27        | 324        |
| 163442616        | 2,555      |               |              |            | 5'-3'        |           | 38        | 443        |
| 163912360        | 1,895      |               |              |            | 5'-3'        |           | 24        | 323        |
| 164125563        | 2,095      |               |              |            | 5'-3'        |           | 29        | 505        |
| 164785730        | 2,595      |               |              |            | 5'-3'        |           | 32        | 383        |
| 164799663        | 1,84       |               |              |            | 5'-3'        |           | 16        | 392        |
| 165752289        | 2,585      | SCN3A         | 3'-5'        | 11         | 5'-3'        | ok        | 31        | 427        |
| 165946061        | 2,315      | SCN2A         | 3'-5'        | 125        | 5'-3'        | ok        | 44        | 431        |

|                  |              |              |              |                |              |           |           |            |
|------------------|--------------|--------------|--------------|----------------|--------------|-----------|-----------|------------|
| 166013817        | 1,82         |              |              |                | 5'-3'        |           | 18        | 450        |
| 166545502        | 2,07         |              |              |                | 5'-3'        |           | 20        | 398        |
| 166598363        | 2,585        | SCN1A        | 3'-5'        | I 16           | 5'-3'        | ok        | 33        | 371        |
| 168260130        | 1,415        |              |              |                | 5'-3'        |           | 21        | 561        |
| 169205000        | 2,23         | LASS6        | 5'-3'        | I 4            | 5'-3'        | no        | 23        | 418        |
| 169616326        | 1,69         |              |              |                | 5'-3'        |           | 17        | 466        |
| 171530877        | 2,3          | GORASP2      | 5'-3'        | E 10           | 5'-3'        | no        | 28        | 454        |
| 173570343        | 2,365        | RAPGEF4      | 5'-3'        | I 16           | 5'-3'        | no        | 38        | 481        |
| 176230415        | 2,12         |              |              |                | 5'-3'        |           | 21        | 398        |
| 176760251        | 1,975        |              |              |                | 5'-3'        |           | 39        | 269        |
| 180234592        | 2,065        | ZNF533       | 3'-5'        | I 3            | 5'-3'        | ok        | 24        | 357        |
| 181010885        | 1,89         |              |              |                | 5'-3'        |           | 41        | 546        |
| 181040990        | 2,11         |              |              |                | 5'-3'        |           | 30        | 306        |
| 182493107        | 2,7          | SSFA2        | 5'-3'        | I 14 E 15 I 15 | 5'-3'        | no        | 35        | 444        |
| 182877786        | 1,945        | PDE1A        | 3'-5'        | I 2            | 5'-3'        | ok        | 17        | 403        |
| 184899918        | 2,535        |              |              |                | 5'-3'        |           | 40        | 391        |
| 185031528        | 2,55         |              |              |                | 5'-3'        |           | 38        | 444        |
| 187187842        | 2,65         | ITGAV        | 5'-3'        | I 2            | 5'-3'        | no        | 39        | 414        |
| 188387377        | 2,37         |              |              |                | 5'-3'        |           | 44        | 420        |
| 188463100        | 2,13         |              |              |                | 5'-3'        |           | 25        | 360        |
| 188547788        | 2,245        |              |              |                | 5'-3'        |           | 27        | 455        |
| 190447142        | 2,59         | PMS1         | 5'-3'        | I 12           | 5'-3'        | no        | 31        | 426        |
| 191508785        | 2,39         | GLS          | 5'-3'        | I 14           | 5'-3'        | no        | 38        | 342        |
| <b>191722160</b> | <b>2,22</b>  | <b>STAT4</b> | <b>3'-5'</b> | <b>I 1</b>     | <b>5'-3'</b> | <b>ok</b> | <b>42</b> | <b>470</b> |
| 193136628        | 2,8          |              |              |                | 5'-3'        |           | 34        | 414        |
| 196110956        | 2,08         |              |              |                | 5'-3'        |           | 32        | 280        |
| 196227699        | 1,925        |              |              |                | 5'-3'        |           | 43        | 299        |
| 196402644        | 2,705        | DNAH7        | 3'-5'        | I 48           | 5'-3'        | ok        | 35        | 375        |
| 197749304        | 2,015        | ANKRD44      | 3'-5'        | I 2            | 5'-3'        | ok        | 38        | 551        |
| 197749829        | 2,15         | ANKRD44      | 3'-5'        | I 2            | 5'-3'        | ok        | 49        | 414        |
| 199811251        | 2,29         |              |              |                | 5'-3'        |           | 25        | 426        |
| 200174161        | 2,66         |              |              |                | 5'-3'        |           | 32        | 396        |
| 203566417        | 2,21         |              |              |                | 5'-3'        |           | 28        | 472        |
| 204437987        | 1,36         |              |              |                | 5'-3'        |           | 24        | 602        |
| 204929158        | 2,67         |              |              |                | 5'-3'        |           | 37        | 388        |
| <b>207260487</b> | <b>2,415</b> | <b>DYTN</b>  | <b>3'-5'</b> | <b>I 9</b>     | <b>5'-3'</b> | <b>ok</b> | <b>28</b> | <b>431</b> |
| 208243187        | 1,86         |              |              |                | 5'-3'        |           | 50        | 462        |
| 208333967        | 2,08         |              |              |                | 5'-3'        |           | 46        | 458        |
| 208688195        | 1,97         |              |              |                | 5'-3'        |           | 45        | 328        |
| 209483474        | 2,22         |              |              |                | 5'-3'        |           | 45        | 440        |

|           |       |          |       |      |       |    |    |     |
|-----------|-------|----------|-------|------|-------|----|----|-----|
| 210025776 | 1,635 | MAP2     | 5'-3' | I 1  | 5'-3' | no | 16 | 467 |
| 210647222 | 2,27  | FLJ23861 | 3'-5' | I 6  | 5'-3' | ok | 38 | 500 |
| 211681490 | 2,44  |          |       |      | 5'-3' |    | 27 | 416 |
| 213412402 | 2,105 |          |       |      | 5'-3' |    | 48 | 433 |
| 214064425 | 2,735 | SPAG16   | 5'-3' | I 10 | 5'-3' | no | 35 | 381 |
| 214943371 | 2,71  | SPAG16   | 5'-3' | I 15 | 5'-3' | no | 33 | 396 |
| 216634487 | 2,365 | PECR     | 3'-5' | I 3  | 5'-3' | ok | 35 | 307 |
| 221245654 | 2,145 |          |       |      | 5'-3' |    | 41 | 495 |
| 221516127 | 1,955 |          |       |      | 5'-3' |    | 41 | 533 |
| 222752038 | 1,975 |          |       |      | 5'-3' |    | 48 | 359 |
| 225958930 | 2,165 |          |       |      | 5'-3' |    | 49 | 411 |
| 227024309 | 2,115 |          |       |      | 5'-3' |    | 31 | 297 |
| 227609447 | 2,77  | COL4A4   | 3'-5' | I 37 | 5'-3' | ok | 33 | 410 |
| 228829328 | 1,79  |          |       |      | 5'-3' |    | 47 | 506 |
| 231624181 | 2,655 |          |       |      | 5'-3' |    | 37 | 433 |
| 234740901 | 2,545 |          |       |      | 5'-3' |    | 39 | 383 |
| 238614951 | 2,35  | UBE2F    | 5'-3' | E 10 | 5'-3' | no | 26 | 394 |
| 1058861   | 2,16  | SNTG2    | 5'-3' | I 1  | 3'-5' | ok | 22 | 396 |
| 2307288   | 2,15  | MYT1L    | 3'-5' | I 1  | 3'-5' | no | 27 | 474 |
| 2408404   | 1,53  |          |       |      | 3'-5' |    | 20 | 290 |
| 6950181   | 2,355 | RSAD2    | 5'-3' | I 4  | 3'-5' | ok | 33 | 325 |
| 7175488   | 2,03  |          |       |      | 3'-5' |    | 51 | 418 |
| 7513232   | 2,61  |          |       |      | 3'-5' |    | 30 | 406 |
| 8111116   | 2,66  |          |       |      | 3'-5' |    | 34 | 442 |
| 8257724   | 2,385 |          |       |      | 3'-5' |    | 44 | 401 |
| 14127693  | 1,545 |          |       |      | 3'-5' |    | 19 | 303 |
| 14234565  | 2,65  |          |       |      | 3'-5' |    | 35 | 454 |
| 18892610  | 2,015 |          |       |      | 3'-5' |    | 45 | 481 |
| 22276745  | 2,13  |          |       |      | 3'-5' |    | 21 | 400 |
| 23169270  | 2,495 |          |       |      | 3'-5' |    | 38 | 455 |
| 26205952  | 2,135 | RAB10    | 5'-3' | I 5  | 3'-5' | ok | 47 | 381 |
| 28091503  | 2,155 | BRE      | 5'-3' | I 4  | 3'-5' | ok | 23 | 433 |
| 30706649  | 1,92  | LYCAT    | 5'-3' | I 5  | 3'-5' | ok | 23 | 480 |
| 32528039  | 2,12  | BIRC6    | 5'-3' | I 22 | 3'-5' | ok | 21 | 398 |
| 32555020  | 2,425 | BIRC6    | 5'-3' | I 34 | 3'-5' | ok | 44 | 409 |
| 34934670  | 2,395 |          |       |      | 3'-5' |    | 43 | 393 |
| 36516264  | 2,335 | CRIM1    | 5'-3' | I 2  | 3'-5' | ok | 42 | 447 |
| 36540819  | 2,46  | CRIM1    | 5'-3' | I 4  | 3'-5' | ok | 33 | 346 |
| 38103908  | 2,55  | FAM82A   | 5'-3' | I 10 | 3'-5' | ok | 36 | 464 |
| 38936304  | 2,465 | DHX57    | 3'-5' | I 7  | 3'-5' | no | 32 | 461 |

|                 |              |              |              |             |              |    |           |            |
|-----------------|--------------|--------------|--------------|-------------|--------------|----|-----------|------------|
| 39318666        | 2,52         |              |              |             | 3'-5'        |    | 42        | 410        |
| 41000999        | 2,485        |              |              |             | 3'-5'        |    | 38        | 361        |
| 43837288        | 1,975        | PLEKHH2      | 5'-3'        | I 25 E 26   | 3'-5'        | ok | 22        | 459        |
| 44485990        | 2,14         | C2orf34      | 5'-3'        | I 3         | 3'-5'        | ok | 48        | 392        |
| <b>46190211</b> | <b>2,195</b> | <b>PRKCE</b> | <b>5'-3'</b> | <b>I 11</b> | <b>3'-5'</b> | ok | <b>31</b> | <b>313</b> |
| 51194572        | 2,58         |              |              |             | 3'-5'        |    | 34        | 360        |
| 52394341        | 2,08         |              |              |             | 3'-5'        |    | 23        | 448        |
| 52453194        | 2,18         |              |              |             | 3'-5'        |    | 39        | 310        |
| 52486718        | 2,14         |              |              |             | 3'-5'        |    | 48        | 392        |
| 52532268        | 2,06         |              |              |             | 3'-5'        |    | 19        | 406        |
| 53675323        | 1,905        |              |              |             | 3'-5'        |    | 23        | 335        |
| 54447017        | 2,705        |              |              |             | 3'-5'        |    | 36        | 433        |
| 56395437        | 1,83         | CCDC85A      | 5'-3'        | I 2         | 3'-5'        | ok | 48        | 330        |
| 57841128        | 2,145        |              |              |             | 3'-5'        |    | 41        | 323        |
| 58004469        | 2,605        |              |              |             | 3'-5'        |    | 31        | 423        |
| 59120420        | 1,585        |              |              |             | 3'-5'        |    | 17        | 331        |
| 66616541        | 1,915        | MEIS1        | 5'-3'        | I 8         | 3'-5'        | ok | 16        | 407        |
| 66632783        | 2,37         | MEIS1        | 5'-3'        | I 9         | 3'-5'        | ok | 40        | 358        |
| 66680586        | 2,715        |              |              |             | 3'-5'        |    | 33        | 397        |
| 67631312        | 1,79         |              |              |             | 3'-5'        |    | 17        | 446        |
| 67706239        | 1,79         |              |              |             | 3'-5'        |    | 50        | 476        |
| 67742895        | 2,21         |              |              |             | 3'-5'        |    | 48        | 406        |
| 68209857        | 2,48         |              |              |             | 3'-5'        |    | 38        | 360        |
| 68686325        | 2,225        |              |              |             | 3'-5'        |    | 24        | 429        |
| 76715992        | 1,495        |              |              |             | 3'-5'        |    | 45        | 585        |
| 76933754        | 2,16         |              |              |             | 3'-5'        |    | 27        | 472        |
| <b>76984839</b> | <b>2,04</b>  |              |              |             | <b>3'-5'</b> |    | <b>26</b> | <b>332</b> |
| 78168606        | 2,07         |              |              |             | 3'-5'        |    | 44        | 480        |
| 78714908        | 2,82         |              |              |             | 3'-5'        |    | 35        | 398        |
| 79596949        | 2,245        | CTNNA2       | 5'-3'        | I 1         | 3'-5'        | ok | 44        | 445        |
| 79922460        | 2,56         | CTNNA2       | 5'-3'        | I 3         | 3'-5'        | ok | 37        | 366        |
| 80302494        | 1,64         | CTNNA2       | 5'-3'        | I 7         | 3'-5'        | ok | 51        | 322        |
| 80865500        | 2,005        |              |              |             | 3'-5'        |    | 19        | 423        |
| 82141079        | 1,635        |              |              |             | 3'-5'        |    | 51        | 321        |
| 82970266        | 2,15         |              |              |             | 3'-5'        |    | 46        | 444        |
| 84726172        | 1,87         |              |              |             | 3'-5'        |    | 54        | 398        |
| 86675325        | 1,52         |              |              |             | 3'-5'        |    | 27        | 600        |
| 87144709        | 2,635        |              |              |             | 3'-5'        |    | 33        | 437        |
| 87451721        | 2,48         |              |              |             | 3'-5'        |    | 32        | 360        |
| 87884213        | 2,7          | RANBP2       | 5'-3'        | I 7         | 3'-5'        | ok | 36        | 384        |

|                  |             |               |              |  |              |              |    |           |            |
|------------------|-------------|---------------|--------------|--|--------------|--------------|----|-----------|------------|
| 88787522         | 1,705       | RPIA          | 5'-3'        |  | 1 3          | 3'-5'        | ok | 54        | 453        |
| 89939284         | 2,48        |               |              |  |              | 3'-5'        |    | 32        | 360        |
| 91055159         | 2,04        |               |              |  |              | 3'-5'        |    | 49        | 382        |
| 91385049         | 2,55        |               |              |  |              | 3'-5'        |    | 41        | 404        |
| 91547457         | 2,48        |               |              |  |              | 3'-5'        |    | 32        | 360        |
| 98335572         | 1,74        | CNGA3         | 5'-3'        |  | 1 1          | 3'-5'        | ok | 50        | 332        |
| 98709096         | 2,475       | MGAT4A        | 3'-5'        |  | 1 2 E 2 1 1  | 3'-5'        | no | 39        | 369        |
| 98749121         | 1,635       |               |              |  |              | 3'-5'        |    | 30        | 607        |
| <b>99704768</b>  | <b>2,04</b> | <b>AFF3</b>   | <b>3'-5'</b> |  | <b>1 10</b>  | <b>3'-5'</b> | no | <b>38</b> | <b>272</b> |
| 101789763        | 2           | MAP4K4        | 5'-3'        |  | 1 3          | 3'-5'        | ok | 34        | 574        |
| 106427176        | 2,625       |               |              |  |              | 3'-5'        |    | 36        | 369        |
| 108633863        | 1,99        | LIMS1         | 5'-3'        |  | 1 1          | 3'-5'        | ok | 29        | 526        |
| 110009502        | 2,01        |               |              |  |              | 3'-5'        |    | 29        | 522        |
| <b>110746876</b> | <b>2,7</b>  | <b>RANBP2</b> | <b>5'-3'</b> |  | <b>1 7</b>   | <b>3'-5'</b> | ok | <b>36</b> | <b>384</b> |
| <b>111028347</b> | <b>2,7</b>  | <b>RANBP2</b> | <b>5'-3'</b> |  | <b>1 7</b>   | <b>3'-5'</b> | ok | <b>36</b> | <b>384</b> |
| 111385607        | 2,71        | ACOXL         | 5'-3'        |  | 1 5          | 3'-5'        | ok | 36        | 432        |
| <b>112883327</b> | <b>2,71</b> |               |              |  |              | <b>3'-5'</b> |    | <b>36</b> | <b>384</b> |
| 113334940        | 2,39        |               |              |  |              | 3'-5'        |    | 44        | 416        |
| 113372209        | 2,045       |               |              |  |              | 3'-5'        |    | 24        | 353        |
| 114676184        | 2,42        |               |              |  |              | 3'-5'        |    | 37        | 480        |
| 115243229        | 2,16        | DPP10         | 5'-3'        |  | 1 1          | 3'-5'        | ok | 47        | 386        |
| 117160563        | 1,755       |               |              |  |              | 3'-5'        |    | 16        | 443        |
| 117334572        | 2,32        |               |              |  |              | 3'-5'        |    | 43        | 440        |
| 118627376        | 1,65        |               |              |  |              | 3'-5'        |    | 49        | 514        |
| 120510204        | 2,16        | EPB41L5       | 5'-3'        |  | 1 2          | 3'-5'        | ok | 38        | 522        |
| 122032234        | 1,7         | CLASP1        | 3'-5'        |  | 1 2          | 3'-5'        | no | 53        | 464        |
| 125624528        | 2,785       |               |              |  |              | 3'-5'        |    | 34        | 401        |
| 126281248        | 1,49        |               |              |  |              | 3'-5'        |    | 48        | 556        |
| 129504686        | 2,21        |               |              |  |              | 3'-5'        |    | 24        | 386        |
| 129795956        | 2,405       |               |              |  |              | 3'-5'        |    | 42        | 385        |
| 131661195        | 2,185       |               |              |  |              | 3'-5'        |    | 41        | 487        |
| 135745422        | 2,4         | ZRANB3        | 3'-5'        |  | 1 10 E 9 1 9 | 3'-5'        | no | 43        | 424        |
| 135761852        | 1,61        | ZRANB3        | 3'-5'        |  | 1 8          | 3'-5'        | no | 18        | 326        |
| 138672050        | 2,745       |               |              |  |              | 3'-5'        |    | 36        | 425        |
| 140587680        | 2,445       |               |              |  |              | 3'-5'        |    | 43        | 403        |
| 140754342        | 2,535       | LRP1B         | 3'-5'        |  | 1 84         | 3'-5'        | no | 29        | 417        |
| 141565710        | 2,33        | LRP1B         | 3'-5'        |  | 1 7          | 3'-5'        | no | 39        | 478        |
| 142797961        | 2,24        |               |              |  |              | 3'-5'        |    | 24        | 392        |
| 144222102        | 2,74        | ARHGAP15      | 5'-3'        |  | 1 13         | 3'-5'        | ok | 37        | 416        |
| <b>144761816</b> | <b>0,99</b> | <b>GTDC1</b>  | <b>3'-5'</b> |  | <b>1 1</b>   | <b>3'-5'</b> | no | <b>16</b> | <b>596</b> |

|           |       |          |       |                    |       |    |    |     |
|-----------|-------|----------|-------|--------------------|-------|----|----|-----|
| 145557193 | 1,635 |          |       |                    | 3'-5' |    | 54 | 351 |
| 145984636 | 2,37  |          |       |                    | 3'-5' |    | 45 | 408 |
| 146510044 | 1,88  |          |       |                    | 3'-5' |    | 53 | 390 |
| 147952660 | 2,54  |          |       |                    | 3'-5' |    | 30 | 392 |
| 148714301 | 2,21  |          |       |                    | 3'-5' |    | 45 | 442 |
| 149391013 | 1,6   | KIF5C    | 5'-3' | I 1                | 3'-5' | ok | 44 | 574 |
| 151588496 | 2,38  |          |       |                    | 3'-5' |    | 29 | 370 |
| 155213219 | 2,33  |          |       |                    | 3'-5' |    | 28 | 370 |
| 156104525 | 2,17  |          |       |                    | 3'-5' |    | 25 | 368 |
| 156217188 | 1,735 |          |       |                    | 3'-5' |    | 16 | 447 |
| 156551961 | 2,585 |          |       |                    | 3'-5' |    | 39 | 427 |
| 157600891 | 1,775 |          |       |                    | 3'-5' |    | 17 | 449 |
| 157943862 | 2,155 |          |       |                    | 3'-5' |    | 23 | 433 |
| 160520116 | 2,17  | PLA2R1   | 3'-5' | I 23 E 22 I 22     | 3'-5' | no | 21 | 408 |
| 160685618 | 2,65  | ITGB6    | 3'-5' | I 12               | 3'-5' | no | 31 | 404 |
| 165061865 | 2,375 | GRB14    | 3'-5' | 2 E 12 I 11 E 11 I | 3'-5' | no | 44 | 419 |
| 165614199 | 2,685 |          |       |                    | 3'-5' |    | 32 | 401 |
| 166036507 | 2,37  |          |       |                    | 3'-5' |    | 43 | 430 |
| 167797571 | 1,9   | XIRP2    | 3'-5' | I 3                | 3'-5' | no | 17 | 394 |
| 170729769 | 2,455 |          |       |                    | 3'-5' |    | 35 | 493 |
| 172291315 | 2,41  | DYNC1I2  | 5'-3' | I 10 E 10 I 11     | 3'-5' | ok | 42 | 432 |
| 172703662 | 2,185 |          |       |                    | 3'-5' |    | 46 | 437 |
| 173341513 | 2,335 | RAPGEF4  | 5'-3' | I 1                | 3'-5' | ok | 25 | 417 |
| 176876808 | 2,715 | MTX2     | 5'-3' | I 4                | 3'-5' | ok | 38 | 407 |
| 177186397 | 2,19  |          |       |                    | 3'-5' |    | 42 | 476 |
| 177577453 | 2,815 |          |       |                    | 3'-5' |    | 36 | 411 |
| 180286915 | 2,23  | ZNF533   | 3'-5' | I 3                | 3'-5' | no | 45 | 380 |
| 181723081 | 2,03  |          |       |                    | 3'-5' |    | 20 | 390 |
| 181869168 | 2,67  |          |       |                    | 3'-5' |    | 32 | 420 |
| 182652500 | 2,665 | PPP1R1C  | 5'-3' | I 4                | 3'-5' | ok | 38 | 421 |
| 184385795 | 1,65  |          |       |                    | 3'-5' |    | 17 | 344 |
| 184699353 | 2,135 |          |       |                    | 3'-5' |    | 24 | 447 |
| 184735510 | 2,015 |          |       |                    | 3'-5' |    | 51 | 397 |
| 185100004 | 2,465 |          |       |                    | 3'-5' |    | 42 | 421 |
| 185752201 | 1,92  |          |       |                    | 3'-5' |    | 19 | 440 |
| 187072461 | 1,64  | ZC3H15   | 5'-3' | I 2                | 3'-5' | ok | 44 | 252 |
| 187356648 | 1,62  |          |       |                    | 3'-5' |    | 54 | 348 |
| 188969302 | 2,655 | GULP1    | 5'-3' | I 2                | 3'-5' | ok | 34 | 375 |
| 189987527 | 2,625 |          |       |                    | 3'-5' |    | 30 | 409 |
| 190770152 | 1,16  | MGC13057 | 5'-3' | I 1                | 3'-5' | ok | 54 | 562 |



|                  |              |                 |              |             |              |            |              |               |
|------------------|--------------|-----------------|--------------|-------------|--------------|------------|--------------|---------------|
| 191040348        | 2,1          | FLJ20160        | 5'-3'        | I 1         | 3'-5'        | ok         | 23           | 374           |
| 191152758        | 1,52         |                 |              |             | 3'-5'        |            | 54           | 328           |
| 192778120        | 2,09         |                 |              |             | 3'-5'        |            | 24           | 456           |
| 193311549        | 2,315        |                 |              |             | 3'-5'        |            | 43           | 377           |
| 193936987        | 1,99         |                 |              |             | 3'-5'        |            | 18           | 416           |
| 194527119        | 1,94         |                 |              |             | 3'-5'        |            | 17           | 416           |
| 195022625        | 1,79         |                 |              |             | 3'-5'        |            | 41           | 252           |
| 195881946        | 2,16         |                 |              |             | 3'-5'        |            | 21           | 406           |
| 196252606        | 1,555        | SLC39A10        | 5'-3'        | I 1 E 2     | 3'-5'        | ok         | 18           | 315           |
| 196618088        | 2,195        | DNAH7           | 3'-5'        | I 5         | 3'-5'        | no         | 22           | 403           |
| 200999468        | 1,895        | LOC26010        | 5'-3'        | I 6         | 3'-5'        | ok         | 18           | 383           |
| 204758479        | 2,365        |                 |              |             | 3'-5'        |            | 32           | 481           |
| 205900683        | 1,95         | PARD3B          | 5'-3'        | I 18        | 3'-5'        | ok         | 51           | 384           |
| 209586550        | 2,04         |                 |              |             | 3'-5'        |            | 50           | 392           |
| 210946812        | 2,07         |                 |              |             | 3'-5'        |            | 43           | 328           |
| <b>214673622</b> | <b>2,6</b>   | <b>SPAG16</b>   | <b>5'-3'</b> | <b>I 13</b> | <b>3'-5'</b> | ok         | <b>37</b>    | <b>374</b>    |
| 215533510        | 2,055        | ABCA12          | 3'-5'        | I 31        | 3'-5'        | no         | 24           | 355           |
| 220585235        | 2,305        |                 |              |             | 3'-5'        |            | 39           | 335           |
| 223135274        | 1,765        |                 |              |             | 3'-5'        |            | 51           | 347           |
| 223165925        | 2,495        | FARSB           | 3'-5'        | I 16        | 3'-5'        | no         | 40           | 383           |
| 224061178        | 1,195        |                 |              |             | 3'-5'        |            | 51           | 585           |
| <b>224595517</b> | <b>2,335</b> | <b>SERPINE2</b> | <b>3'-5'</b> | <b>I 1</b>  | <b>3'-5'</b> | no         | <b>26</b>    | <b>391</b>    |
| 224626969        | 1,96         |                 |              |             | 3'-5'        |            | 53           | 412           |
| 226588104        | 2,715        |                 |              |             | 3'-5'        |            | 37           | 421           |
| 227060218        | 2,02         |                 |              |             | 3'-5'        |            | 44           | 328           |
| 229900722        | 2,715        |                 |              |             | 3'-5'        |            | 32           | 411           |
| 230826346        | 2,235        | SP140           | 5'-3'        | E 11 I 11   | 3'-5'        | ok         | 33           | 517           |
| 231328189        | 1,14         | CAB39           | 5'-3'        | I 1         | 3'-5'        | ok         | 50           | 212           |
| 231531046        | 1,925        |                 |              |             | 3'-5'        |            | 20           | 449           |
| 232600964        | 2,065        | DIS3L2          | 5'-3'        | I 4         | 3'-5'        | ok         | 41           | 307           |
| 233257532        | 2,71         |                 |              |             | 3'-5'        |            | 35           | 442           |
| 238629207        | 2,565        |                 |              |             | 3'-5'        |            | 41           | 407           |
| 239355143        | 2,4          |                 | 74           |             | 3'-5'        | ok         | 42           | 434           |
|                  |              |                 | 53           |             |              | <b>127</b> | <b>34,47</b> | <b>410,72</b> |
|                  |              |                 | <b>127</b>   |             |              | <b>46</b>  | <b>33,84</b> | <b>409,87</b> |
|                  |              |                 |              |             |              | <b>81</b>  | <b>34,82</b> | <b>411,21</b> |

Ø

|                  |             |           |         |       |              |       |           |            |     |
|------------------|-------------|-----------|---------|-------|--------------|-------|-----------|------------|-----|
| 3<br>319 results | 424939      | 2,355     | CLH1    | 5'-3' | E 28 I       | 5'-3' | no        | 43         | 385 |
|                  | 1480916     | 1,95      |         |       |              | 5'-3' |           | 21         | 454 |
|                  | 2572960     | 2,675     | CNTN4   | 5'-3' | I 2          | 5'-3' | no        | 37         | 389 |
|                  | 3785297     | 1,365     |         |       |              | 5'-3' |           | 17         | 287 |
|                  | 5933560     | 1,835     |         |       |              | 5'-3' |           | 16         | 391 |
|                  | 6123765     | 2,345     |         |       |              | 5'-3' |           | 43         | 383 |
|                  | 7377138     | 2,725     | GRM7    | 5'-3' | I 4          | 5'-3' | no        | 32         | 409 |
|                  | 9540437     | 2,695     | LHFPL4  | 3'-5' | I 2          | 5'-3' | ok        | 32         | 403 |
|                  | 11030346    | 2,025     | SLC6A1  | 5'-3' | I 1          | 5'-3' | no        | 32         | 549 |
|                  | 11753633    | 1,865     |         |       |              | 5'-3' |           | 20         | 461 |
|                  | 14126115    | 1,79      |         |       |              | 5'-3' |           | 21         | 332 |
|                  | 15071259    | 2,405     | MRPS25  | 3'-5' | I 2          | 5'-3' | ok        | 31         | 355 |
|                  | 15627004    | 2,28      | BTD     | 5'-3' | I 1          | 5'-3' | no        | 27         | 370 |
|                  | 16935153    | 2,67      | PLCL2   | 5'-3' | I 1          | 5'-3' | no        | 31         | 410 |
|                  | 20691173    | 1,405     |         |       |              | 5'-3' |           | 46         | 225 |
|                  | 21256635    | 2,28      |         |       |              | 5'-3' |           | 25         | 390 |
|                  | 21982928    | 2,125     |         |       |              | 5'-3' |           | 43         | 479 |
|                  | 24576149    | 2,265     |         |       |              | 5'-3' |           | 25         | 387 |
|                  | 25039688    | 2,545     |         |       |              | 5'-3' |           | 40         | 393 |
|                  | 26309729    | 2,615     |         |       |              | 5'-3' |           | 40         | 411 |
|                  | 26996978    | 1,98      |         |       |              | 5'-3' |           | 23         | 350 |
|                  | 28437213    | 1,96      | ZCWPW2  | 5'-3' | I 2          | 5'-3' | no        | 46         | 336 |
|                  | 29602004    | 1,78      | RBMS3   | 5'-3' | I 3          | 5'-3' | no        | 17         | 370 |
|                  | 31538471    | 2,665     |         |       |              | 5'-3' |           | 39         | 411 |
|                  | 34035619    | 2,085     |         |       |              | 5'-3' |           | 50         | 401 |
|                  | 34532173    | 2,585     |         |       |              | 5'-3' |           | 35         | 467 |
|                  | 37039677    | 1,94      | MLH1    | 5'-3' | I 11         | 5'-3' | no        | 22         | 466 |
|                  | 37110514    | 2,21      | LRRFIP2 | 3'-5' | I 16         | 5'-3' | ok        | 25         | 442 |
|                  | 41138641    | 1,94      |         |       |              | 5'-3' |           | 20         | 372 |
|                  | 42912518    | 1,515     |         |       |              | 5'-3' |           | 43         | 217 |
|                  | 44212160    | 2,065     |         |       |              | 5'-3' |           | 51         | 411 |
| 45039427         | 2,14        |           |         |       | 5'-3'        |       | 46        | 372        |     |
| 46086079         | 2,725       |           |         |       | 5'-3'        |       | 32        | 409        |     |
| <b>46256742</b>  | <b>2,38</b> |           |         |       | <b>5'-3'</b> |       | <b>43</b> | <b>428</b> |     |
| 47312834         | 1,935       | KLHL18    | 5'-3'   | I 1   | 5'-3'        | no    | 44        | 507        |     |
| 47667898         | 2,705       | SMARCC1   | 3'-5'   | I 21  | 5'-3'        | ok    | 38        | 405        |     |
| 49192086         | 1,925       | LOC646498 | 3'-5'   | I 2   | 5'-3'        | ok    | 26        | 309        |     |
| 53026806         | 1,765       | SFMBT1    | 3'-5'   | I 2   | 5'-3'        | ok    | 30        | 581        |     |

|                 |              |                |              |              |              |    |           |            |
|-----------------|--------------|----------------|--------------|--------------|--------------|----|-----------|------------|
| 53474919        | 1,955        |                |              |              | 5'-3'        |    | 23        | 345        |
| 54670550        | 1,965        | CACNA2D3       | 5'-3'        | 11           | 5'-3'        | no | 49        | 451        |
| 58824161        | 2,145        | FLJ42117       | 3'-5'        | 12 E 12   11 | 5'-3'        | ok | 44        | 465        |
| 58944404        | 1,98         | FLJ42117       | 3'-5'        | 4            | 5'-3'        | ok | 41        | 528        |
| 59838737        | 2,385        | FHIT           | 3'-5'        | 8            | 5'-3'        | ok | 34        | 497        |
| 61321510        | 2,525        |                |              |              | 5'-3'        |    | 36        | 349        |
| 64432029        | 2,2          |                |              |              | 5'-3'        |    | 23        | 424        |
| <b>64569513</b> | <b>2,245</b> | <b>ADAMTS9</b> |              | <b>  22</b>  | <b>5'-3'</b> |    | <b>45</b> | <b>383</b> |
| <b>64569513</b> | <b>2,245</b> | <b>ADAMTS9</b> | <b>3'-5'</b> | <b>  22</b>  | <b>5'-3'</b> | ok | <b>45</b> | <b>383</b> |
| 64580430        | 2,41         | ADAMTS9        | 3'-5'        | 19           | 5'-3'        | ok | 36        | 326        |
| 64581158        | 2,18         | ADAMTS9        | 3'-5'        | 19           | 5'-3'        | ok | 22        | 418        |
| 67327514        | 2,455        |                |              |              | 5'-3'        |    | 29        | 385        |
| 67348460        | 2,19         |                |              |              | 5'-3'        |    | 45        | 372        |
| 68254599        | 2,295        | FAM19A1        | 5'-3'        | 2            | 5'-3'        | no | 35        | 293        |
| 68938327        | 1,705        | FAM19A4        | 3'-5'        | 3            | 5'-3'        | ok | 30        | 593        |
| 69520609        | 2,21         |                |              |              | 5'-3'        |    | 47        | 422        |
| 71267878        | 2,085        | FOXP1          | 3'-5'        | 6            | 5'-3'        | ok | 34        | 557        |
| 73457664        | 2,485        |                |              |              | 5'-3'        |    | 38        | 457        |
| 75783139        | 2,22         |                |              |              | 5'-3'        |    | 47        | 420        |
| 76390341        | 2,85         |                |              |              | 5'-3'        |    | 35        | 414        |
| 76556019        | 2,13         |                |              |              | 5'-3'        |    | 26        | 468        |
| 78565964        | 2,325        |                |              |              | 5'-3'        |    | 28        | 369        |
| 78679833        | 2,18         |                |              |              | 5'-3'        |    | 28        | 478        |
| 79146673        | 1,99         | ROBO1          | 3'-5'        | 2            | 5'-3'        | ok | 44        | 322        |
| 81170864        | 2,7          |                |              |              | 5'-3'        |    | 32        | 404        |
| 81445109        | 2,01         |                |              |              | 5'-3'        |    | 50        | 432        |
| 82160393        | 1,93         |                |              |              | 5'-3'        |    | 18        | 390        |
| 83075569        | 2,155        |                |              |              | 5'-3'        |    | 23        | 433        |
| 83288932        | 2,55         |                |              |              | 5'-3'        |    | 31        | 434        |
| 83848433        | 1,685        |                |              |              | 5'-3'        |    | 49        | 311        |
| 84120383        | 2,565        |                |              |              | 5'-3'        |    | 40        | 421        |
| 85446772        | 1,775        |                |              |              | 5'-3'        |    | 18        | 459        |
| 85969602        | 2,245        | CADM2          | 5'-3'        | 2            | 5'-3'        | no | 40        | 333        |
| 86696934        | 2,71         |                |              |              | 5'-3'        |    | 34        | 386        |
| 87636925        | 2,65         |                |              |              | 5'-3'        |    | 36        | 374        |
| 89548773        | 2,25         | EPHA3          | 5'-3'        | 10           | 5'-3'        | no | 32        | 504        |
| 89654638        | 2,39         |                |              |              | 5'-3'        |    | 31        | 352        |
| 89856094        | 1,965        |                |              |              | 5'-3'        |    | 21        | 367        |
| 95500863        | 2,08         |                |              |              | 5'-3'        |    | 46        | 458        |
| 96183481        | 1,99         |                |              |              | 5'-3'        |    | 18        | 402        |

|           |       |          |       |                |       |    |    |     |
|-----------|-------|----------|-------|----------------|-------|----|----|-----|
| 99015790  | 2,6   |          |       |                | 5'-3' |    | 31 | 424 |
| 99816263  | 2,255 |          |       |                | 5'-3' |    | 24 | 395 |
| 100009507 | 2,795 | DCBLD2   | 3'-5' | I 13 E 13 I 12 | 5'-3' | ok | 34 | 415 |
| 100377917 | 2,835 |          |       |                | 5'-3' |    | 35 | 417 |
| 100619757 | 2,325 |          |       |                | 5'-3' |    | 41 | 459 |
| 101478759 | 2,725 | TBC1D23  | 5'-3' | I 1            | 5'-3' | no | 35 | 379 |
| 102108155 | 2,45  | ABI3BP   | 3'-5' | I 2            | 5'-3' | ok | 27 | 414 |
| 103144757 | 2,145 |          |       |                | 5'-3' |    | 49 | 415 |
| 103664780 | 2,225 | ZPLD1    | 5'-3' | I 6            | 5'-3' | no | 46 | 429 |
| 105079471 | 1,95  |          |       |                | 5'-3' |    | 18 | 394 |
| 106213661 | 1,34  |          |       |                | 5'-3' |    | 16 | 292 |
| 110944082 | 1,81  |          |       |                | 5'-3' |    | 21 | 482 |
| 112618651 | 2,77  |          |       |                | 5'-3' |    | 34 | 420 |
| 116285676 | 2,19  | ZBTB20   | 3'-5' | I 1            | 5'-3' | ok | 48 | 416 |
| 117891163 | 1,84  |          |       |                | 5'-3' |    | 24 | 506 |
| 119694812 | 1,985 |          |       |                | 5'-3' |    | 27 | 311 |
| 121329662 | 1,935 |          |       |                | 5'-3' |    | 18 | 427 |
| 122217486 | 1,04  | STXBP5L  | 5'-3' | I 4            | 5'-3' | no | 17 | 222 |
| 133161846 | 1,84  | CPNE4    | 3'-5' | I 1            | 5'-3' | ok | 21 | 476 |
| 133697897 | 2,6   | DNAJC13  | 5'-3' | I 35 E 36 I 36 | 5'-3' | no | 39 | 424 |
| 133733894 | 2,195 | DNAJC13  | 5'-3' | I 55           | 5'-3' | no | 46 | 383 |
| 134011580 | 2,245 |          |       |                | 5'-3' |    | 23 | 403 |
| 134606184 | 2,36  | BFSP2    | 5'-3' | I 1            | 5'-3' | no | 34 | 316 |
| 138570516 | 2,605 |          |       |                | 5'-3' |    | 39 | 423 |
| 139997227 | 1,835 |          |       |                | 5'-3' |    | 36 | 211 |
| 141796401 | 2,49  |          |       |                | 5'-3' |    | 39 | 372 |
| 142757264 | 1,735 | RASA2    | 5'-3' | I 6 E 7 I 7    | 5'-3' | no | 43 | 261 |
| 143875607 | 2,34  | PLS1     | 5'-3' | I 4            | 5'-3' | no | 42 | 446 |
| 143938000 | 2,11  | TRPC1    | 5'-3' | E 2 I 2        | 5'-3' | no | 21 | 422 |
| 144724254 | 1,775 | SLC9A9   | 3'-5' | I 9            | 5'-3' | ok | 19 | 469 |
| 146762367 | 2,1   |          |       |                | 5'-3' |    | 21 | 394 |
| 147864895 | 1,615 |          |       |                | 5'-3' |    | 51 | 501 |
| 148368104 | 2,145 |          |       |                | 5'-3' |    | 23 | 383 |
| 154067497 | 2,21  |          |       |                | 5'-3' |    | 46 | 432 |
| 154879909 | 2,31  |          |       |                | 5'-3' |    | 24 | 412 |
| 156294028 | 2,405 | MME      | 5'-3' | I 3            | 5'-3' | no | 43 | 423 |
| 158210135 | 1,92  | FLJ16641 | 5'-3' | I 10           | 5'-3' | no | 19 | 440 |
| 159321508 | 2,345 | RSRC1    | 5'-3' | I 1            | 5'-3' | no | 30 | 353 |
| 159380010 | 2,49  | RSRC1    | 5'-3' | I 3            | 5'-3' | no | 28 | 416 |
| 159870080 | 2,59  | GFM1/LXN | 5'-3' | I 13/E 3 I 2   | 5'-3' | no | 31 | 392 |

|                  |              |              |              |            |              |    |           |            |
|------------------|--------------|--------------|--------------|------------|--------------|----|-----------|------------|
| 160948034        | 2,505        | SCHIP1       | 5'-3'        | 1 1        | 5'-3'        | no | 28        | 413        |
| <b>161194922</b> | <b>2,495</b> | <b>IL12A</b> | <b>5'-3'</b> | <b>1 6</b> | <b>5'-3'</b> | no | <b>28</b> | <b>403</b> |
| 161306812        | 2,655        |              |              |            | 5'-3'        |    | 31        | 405        |
| 163475914        | 2,065        |              |              |            | 5'-3'        |    | 25        | 347        |
| 163730349        | 2,36         |              |              |            | 5'-3'        |    | 26        | 422        |
| 163827517        | 1,775        |              |              |            | 5'-3'        |    | 25        | 529        |
| 164366329        | 2,065        |              |              |            | 5'-3'        |    | 48        | 377        |
| 165873261        | 2,61         |              |              |            | 5'-3'        |    | 33        | 376        |
| 165901425        | 2,785        |              |              |            | 5'-3'        |    | 36        | 401        |
| 166039444        | 2,055        |              |              |            | 5'-3'        |    | 42        | 315        |
| 166372048        | 2,14         |              |              |            | 5'-3'        |    | 48        | 426        |
| 168224439        | 2,015        |              |              |            | 5'-3'        |    | 19        | 397        |
| 168566363        | 2,425        | FLJ23049     | 3'-5'        | E 6   5    | 5'-3'        | ok | 26        | 409        |
| 170441912        | 2,445        | MDS1         | 3'-5'        | 1 2        | 5'-3'        | ok | 28        | 393        |
| 170848764        | 2,305        | MDS1         | 3'-5'        | 1 1        | 5'-3'        | ok | 24        | 405        |
| 172299199        | 2,295        | TNIK         | 3'-5'        | 1 22       | 5'-3'        | ok | 25        | 425        |
| 172994973        | 2,13         |              |              |            | 5'-3'        |    | 49        | 418        |
| 173705836        | 2,625        | TNFSF10      | 3'-5'        | E 5        | 5'-3'        | ok | 37        | 379        |
| 173764463        | 2,77         |              |              |            | 5'-3'        |    | 33        | 408        |
| <b>175253010</b> | <b>2,84</b>  | <b>NLGN1</b> | <b>5'-3'</b> | <b>1 4</b> | <b>5'-3'</b> | no | <b>35</b> | <b>416</b> |
| 175859121        | 2,145        |              |              |            | 5'-3'        |    | 44        | 353        |
| 176364094        | 2,385        | NAALADL2     | 5'-3'        | 1 2        | 5'-3'        | no | 40        | 457        |
| 178288638        | 1,84         | TBL1XR1      | 3'-5'        | 1 2        | 5'-3'        | ok | 18        | 446        |
| 178340408        | 2,17         | TBL1XR1      | 3'-5'        | 1 1        | 5'-3'        | ok | 40        | 500        |
| 178373878        | 2,48         | TBL1XR1      | 3'-5'        | 1 1        | 5'-3'        | ok | 33        | 468        |
| 181230895        | 2,365        | PEX5L        | 3'-5'        | 1 1        | 5'-3'        | ok | 28        | 377        |
| 181922897        | 1,9          |              |              |            | 5'-3'        |    | 22        | 474        |
| 182169362        | 2,715        | FXR1         | 5'-3'        | 1 14       | 5'-3'        | no | 38        | 411        |
| 182326264        | 2,645        |              |              |            | 5'-3'        |    | 34        | 373        |
| 188008146        | 1,96         |              |              |            | 5'-3'        |    | 26        | 502        |
| 189194399        | 2,135        |              |              |            | 5'-3'        |    | 46        | 447        |
| 189242421        | 1,9          |              |              |            | 5'-3'        |    | 41        | 274        |
| 189341250        | 2,525        |              |              |            | 5'-3'        |    | 40        | 429        |
| 189975067        | 2,08         | LPP          | 5'-3'        | 1 8        | 5'-3'        | no | 46        | 360        |
| 190049709        | 2,04         | LPP          | 5'-3'        | 1 8        | 5'-3'        | no | 47        | 456        |
| 190679331        | 2,325        |              |              |            | 5'-3'        |    | 45        | 399        |
| 190725723        | 1,845        |              |              |            | 5'-3'        |    | 45        | 303        |
| 191255906        | 2,055        | LEPREL1      | 3'-5'        | 1 1        | 5'-3'        | ok | 19        | 413        |
| 191291841        | 2,065        | LEPREL1      | 3'-5'        | 1 1        | 5'-3'        | ok | 19        | 411        |
| 192319110        | 1,705        |              |              |            | 5'-3'        |    | 47        | 523        |

|                |             |        |       |           |              |    |           |            |
|----------------|-------------|--------|-------|-----------|--------------|----|-----------|------------|
| 193182275      | 1,985       |        |       |           | 5'-3'        |    | 20        | 381        |
| 193522731      | 2,44        | FGF12  | 3'-5' | 14        | 5'-3'        | ok | 31        | 456        |
| 198480012      | 2,205       | DLG1   | 3'-5' | 14        | 5'-3'        | ok | 26        | 453        |
| 368837         | 1,935       | CHL1   | 5'-3' | 110       | 3'-5'        | ok | 20        | 447        |
| 1570990        | 1,7         |        |       |           | 3'-5'        |    | 16        | 454        |
| 1579665        | 2,545       |        |       |           | 3'-5'        |    | 36        | 353        |
| 1975605        | 2,22        |        |       |           | 3'-5'        |    | 42        | 348        |
| 2357330        | 2,805       | CNTN4  | 5'-3' | 12        | 3'-5'        | ok | 36        | 413        |
| 3197013        | 2,125       |        |       |           | 3'-5'        |    | 20        | 409        |
| 3229711        | 2,49        |        |       |           | 3'-5'        |    | 34        | 342        |
| 3605441        | 1,96        |        |       |           | 3'-5'        |    | 19        | 432        |
| 5307564        | 2,59        |        |       |           | 3'-5'        |    | 32        | 382        |
| 5647334        | 2,47        |        |       |           | 3'-5'        |    | 33        | 470        |
| 6124421        | 2,375       |        |       |           | 3'-5'        |    | 25        | 409        |
| <b>8396155</b> | <b>1,96</b> |        |       |           | <b>3'-5'</b> |    | <b>17</b> | <b>412</b> |
| 9410728        | 2,095       |        |       |           | 3'-5'        |    | 49        | 393        |
| 12299422       | 2,215       |        |       |           | 3'-5'        |    | 26        | 451        |
| 12617977       | 2,52        | RAF1   | 3'-5' | 17        | 3'-5'        | no | 29        | 398        |
| 13096864       | 2,49        |        |       |           | 3'-5'        |    | 33        | 352        |
| 13758693       | 1,93        |        |       |           | 3'-5'        |    | 46        | 488        |
| 15436175       | 2,03        | METTL6 | 3'-5' | 13        | 3'-5'        | no | 23        | 458        |
| 18554774       | 2,42        |        |       |           | 3'-5'        |    | 26        | 408        |
| 19886868       | 2,27        |        |       |           | 3'-5'        |    | 46        | 420        |
| 20130679       | 2,28        | PCAF   | 5'-3' | 16        | 3'-5'        | ok | 28        | 360        |
| 20432740       | 1,635       |        |       |           | 3'-5'        |    | 42        | 587        |
| 20683884       | 2,255       |        |       |           | 3'-5'        |    | 31        | 493        |
| 20897922       | 2,005       |        |       |           | 3'-5'        |    | 20        | 433        |
| 22191771       | 2,665       |        |       |           | 3'-5'        |    | 32        | 421        |
| 23451074       | 2,77        | UBE2E2 | 5'-3' | 13        | 3'-5'        | ok | 34        | 420        |
| 24688765       | 1,865       |        |       |           | 3'-5'        |    | 20        | 461        |
| 26051724       | 2,35        |        |       |           | 3'-5'        |    | 36        | 504        |
| 27299391       | 2,665       | NEK10  | 3'-5' | 15        | 3'-5'        | no | 38        | 397        |
| 27706570       | 2,61        |        |       |           | 3'-5'        |    | 39        | 396        |
| 27800098       | 2,11        |        |       |           | 3'-5'        |    | 20        | 406        |
| 28732349       | 2,575       |        |       |           | 3'-5'        |    | 29        | 409        |
| 29603369       | 1,17        | RBMS3  | 3'-5' | 13 E 4 14 | 3'-5'        | no | 18        | 580        |
| 29746391       | 2,695       | RBMS3  | 3'-5' | 14        | 3'-5'        | no | 33        | 425        |
| 33128205       | 1,145       |        |       |           | 3'-5'        |    | 52        | 585        |
| 33811721       | 1,875       |        |       |           | 3'-5'        |    | 22        | 339        |
| 34248960       | 1,83        |        |       |           | 3'-5'        |    | 51        | 458        |

|           |       |        |       |              |       |    |    |     |
|-----------|-------|--------|-------|--------------|-------|----|----|-----|
| 34873335  | 1,55  |        |       |              | 3'-5' |    | 45 | 244 |
| 35351487  | 2,545 |        |       |              | 3'-5' |    | 35 | 343 |
| 39993842  | 1,8   | MYRIP  | 5'-3' | 2            | 3'-5' | ok | 16 | 384 |
| 41333926  | 2,135 | ULK4   | 3'-5' | 35           | 3'-5' | no | 21 | 417 |
| 42290912  | 2,505 |        |       |              | 3'-5' |    | 29 | 395 |
| 50072906  | 2,43  | RBM6   | 5'-3' | 11 E 12   12 | 3'-5' | ok | 33 | 478 |
| 51114453  | 2,39  | DOCK3  | 5'-3' | 9            | 3'-5' | ok | 33 | 332 |
| 51289237  | 1,65  | DOCK3  | 5'-3' | 25           | 3'-5' | ok | 48 | 524 |
| 53484037  | 2,25  |        |       |              | 3'-5' |    | 47 | 404 |
| 56438769  | 2,51  |        |       |              | 3'-5' |    | 39 | 376 |
| 56586266  | 2,515 | CCDC66 | 5'-3' | 7            | 3'-5' | ok | 33 | 461 |
| 58653083  | 2,28  |        |       |              | 3'-5' |    | 24 | 400 |
| 62864322  | 2,695 |        |       |              | 3'-5' |    | 34 | 435 |
| 65590400  | 1,95  | MAGI1  | 3'-5' | 1            | 3'-5' | no | 50 | 374 |
| 66774083  | 2,785 |        |       |              | 3'-5' |    | 35 | 427 |
| 70867741  | 2,115 |        |       |              | 3'-5' |    | 27 | 481 |
| 71164732  | 1,715 | FOXP1  | 3'-5' | 11           | 3'-5' | no | 17 | 461 |
| 72116060  | 1,415 |        |       |              | 3'-5' |    | 54 | 307 |
| 72473246  | 2,46  |        |       |              | 3'-5' |    | 29 | 432 |
| 74830953  | 2,07  |        |       |              | 3'-5' |    | 20 | 398 |
| 75831774  | 2,02  |        |       |              | 3'-5' |    | 49 | 440 |
| 76255638  | 2,69  |        |       |              | 3'-5' |    | 38 | 416 |
| 77631778  | 2,7   | ROBO2  | 5'-3' | 5            | 3'-5' | ok | 38 | 404 |
| 78183511  | 2,38  |        |       |              | 3'-5' |    | 28 | 380 |
| 79006724  | 2,795 | ROBO1  | 3'-5' | 3            | 3'-5' | no | 36 | 415 |
| 79254106  | 2,695 | ROBO1  | 3'-5' | 2            | 3'-5' | no | 32 | 403 |
| 79985737  | 2,565 |        |       |              | 3'-5' |    | 40 | 397 |
| 82067030  | 1,515 |        |       |              | 3'-5' |    | 18 | 307 |
| 84805750  | 2,39  |        |       |              | 3'-5' |    | 29 | 446 |
| 86122776  | 2,325 | CADM2  | 5'-3' | 8            | 3'-5' | ok | 45 | 399 |
| 87041721  | 2,47  |        |       |              | 3'-5' |    | 43 | 408 |
| 87372620  | 1,57  | CHMP2B | 5'-3' | 1            | 3'-5' | ok | 22 | 278 |
| 87626271  | 1,85  |        |       |              | 3'-5' |    | 20 | 354 |
| 88201008  | 2,56  |        |       |              | 3'-5' |    | 34 | 356 |
| 90196407  | 2,5   |        |       |              | 3'-5' |    | 30 | 434 |
| 95604766  | 2,52  |        |       |              | 3'-5' |    | 32 | 450 |
| 99716446  | 1,64  | CLDND1 | 3'-5' | E 6          | 3'-5' | no | 51 | 322 |
| 100232595 | 2,365 |        |       |              | 3'-5' |    | 25 | 411 |
| 102780998 | 1,55  | PCNP   | 5'-3' | 1 E 2   2    | 3'-5' | ok | 53 | 324 |
| 103473027 | 2,465 |        |       |              | 3'-5' |    | 42 | 397 |

|           |       |        |       |              |       |    |    |     |
|-----------|-------|--------|-------|--------------|-------|----|----|-----|
| 104458711 | 2,37  |        |       |              | 3'-5' |    | 44 | 398 |
| 107238627 | 2,41  |        |       |              | 3'-5' |    | 35 | 316 |
| 107291333 | 1,92  |        |       |              | 3'-5' |    | 16 | 408 |
| 107599424 | 1,915 |        |       |              | 3'-5' |    | 48 | 471 |
| 108735000 | 2,63  | BBX    | 5'-3' | 2            | 3'-5' | ok | 38 | 390 |
| 108809412 | 1,41  | BBX    | 5'-3' | 2            | 3'-5' | ok | 24 | 592 |
| 109877172 | 1,615 | DZIP3  | 5'-3' | 24 E 25   25 | 3'-5' | ok | 54 | 347 |
| 111563461 | 2,84  |        |       |              | 3'-5' |    | 35 | 402 |
| 111766790 | 2,27  |        |       |              | 3'-5' |    | 47 | 408 |
| 111907731 | 1,915 |        |       |              | 3'-5' |    | 46 | 327 |
| 112087658 | 1,97  |        |       |              | 3'-5' |    | 24 | 480 |
| 113895932 | 2,13  |        |       |              | 3'-5' |    | 39 | 300 |
| 114197070 | 1,945 | GTPBP8 | 5'-3' | 2            | 3'-5' | ok | 28 | 293 |
| 115858434 | 2,49  | ZBTB20 | 3'-5' | 5            | 3'-5' | no | 38 | 456 |
| 116624076 | 2,385 |        |       |              | 3'-5' |    | 42 | 381 |
| 117381370 | 1,54  | LSAMP  | 3'-5' | 1            | 3'-5' | no | 26 | 586 |
| 117938429 | 2,365 |        |       |              | 3'-5' |    | 45 | 407 |
| 118159189 | 2,3   |        |       |              | 3'-5' |    | 43 | 374 |
| 118460969 | 2,12  |        |       |              | 3'-5' |    | 44 | 348 |
| 118934755 | 2,135 |        |       |              | 3'-5' |    | 48 | 427 |
| 119337721 | 2,335 |        |       |              | 3'-5' |    | 26 | 391 |
| 123291650 | 2,045 | CD86   | 5'-3' | 1            | 3'-5' | ok | 27 | 495 |
| 124656801 | 2,065 |        |       |              | 3'-5' |    | 38 | 541 |
| 125727992 | 1,95  | KALRN  | 5'-3' | 33           | 3'-5' | ok | 23 | 344 |
| 129971824 | 2,19  | RAB7A  | 5'-3' | 1            | 3'-5' | ok | 38 | 302 |
| 131998690 | 1,095 |        |       |              | 3'-5' |    | 18 | 223 |
| 132122876 | 2,02  | ATP2C1 | 5'-3' | 1            | 3'-5' | ok | 18 | 408 |
| 133147804 | 1,975 | CPNE4  | 3'-5' | 1            | 3'-5' | no | 46 | 479 |
| 136478702 | 2,595 |        |       |              | 3'-5' |    | 36 | 363 |
| 137923277 | 2,42  | STAG1  | 3'-5' | 1            | 3'-5' | no | 42 | 430 |
| 139728799 | 1,81  | CEP70  | 3'-5' | 10           | 3'-5' | no | 50 | 346 |
| 140367105 | 2,46  |        |       |              | 3'-5' |    | 27 | 412 |
| 140589826 | 2,54  | COPB2  | 3'-5' | 1            | 3'-5' | no | 37 | 362 |
| 143667026 | 2,6   | ATR    | 3'-5' | 40           | 3'-5' | no | 39 | 394 |
| 144347769 | 2,185 |        |       |              | 3'-5' |    | 42 | 477 |
| 144588094 | 1,82  | SLC9A9 | 3'-5' | 12           | 3'-5' | no | 16 | 388 |
| 145438150 | 2,165 |        |       |              | 3'-5' |    | 49 | 407 |
| 145445135 | 2,52  |        |       |              | 3'-5' |    | 42 | 410 |
| 149143550 | 2,465 |        |       |              | 3'-5' |    | 41 | 431 |
| 149420613 | 2,105 |        |       |              | 3'-5' |    | 21 | 423 |



|           |       |          |       |                  |       |    |    |     |
|-----------|-------|----------|-------|------------------|-------|----|----|-----|
| 151776812 | 1,95  | EIF2A    | 5'-3' | I 11             | 3'-5' | ok | 50 | 374 |
| 152858371 | 2,5   |          |       |                  | 3'-5' |    | 40 | 384 |
| 153979140 | 2,275 |          |       |                  | 3'-5' |    | 26 | 379 |
| 153982135 | 2,075 |          |       |                  | 3'-5' |    | 22 | 379 |
| 154642902 | 2,225 |          |       |                  | 3'-5' |    | 45 | 439 |
| 158227275 | 2,19  | FIJ16641 | 5'-3' | I 12             | 3'-5' | ok | 45 | 372 |
| 161930008 | 2,605 |          |       |                  | 3'-5' |    | 38 | 433 |
| 161959548 | 1,865 | PPM1L    | 5'-3' | I 1              | 3'-5' | ok | 19 | 367 |
| 162959919 | 2,12  |          |       |                  | 3'-5' |    | 32 | 288 |
| 163156616 | 2,555 |          |       |                  | 3'-5' |    | 30 | 395 |
| 164114625 | 2,54  |          |       |                  | 3'-5' |    | 36 | 352 |
| 165171757 | 2,22  |          |       |                  | 3'-5' |    | 48 | 408 |
| 165902065 | 2,05  |          |       |                  | 3'-5' |    | 49 | 384 |
| 168827870 | 2,685 | WDR49    | 3'-5' | I 1              | 3'-5' | no | 35 | 371 |
| 169418533 | 1,475 |          |       |                  | 3'-5' |    | 44 | 219 |
| 169805069 | 2,42  |          |       |                  | 3'-5' |    | 42 | 430 |
| 173334959 | 2,035 | FNDC3B   | 5'-3' | I 2              | 3'-5' | ok | 50 | 427 |
| 176608530 | 1,955 | NAALADL2 | 5'-3' | I 5              | 3'-5' | ok | 53 | 405 |
| 176906214 | 2,03  | NAALADL2 | 5'-3' | I 11             | 3'-5' | ok | 22 | 448 |
| 177064534 | 1,63  |          |       |                  | 3'-5' |    | 16 | 350 |
| 177183978 | 1,795 |          |       |                  | 3'-5' |    | 32 | 595 |
| 178207903 | 2,17  |          |       |                  | 3'-5' |    | 49 | 410 |
| 179035733 | 2,465 |          |       |                  | 3'-5' |    | 42 | 397 |
| 179574953 | 2,36  |          |       |                  | 3'-5' |    | 25 | 406 |
| 180843534 | 2,245 |          |       |                  | 3'-5' |    | 47 | 415 |
| 181419688 | 2,585 |          |       |                  | 3'-5' |    | 30 | 417 |
| 182090805 | 2,475 |          |       |                  | 3'-5' |    | 43 | 409 |
| 182162953 | 1,92  | FXR1     | 5'-3' | 11 E 12 I 12 E 1 | 3'-5' | ok | 42 | 530 |
| 182732589 | 2,255 |          |       |                  | 3'-5' |    | 23 | 405 |
| 183585446 | 2,12  |          |       |                  | 3'-5' |    | 49 | 420 |
| 183692432 | 2,68  |          |       |                  | 3'-5' |    | 38 | 418 |
| 183897016 | 2,31  |          |       |                  | 3'-5' |    | 26 | 432 |
| 184011020 | 1     | ATP11B   | 5'-3' | I 1              | 3'-5' | ok | 16 | 224 |
| 185347034 | 1,885 |          |       |                  | 3'-5' |    | 53 | 427 |
| 189221302 | 2,03  |          |       |                  | 3'-5' |    | 25 | 478 |
| 190824017 | 2,345 |          |       |                  | 3'-5' |    | 36 | 505 |
| 192557778 | 2,035 | CCDC50   | 5'-3' | I 2              | 3'-5' | ok | 44 | 331 |
| 192753029 | 2,555 |          |       |                  | 3'-5' |    | 30 | 395 |
| 196545375 | 1,84  | CENTB2   | 3'-5' | I 5              | 3'-5' | no | 41 | 262 |
| 196885928 | 1,655 | SDHA     | 5'-3' | E 10 I 10        | 3'-5' | ok | 47 | 285 |

|             |                 |              |              |              |           |              |            |             |               |
|-------------|-----------------|--------------|--------------|--------------|-----------|--------------|------------|-------------|---------------|
|             | 198633974       | 1,485        |              |              |           | 3'-5'        |            | 45          | 587           |
|             | 198959323       | 2,295        |              |              |           | 3'-5'        |            | 27          | 373           |
| Ø           |                 |              |              | <b>66</b>    |           |              | <b>120</b> | <b>33,9</b> | <b>406,27</b> |
|             |                 |              |              | <b>54</b>    |           |              | <b>56</b>  | <b>33,6</b> | <b>409,88</b> |
|             |                 |              |              | <b>120</b>   |           |              | <b>64</b>  | <b>34,1</b> | <b>404,1</b>  |
| <b>4</b>    | 655452          | 1,97         |              |              | <b>1</b>  | 5'-3'        |            | 43          | 308           |
|             | 4641068         | 2,37         |              |              |           | 5'-3'        |            | 45          | 410           |
| 295 results | 6887166         | 2,3          | KIAA0232     | 3'-5'        | <b>13</b> | 5'-3'        | ok         | 30          | 344           |
|             | 10884323        | 1,9          |              |              |           | 5'-3'        |            | 21          | 354           |
|             | 11164606        | 1,76         |              |              |           | 5'-3'        |            | 16          | 442           |
|             | 12618092        | 2,24         |              |              |           | 5'-3'        |            | 45          | 382           |
|             | 17505160        | 2,655        | LCORL        | 3'-5'        | <b>15</b> | 5'-3'        | ok         | 31          | 405           |
|             | 18541852        | 2,19         |              |              |           | 5'-3'        |            | 23          | 426           |
|             | 19744867        | 1,7          |              |              |           | 5'-3'        |            | 51          | 484           |
|             | 20691190        | 1,755        | KCNIP4       | 3'-5'        | <b>11</b> | 5'-3'        | ok         | 50          | 335           |
|             | 22474522        | 2,21         |              |              |           | 5'-3'        |            | 47          | 422           |
|             | 22621487        | 2,745        |              |              |           | 5'-3'        |            | 34          | 425           |
|             | 23989253        | 2,55         |              |              |           | 5'-3'        |            | 30          | 394           |
|             | 29421278        | 2,515        |              |              |           | 5'-3'        |            | 33          | 461           |
|             | 29650237        | 1,865        |              |              |           | 5'-3'        |            | 50          | 357           |
|             | 29898854        | 2,755        |              |              |           | 5'-3'        |            | 34          | 423           |
|             | 31599793        | 1,465        |              |              |           | 5'-3'        |            | 17          | 307           |
|             | 33006953        | 2,6          |              |              |           | 5'-3'        |            | 34          | 364           |
|             | 34012078        | 2,055        |              |              |           | 5'-3'        |            | 46          | 355           |
|             | 34042682        | 1,535        |              |              |           | 5'-3'        |            | 17          | 321           |
|             | 34601788        | 2,435        |              |              |           | 5'-3'        |            | 42          | 391           |
|             | 36369653        | 1,525        |              |              |           | 5'-3'        |            | 44          | 229           |
|             | 36382550        | 2,115        |              |              |           | 5'-3'        |            | 48          | 431           |
|             | <b>40670981</b> | <b>1,905</b> | <b>APBB2</b> | <b>3'-5'</b> | <b>16</b> | <b>5'-3'</b> | ok         | <b>44</b>   | <b>305</b>    |
|             | 41507389        | 1,94         |              |              |           | 5'-3'        |            | 20          | 446           |
|             | 42265800        | 2,805        | ATP8A1       | 3'-5'        | <b>15</b> | 5'-3'        | ok         | 35          | 423           |
|             | 42774618        | 2,77         |              |              | <b>15</b> | 5'-3'        |            | 33          | 408           |
|             | 44388884        | 1,555        | GUF1         | 5'-3'        | <b>13</b> | 5'-3'        | no         | 21          | 285           |
|             | 45770156        | 2,13         | GABRB1       | 5'-3'        | <b>13</b> | 5'-3'        | no         | 49          | 418           |

|          |       |          |       |             |       |    |    |     |
|----------|-------|----------|-------|-------------|-------|----|----|-----|
| 46857429 | 2,745 | GABRB1   | 5'-3' | 1 3 E 4     | 5'-3' | no | 35 | 435 |
| 52789551 | 1,87  |          |       |             | 5'-3' |    | 34 | 218 |
| 53471315 | 2,695 | SCFD2    | 3'-5' | 1 6         | 5'-3' | ok | 37 | 425 |
| 55466254 | 1,77  |          |       |             | 5'-3' |    | 32 | 218 |
| 55896597 | 2,115 |          |       |             | 5'-3' |    | 48 | 431 |
| 58517131 | 1,945 |          |       |             | 5'-3' |    | 21 | 455 |
| 59641317 | 2,505 |          |       |             | 5'-3' |    | 39 | 375 |
| 60711891 | 2,63  |          |       |             | 5'-3' |    | 34 | 370 |
| 61165423 | 2,225 |          |       |             | 5'-3' |    | 44 | 369 |
| 61507140 | 2,15  |          |       |             | 5'-3' |    | 35 | 264 |
| 61742799 | 2,025 |          |       |             | 5'-3' |    | 19 | 419 |
| 62235562 | 2,65  | LPHN3    | 5'-3' | 1 3         | 5'-3' | no | 31 | 404 |
| 62540581 | 2,375 | LPHN3    | 5'-3' | 1 16        | 5'-3' | no | 44 | 419 |
| 63133906 | 2,585 |          |       |             | 5'-3' |    | 30 | 401 |
| 64573101 | 2,215 |          |       |             | 5'-3' |    | 30 | 491 |
| 65044736 | 2,305 |          |       |             | 5'-3' |    | 44 | 385 |
| 65589827 | 2,52  |          |       |             | 5'-3' |    | 35 | 480 |
| 66672734 | 2,31  |          |       |             | 5'-3' |    | 46 | 406 |
| 69831278 | 2,41  | UGT2A3   | 3'-5' | 1 4 E 4 1 3 | 5'-3' | ok | 43 | 422 |
| 70464924 | 1,935 |          |       |             | 5'-3' |    | 17 | 417 |
| 70766388 | 2,23  |          |       |             | 5'-3' |    | 26 | 448 |
| 72643136 | 2,265 | SLC4A4   | 5'-3' | 1 19        | 5'-3' | no | 25 | 387 |
| 74207632 | 2,26  | ANKRD17  | 3'-5' | 1 18        | 5'-3' | ok | 31 | 326 |
| 74894915 | 2,415 |          |       |             | 5'-3' |    | 44 | 411 |
| 80013449 | 1,52  | BMP2K    | 5'-3' | 1 13        | 5'-3' | no | 51 | 520 |
| 82518331 | 2,705 |          |       |             | 5'-3' |    | 32 | 405 |
| 83243263 | 1,89  |          |       |             | 5'-3' |    | 49 | 352 |
| 84394129 | 2,4   |          |       |             | 5'-3' |    | 40 | 454 |
| 84615537 | 2,575 | CCDC98   | 3'-5' | 1 3         | 5'-3' | ok | 41 | 409 |
| 85965237 | 1,9   | WDFY3    | 3'-5' | 1 10        | 5'-3' | ok | 19 | 444 |
| 87237265 | 1,93  | MAPK10   | 3'-5' | 1 9         | 5'-3' | ok | 25 | 320 |
| 89283230 | 2,245 | ABCG2    | 3'-5' | 1 1         | 5'-3' | ok | 47 | 403 |
| 91772575 | 2,645 | MGC48628 | 5'-3' | 1 6         | 5'-3' | no | 37 | 435 |
| 91855192 | 1,33  | MGC48628 | 5'-3' | 1 6         | 5'-3' | no | 47 | 220 |
| 93657852 | 2,255 | GRID2    | 5'-3' | 1 1         | 5'-3' | no | 44 | 443 |
| 94422125 | 2,06  | GRID2    | 5'-3' | 1 8         | 5'-3' | no | 45 | 346 |
| 96503288 | 2,215 | UNC5C    | 3'-5' | 1 1         | 5'-3' | ok | 47 | 421 |
| 97364710 | 2,51  |          |       |             | 5'-3' |    | 30 | 432 |
| 97524758 | 1,97  |          |       |             | 5'-3' |    | 17 | 408 |
| 98660695 | 2,145 |          |       |             | 5'-3' |    | 47 | 435 |

|                  |              |             |              |                |              |           |           |            |
|------------------|--------------|-------------|--------------|----------------|--------------|-----------|-----------|------------|
| 100019264        | 2,14         |             |              |                | 5'-3'        |           | 48        | 426        |
| 103040195        | 2,565        | BANK1       | 5'-3'        | 1 6            | 5'-3'        | no        | 35        | 347        |
| 104466852        | 1,865        |             |              |                | 5'-3'        |           | 50        | 357        |
| 104577484        | 2,055        |             |              |                | 5'-3'        |           | 25        | 345        |
| 105891272        | 2,435        |             |              |                | 5'-3'        |           | 41        | 381        |
| 106079702        | 2,435        |             |              |                | 5'-3'        |           | 38        | 351        |
| 109345602        | 2,61         |             |              |                | 5'-3'        |           | 30        | 412        |
| 112174435        | 2,425        |             |              |                | 5'-3'        |           | 29        | 379        |
| 112856637        | 2,245        |             |              |                | 5'-3'        |           | 23        | 415        |
| 114581884        | 2,755        |             |              |                | 5'-3'        |           | 37        | 405        |
| 116151874        | 2,74         | NDST4       | 3'-5'        | 1 2            | 5'-3'        | ok        | 37        | 416        |
| 117433621        | 2,16         |             |              |                | 5'-3'        |           | 49        | 406        |
| 117631048        | 2,315        |             |              |                | 5'-3'        |           | 29        | 357        |
| 117789315        | 2,32         |             |              |                | 5'-3'        |           | 45        | 420        |
| 118075000        | 2,8          |             |              |                | 5'-3'        |           | 34        | 404        |
| 120047020        | 2,715        | SYNPO2      | 5'-3'        | 1 1            | 5'-3'        | no        | 38        | 407        |
| 120111147        | 2,575        | SYNPO2      | 5'-3'        | 1 1            | 5'-3'        | no        | 30        | 399        |
| 120727143        | 2,715        | PDE5A       | 3'-5'        | 1 3            | 5'-3'        | ok        | 34        | 387        |
| 121955200        | 1,735        | PRDM5       | 3'-5'        | 1 7            | 5'-3'        | ok        | 51        | 477        |
| 122052841        | 2,63         | PRDM5       | 3'-5'        | 1 1            | 5'-3'        | ok        | 39        | 418        |
| 123414826        | 2,195        | KIAA1109    | 5'-3'        | 1 46 E 47 I 47 | 5'-3'        | no        | 25        | 373        |
| 124723482        | 1,855        |             |              |                | 5'-3'        |           | 45        | 513        |
| 124924251        | 2,525        |             |              |                | 5'-3'        |           | 36        | 349        |
| 128274756        | 2            |             |              |                | 5'-3'        |           | 31        | 274        |
| 131207488        | 2,02         |             |              |                | 5'-3'        |           | 44        | 490        |
| 133322957        | 2,14         |             |              |                | 5'-3'        |           | 21        | 416        |
| 134411802        | 2,73         |             |              |                | 5'-3'        |           | 33        | 400        |
| 134616900        | 1,615        |             |              |                | 5'-3'        |           | 45        | 561        |
| 135504691        | 2,265        |             |              |                | 5'-3'        |           | 30        | 481        |
| 138961111        | 2,315        |             |              |                | 5'-3'        |           | 24        | 407        |
| 139778937        | 2,595        |             |              |                | 5'-3'        |           | 31        | 393        |
| 141193605        | 1,845        | MAML3       | 3'-5'        | 1 1            | 5'-3'        | ok        | 19        | 455        |
| 143409639        | 1,86         | INPP4B      | 3'-5'        | 1 7            | 5'-3'        | ok        | 17        | 432        |
| 145010187        | 2,325        |             |              |                | 5'-3'        |           | 39        | 479        |
| 145793723        | 2,25         | HHIP        | 5'-3'        | 1 2            | 5'-3'        | no        | 47        | 404        |
| 146944510        | 2,72         | LOC152485   | 3'-5'        | 1 8            | 5'-3'        | ok        | 33        | 420        |
| 151447039        | 2,47         | LRBA        | 3'-5'        | 1 53           | 5'-3'        | ok        | 36        | 480        |
| <b>151558698</b> | <b>2,065</b> | <b>LRBA</b> | <b>3'-5'</b> | <b>1 47</b>    | <b>5'-3'</b> | <b>ok</b> | <b>49</b> | <b>431</b> |
| 152080516        | 1,985        | LRBA        | 3'-5'        | 1 2            | 5'-3'        | ok        | 28        | 517        |
| 152546545        | 2,22         |             |              |                | 5'-3'        |           | 28        | 470        |

|           |       |           |       |      |       |    |    |     |
|-----------|-------|-----------|-------|------|-------|----|----|-----|
| 152546647 | 2,37  |           |       |      | 5'-3' |    | 28 | 378 |
| 152662008 | 2,295 | LOC729830 | 5'-3' | 1 3  | 5'-3' | no | 30 | 475 |
| 155490864 | 2,765 | DCHS2     | 3'-5' | 1 6  | 5'-3' | ok | 33 | 411 |
| 155918700 | 2,56  |           |       |      | 5'-3' |    | 37 | 452 |
| 156090938 | 2,605 |           |       |      | 5'-3' |    | 33 | 375 |
| 156246634 | 1,855 |           |       |      | 5'-3' |    | 16 | 423 |
| 161336453 | 2,71  |           |       |      | 5'-3' |    | 32 | 412 |
| 162172746 | 2,495 |           |       |      | 5'-3' |    | 29 | 393 |
| 162854071 | 2,34  | FSTL5     | 3'-5' | 1 6  | 5'-3' | ok | 27 | 382 |
| 163402671 | 2,625 |           |       |      | 5'-3' |    | 31 | 419 |
| 163971833 | 2,835 |           |       |      | 5'-3' |    | 35 | 401 |
| 164560583 | 2,355 |           |       |      | 5'-3' |    | 28 | 375 |
| 165357573 | 1,89  |           |       |      | 5'-3' |    | 18 | 382 |
| 167689773 | 2,35  |           |       |      | 5'-3' |    | 32 | 484 |
| 167727541 | 2,21  |           |       |      | 5'-3' |    | 43 | 356 |
| 168116312 | 2,66  | SPOCK3    | 3'-5' | 1 4  | 5'-3' | ok | 32 | 396 |
| 170015570 | 2,155 | PALLD     | 5'-3' | 1 10 | 5'-3' | no | 21 | 413 |
| 170384127 | 2,295 | SH3RF1    | 3'-5' | 1 2  | 5'-3' | ok | 42 | 455 |
| 171408987 | 2,065 |           |       |      | 5'-3' |    | 25 | 471 |
| 172983746 | 2,395 | GALNT17   | 5'-3' | 1 2  | 5'-3' | no | 26 | 403 |
| 174738083 | 1,98  |           |       |      | 5'-3' |    | 18 | 400 |
| 177475032 | 1,765 |           |       |      | 5'-3' |    | 15 | 387 |
| 180028259 | 2,28  |           |       |      | 5'-3' |    | 46 | 400 |
| 181194494 | 1,91  |           |       |      | 5'-3' |    | 44 | 306 |
| 181345624 | 1,89  |           |       |      | 5'-3' |    | 45 | 312 |
| 182652039 | 2,62  |           |       |      | 5'-3' |    | 40 | 408 |
| 183281811 | 2,735 |           |       |      | 5'-3' |    | 34 | 391 |
| 184229479 | 2,7   |           |       |      | 5'-3' |    | 32 | 414 |
| 188150887 | 2,625 |           |       |      | 5'-3' |    | 31 | 419 |
| 189901877 | 1,98  |           |       |      | 5'-3' |    | 48 | 458 |
| 190238994 | 2,235 |           |       |      | 5'-3' |    | 23 | 417 |
| 5693684   | 2,775 | EVC2      | 3'-5' | 1 9  | 3'-5' | no | 37 | 409 |
| 8501896   | 2,56  |           |       |      | 3'-5' |    | 41 | 406 |
| 10132874  | 2,18  | MIST      | 3'-5' | 1 14 | 3'-5' | no | 43 | 350 |
| 11960517  | 1,965 |           |       |      | 3'-5' |    | 53 | 411 |
| 11964941  | 2,405 |           |       |      | 3'-5' |    | 43 | 423 |
| 13022952  | 2,81  | RAB28     | 3'-5' | 1 4  | 3'-5' | no | 34 | 406 |
| 13859771  | 2,555 |           |       |      | 3'-5' |    | 29 | 413 |
| 14383072  | 2,25  |           |       |      | 3'-5' |    | 35 | 534 |
| 16046334  | 1,815 |           |       |      | 3'-5' |    | 19 | 357 |

|                 |             |              |              |                |              |           |           |            |
|-----------------|-------------|--------------|--------------|----------------|--------------|-----------|-----------|------------|
| 16120853        | 1,405       | LDB2         | 3'-5'        | 1 6            | 3'-5'        | no        | 24        | 593        |
| 16849254        | 2,645       |              |              |                | 3'-5'        |           | 37        | 435        |
| 18390963        | 2,105       |              |              |                | 3'-5'        |           | 50        | 413        |
| 19637038        | 2,7         |              |              |                | 3'-5'        |           | 35        | 444        |
| 20311986        | 2,52        | C4orf28      | 5'-3'        | 1 1            | 3'-5'        | ok        | 42        | 410        |
| 20832592        | 2,01        | KCNIP4       | 3'-5'        | 1 1            | 3'-5'        | no        | 23        | 462        |
| 20961744        | 2,055       | KCNIP4       | 3'-5'        | 1 1            | 3'-5'        | no        | 27        | 493        |
| 21750274        | 2,675       |              |              |                | 3'-5'        |           | 33        | 389        |
| 23268745        | 2,175       |              |              |                | 3'-5'        |           | 25        | 449        |
| 24759689        | 1,635       | SEPSECS      | 3'-5'        | 1 5            | 3'-5'        | no        | 40        | 607        |
| 25300417        | 1,985       |              |              |                | 3'-5'        |           | 32        | 261        |
| 25386608        | 1,695       | KIAA0746     | 3'-5'        | 1 17 E 17 I 16 | 3'-5'        | no        | 22        | 515        |
| 28481393        | 1,9         |              |              |                | 3'-5'        |           | 43        | 524        |
| 29742377        | 2,595       |              |              |                | 3'-5'        |           | 33        | 445        |
| 30146315        | 2,565       |              |              |                | 3'-5'        |           | 41        | 407        |
| 33015721        | 2,43        |              |              |                | 3'-5'        |           | 41        | 438        |
| 34748645        | 2,825       |              |              |                | 3'-5'        |           | 34        | 409        |
| 37142224        | 2,085       | C4orf19      | 5'-3'        | 1 1            | 3'-5'        | ok        | 21        | 391        |
| 38175809        | 2,465       |              |              |                | 3'-5'        |           | 29        | 387        |
| 41427336        | 2,52        |              |              |                | 3'-5'        |           | 36        | 348        |
| 41471799        | 2,345       |              |              |                | 3'-5'        |           | 25        | 403        |
| 45192157        | 2,82        |              |              |                | 3'-5'        |           | 36        | 410        |
| 45747115        | 1,885       | GABRG1       | 3'-5'        | 1 8            | 3'-5'        | no        | 49        | 351        |
| 47742217        | 1,675       |              |              |                | 3'-5'        |           | 29        | 229        |
| 48273535        | 2,06        | FRYL         | 3'-5'        | 1 21           | 3'-5'        | no        | 31        | 532        |
| 52468893        | 1,76        | DCUN1D4      | 5'-3'        | 1 8            | 3'-5'        | ok        | 49        | 326        |
| 58699469        | 1,58        |              |              |                | 3'-5'        |           | 51        | 508        |
| 59350207        | 2,13        |              |              |                | 3'-5'        |           | 22        | 390        |
| 59351292        | 1,81        |              |              |                | 3'-5'        |           | 49        | 482        |
| 59804312        | 2,295       |              |              |                | 3'-5'        |           | 31        | 485        |
| 59993811        | 2,44        |              |              |                | 3'-5'        |           | 41        | 436        |
| 61189947        | 2,7         |              |              |                | 3'-5'        |           | 35        | 444        |
| <b>62329201</b> | <b>2,34</b> | <b>LPHN3</b> | <b>5'-3'</b> | <b>1 5</b>     | <b>3'-5'</b> | <b>ok</b> | <b>30</b> | <b>466</b> |
| 63967242        | 1,805       |              |              |                | 3'-5'        |           | 50        | 473        |
| 64781785        | 2,07        |              |              |                | 3'-5'        |           | 48        | 378        |
| 64793494        | 2,385       |              |              |                | 3'-5'        |           | 27        | 427        |
| 65329530        | 2,37        |              |              |                | 3'-5'        |           | 42        | 378        |
| 66680582        | 1,895       |              |              |                | 3'-5'        |           | 51        | 373        |
| 67037600        | 1,985       |              |              |                | 3'-5'        |           | 47        | 351        |
| 67189210        | 2,415       |              |              |                | 3'-5'        |           | 44        | 407        |

|                  |             |                 |              |            |              |    |           |            |
|------------------|-------------|-----------------|--------------|------------|--------------|----|-----------|------------|
| 69251675         | 2,185       |                 |              |            | 3'-5'        |    | 25        | 447        |
| 69603675         | 2,185       |                 |              |            | 3'-5'        |    | 25        | 447        |
| 70149347         | 2,41        |                 |              |            | 3'-5'        |    | 43        | 422        |
| 70256715         | 2,34        |                 |              |            | 3'-5'        |    | 43        | 436        |
| 70436047         | 2,355       |                 |              |            | 3'-5'        |    | 45        | 405        |
| 70965890         | 2,42        |                 |              |            | 3'-5'        |    | 39        | 358        |
| 73087917         | 2,225       |                 |              |            | 3'-5'        |    | 42        | 469        |
| 73200256         | 2,715       | NPFFR2          | 5'-3'        | 1 1        | 3'-5'        | ok | 36        | 431        |
| 73912602         | 2,26        |                 |              |            | 3'-5'        |    | 47        | 412        |
| 76233047         | 2,585       |                 |              |            | 3'-5'        |    | 40        | 417        |
| 78521864         | 2,1         |                 |              |            | 3'-5'        |    | 44        | 344        |
| 78547450         | 2,385       |                 |              |            | 3'-5'        |    | 42        | 437        |
| 79542071         | 2,56        | FRAS1           | 5'-3'        | 1 30       | 3'-5'        | ok | 29        | 412        |
| 83981944         | 2,455       | SEC31A          | 3'-5'        | 1 22 E 22  | 3'-5'        | no | 27        | 405        |
| <b>87040883</b>  | <b>2,14</b> | <b>ARHGAP24</b> | <b>5'-3'</b> | <b>1 3</b> | <b>3'-5'</b> | ok | <b>22</b> | <b>426</b> |
| 87663820         | 2,185       |                 |              |            | 3'-5'        |    | 23        | 427        |
| 91578035         | 2,485       | MGC48628        | 5'-3'        | 1 4        | 3'-5'        | ok | 30        | 381        |
| 91764513         | 2,03        | MGC48628        | 5'-3'        | 1 5        | 3'-5'        | ok | 47        | 360        |
| 91919728         | 2,44        | MGC48628        | 5'-3'        | 1 7        | 3'-5'        | ok | 42        | 392        |
| 95100071         | 2,675       |                 |              |            | 3'-5'        |    | 31        | 409        |
| 95207506         | 2,285       |                 |              |            | 3'-5'        |    | 29        | 351        |
| 96403394         | 2,235       | UNC5C           | 5'-3'        | 1 4        | 3'-5'        | ok | 43        | 457        |
| 96454777         | 2,165       | UNC5C           | 5'-3'        | 1 2        | 3'-5'        | ok | 21        | 407        |
| 96972505         | 2,22        |                 |              |            | 3'-5'        |    | 48        | 410        |
| 97355725         | 2,43        |                 |              |            | 3'-5'        |    | 40        | 448        |
| 98321491         | 1,795       |                 |              |            | 3'-5'        |    | 54        | 435        |
| 100173631        | 2,525       | METAP1          | 5'-3'        | 1 2        | 3'-5'        | ok | 29        | 399        |
| <b>100273562</b> | <b>2,11</b> | <b>ADH4</b>     | <b>3'-5'</b> | <b>1 5</b> | <b>3'-5'</b> | no | <b>43</b> | <b>336</b> |
| 100899557        | 2,46        |                 |              |            | 3'-5'        |    | 36        | 336        |
| 105823918        | 2,12        |                 |              |            | 3'-5'        |    | 21        | 420        |
| 106128642        | 1,755       |                 |              |            | 3'-5'        |    | 53        | 365        |
| 106431095        | 1,94        |                 |              |            | 3'-5'        |    | 18        | 426        |
| 107927818        | 2,4         |                 |              |            | 3'-5'        |    | 40        | 364        |
| 109381194        | 1,79        |                 |              |            | 3'-5'        |    | 24        | 302        |
| 109463953        | 1,79        |                 |              |            | 3'-5'        |    | 38        | 596        |
| 110957823        | 2,135       | NOLA1           | 5'-3'        | 1 2        | 3'-5'        | ok | 49        | 417        |
| 115045241        | 2,67        | ARSJ            | 3'-5'        | 1 2        | 3'-5'        | no | 33        | 388        |
| 116205315        | 2,22        | NDST4           | 3'-5'        | 1 2        | 3'-5'        | no | 24        | 430        |
| 117544141        | 2,65        |                 |              |            | 3'-5'        |    | 33        | 434        |
| 118118125        | 1,945       |                 |              |            | 3'-5'        |    | 43        | 303        |

|                  |              |               |              |             |              |    |           |            |
|------------------|--------------|---------------|--------------|-------------|--------------|----|-----------|------------|
| 118365061        | 2,425        |               |              |             | 3'-5'        |    | 40        | 449        |
| 119624523        | 1,81         |               |              |             | 3'-5'        |    | 22        | 492        |
| 120062656        | 2,13         | SYNPO2        | 5'-3'        | 1 1         | 3'-5'        | ok | 41        | 320        |
| 121494191        | 1,535        |               |              |             | 3'-5'        |    | 19        | 301        |
| 121556234        | 2,515        |               |              |             | 3'-5'        |    | 37        | 461        |
| <b>124251630</b> | <b>2,425</b> | <b>SPATA5</b> | <b>5'-3'</b> | <b>1 14</b> | <b>3'-5'</b> | ok | <b>26</b> | <b>409</b> |
| 124362520        | 2,765        | SPATA5        | 5'-3'        | 1 14        | 3'-5'        | ok | 35        | 387        |
| 124740772        | 2,61         |               |              |             | 3'-5'        |    | 39        | 422        |
| 124834162        | 2,125        |               |              |             | 3'-5'        |    | 24        | 449        |
| 125403195        | 2,615        |               |              |             | 3'-5'        |    | 34        | 367        |
| 125471766        | 2,455        |               |              |             | 3'-5'        |    | 27        | 413        |
| 126130514        | 2,135        |               |              |             | 3'-5'        |    | 23        | 381        |
| 126595716        | 2,02         | FAT4          | 5'-3'        | 1 9         | 3'-5'        | ok | 43        | 318        |
| 127142234        | 2,11         |               |              |             | 3'-5'        |    | 21        | 422        |
| 128546768        | 2,61         |               |              |             | 3'-5'        |    | 30        | 412        |
| 129162665        | 2,57         | C4orf29       | 5'-3'        | 1 9         | 3'-5'        | ok | 41        | 408        |
| 131167128        | 1,7          |               |              |             | 3'-5'        |    | 50        | 494        |
| 132014640        | 1,79         |               |              |             | 3'-5'        |    | 23        | 506        |
| 133458763        | 2,76         |               |              |             | 3'-5'        |    | 35        | 386        |
| 133643413        | 2,395        |               |              |             | 3'-5'        |    | 26        | 403        |
| 133813535        | 2,72         |               |              |             | 3'-5'        |    | 37        | 398        |
| 133998636        | 2,22         |               |              |             | 3'-5'        |    | 25        | 440        |
| 134997722        | 2,555        |               |              |             | 3'-5'        |    | 39        | 433        |
| 136270298        | 1,82         |               |              |             | 3'-5'        |    | 22        | 490        |
| 138352509        | 2,685        |               |              |             | 3'-5'        |    | 32        | 417        |
| 139084911        | 2,855        |               |              |             | 3'-5'        |    | 35        | 405        |
| 139540119        | 2,09         |               |              |             | 3'-5'        |    | 50        | 402        |
| 143500717        | 2,22         | INPP4B        | 3'-5'        | 1 4         | 3'-5'        | no | 47        | 420        |
| 143635435        | 2,075        | INPP4B        | 3'-5'        | 1 2         | 3'-5'        | no | 33        | 549        |
| 144423774        | 2,465        |               |              |             | 3'-5'        |    | 41        | 431        |
| 145429050        | 2,17         |               |              |             | 3'-5'        |    | 37        | 530        |
| 147729456        | 1,62         |               |              |             | 3'-5'        |    | 41        | 600        |
| 152582837        | 1,9          | LOC729830     | 5'-3'        | 1 1         | 3'-5'        | ok | 22        | 474        |
| 153123229        | 2,2          |               |              |             | 3'-5'        |    | 41        | 484        |
| 153846228        | 2,225        |               |              |             | 3'-5'        |    | 46        | 429        |
| 155293993        | 1,37         |               |              |             | 3'-5'        |    | 48        | 580        |
| 155442104        | 2,135        | DCHS2         | 3'-5'        | 1 17        | 3'-5'        | no | 38        | 291        |
| 156241679        | 2,445        |               |              |             | 3'-5'        |    | 38        | 465        |
| 156586443        | 2,185        |               |              |             | 3'-5'        |    | 45        | 371        |
| 156978274        | 1,505        | ACCN5         | 3'-5'        | 1 7         | 3'-5'        | no | 24        | 245        |



|                  |              |                |              |             |              |           |              |               |
|------------------|--------------|----------------|--------------|-------------|--------------|-----------|--------------|---------------|
| 157209133        | 2,235        |                |              |             | 3'-5'        |           | 47           | 401           |
| 159053292        | 1,895        |                |              |             | 3'-5'        |           | 52           | 435           |
| <b>162537727</b> | <b>2,005</b> | <b>FSTL5</b>   | <b>5'-3'</b> | <b>I 15</b> | <b>3'-5'</b> | ok        | <b>51</b>    | <b>395</b>    |
| 162861432        | 1,7          | FSTL5          | 5'-3'        | I 6         | 3'-5'        | ok        | 54           | 454           |
| 164311594        | 2,375        |                |              |             | 3'-5'        |           | 26           | 399           |
| 164760716        | 2,035        |                |              |             | 3'-5'        |           | 47           | 361           |
| 164848965        | 2,555        |                |              |             | 3'-5'        |           | 39           | 385           |
| 164880755        | 1,005        |                |              |             | 3'-5'        |           | 17           | 603           |
| 165636226        | 1,68         |                |              |             | 3'-5'        |           | 54           | 458           |
| 166941791        | 2,125        |                |              |             | 3'-5'        |           | 27           | 479           |
| 167790721        | 2,42         |                |              |             | 3'-5'        |           | 32           | 348           |
| 168187709        | 2,13         | SPOCK3         | 3'-5'        | I 3         | 3'-5'        | no        | 21           | 400           |
| <b>173133742</b> | <b>1,97</b>  | <b>GALNT17</b> | <b>5'-3'</b> | <b>I 2</b>  | <b>3'-5'</b> | ok        | <b>22</b>    | <b>358</b>    |
| 173192103        | 1,695        | GALNT17        | 5'-3'        | I 2         | 3'-5'        | ok        | 53           | 353           |
| 175096427        | 1,965        |                |              |             | 3'-5'        |           | 21           | 367           |
| 175385713        | 2,465        |                |              |             | 3'-5'        |           | 43           | 411           |
| 178168703        | 1,7          |                |              |             | 3'-5'        |           | 49           | 314           |
| 178909073        | 1,475        | LOC285501      | 5'-3'        | I 2         | 3'-5'        | ok        | 18           | 299           |
| 179158911        | 2,505        |                |              |             | 3'-5'        |           | 37           | 355           |
| 180234033        | 1,645        |                |              |             | 3'-5'        |           | 43           | 575           |
| 181701669        | 2,18         |                |              |             | 3'-5'        |           | 26           | 360           |
| 181744517        | 2,425        |                |              |             | 3'-5'        |           | 29           | 439           |
| 182672158        | 2,395        |                |              |             | 3'-5'        |           | 43           | 393           |
| 184478228        | 2,225        | CLDN22         | 3'-5'        | E 1         | 3'-5'        | no        | 23           | 419           |
| 187211277        | 2,38         |                |              |             | 3'-5'        |           | 42           | 380           |
| 187460843        | 1,785        |                |              |             | 3'-5'        |           | 49           | 331           |
| <b>∅</b>         |              |                | <b>44</b>    |             |              | <b>91</b> | <b>35,34</b> | <b>409,03</b> |
|                  |              |                | <b>47</b>    |             |              | <b>39</b> | <b>34,91</b> | <b>407,07</b> |
|                  |              |                | <b>91</b>    |             |              | <b>52</b> | <b>35,52</b> | <b>409,91</b> |

|             |                 |              |              |              |               |              |    |           |            |
|-------------|-----------------|--------------|--------------|--------------|---------------|--------------|----|-----------|------------|
| <b>5</b>    | 1645715         | 1,625        |              |              | <b>I</b>      | 5'-3'        | 47 | 279       |            |
|             | 4101847         | 2,045        |              |              |               | 5'-3'        | 19 | 415       |            |
| 242 results | 10315899        | 1,535        | CCT5         | 5'-3'        | I 9 E 10 I 10 | 5'-3'        | no | 50        | 291        |
|             | 12844111        | 2,03         |              |              |               | 5'-3'        | 40 | 528       |            |
|             | 15777853        | 2,535        | FBXL7        | 5'-3'        | I 2           | 5'-3'        | no | 41        | 401        |
|             | 18759882        | 2,75         |              |              |               | 5'-3'        | 36 | 394       |            |
|             | <b>22420974</b> | <b>2,525</b> | <b>CDH12</b> | <b>3'-5'</b> | <b>I 3</b>    | <b>5'-3'</b> | ok | <b>29</b> | <b>419</b> |
|             | 25779127        | 2,26         |              |              |               | 5'-3'        | 40 | 482       |            |

|                 |             |              |              |              |              |           |           |            |
|-----------------|-------------|--------------|--------------|--------------|--------------|-----------|-----------|------------|
| 26358242        | 2,645       |              |              |              | 5'-3'        |           | 33        | 383        |
| 28043454        | 2,445       |              |              |              | 5'-3'        |           | 32        | 353        |
| 28830695        | 2,025       |              |              |              | 5'-3'        |           | 30        | 529        |
| 29599262        | 1,905       |              |              |              | 5'-3'        |           | 47        | 335        |
| 34541321        | 1,68        |              |              |              | 5'-3'        |           | 20        | 320        |
| 36376341        | 1,31        |              |              |              | 5'-3'        |           | 16        | 286        |
| 37617612        | 1,89        | WDR70        | 5'-3'        | 19           | 5'-3'        | no        | 16        | 402        |
| 38123185        | 2,03        |              |              |              | 5'-3'        |           | 24        | 468        |
| 39725895        | 2,375       |              |              |              | 5'-3'        |           | 27        | 429        |
| 41513066        | 2,1         | PLCXD3       | 3'-5'        | 11           | 5'-3'        | ok        | 42        | 324        |
| 41887281        | 2,44        | OXCT1        | 3'-5'        | 14           | 5'-3'        | ok        | 30        | 372        |
| 42915869        | 2,15        |              |              |              | 5'-3'        |           | 36        | 544        |
| 43128658        | 1,43        |              |              |              | 5'-3'        |           | 19        | 538        |
| 44059993        | 2,715       |              |              |              | 5'-3'        |           | 36        | 387        |
| 44955862        | 1,795       |              |              |              | 5'-3'        |           | 17        | 373        |
| 45362186        | 1,96        | HCN1         | 3'-5'        | 15           | 5'-3'        | ok        | 18        | 396        |
| 49673498        | 2,12        |              |              |              | 5'-3'        |           | 20        | 408        |
| 51049413        | 2,485       |              |              |              | 5'-3'        |           | 38        | 361        |
| 51346918        | 2,205       |              |              |              | 5'-3'        |           | 26        | 365        |
| 53475039        | 2,755       | ARL15        | 3'-5'        | 13           | 5'-3'        | ok        | 34        | 423        |
| 54277189        | 2,29        |              |              |              | 5'-3'        |           | 45        | 426        |
| 57171257        | 2,71        |              |              |              | 5'-3'        |           | 37        | 422        |
| 59048382        | 2,565       | PDE4D        | 3'-5'        | 11           | 5'-3'        | ok        | 32        | 377        |
| 59895892        | 2,17        |              |              |              | 5'-3'        |           | 25        | 450        |
| 60707430        | 2,155       |              |              |              | 5'-3'        |           | 23        | 433        |
| 61310319        | 1,845       |              |              |              | 5'-3'        |           | 26        | 525        |
| 64275513        | 2,285       | SDCCAG10     | 5'-3'        | 11           | 5'-3'        | no        | 43        | 447        |
| 64529514        | 1,98        | ADAMTS6      | 3'-5'        | 20           | 5'-3'        | ok        | 19        | 390        |
| 71621888        | 2,485       | MRPS27       | 3'-5'        | 14           | 5'-3'        | ok        | 40        | 437        |
| 72337296        | 2,435       | FCHO2        | 5'-3'        | 15           | 5'-3'        | no        | 39        | 361        |
| 72743806        | 2,67        |              |              |              | 5'-3'        |           | 39        | 410        |
| 74578470        | 1,825       |              |              |              | 5'-3'        |           | 19        | 359        |
| 75086217        | 2,82        |              |              |              | 5'-3'        |           | 36        | 408        |
| 75666379        | 2,37        |              |              |              | 5'-3'        |           | 33        | 490        |
| <b>76210266</b> | <b>2,01</b> | <b>S100Z</b> | <b>5'-3'</b> | <b>14</b>    | <b>5'-3'</b> | <b>no</b> | <b>19</b> | <b>422</b> |
| 76795204        | 2,695       | WDR41        | 3'-5'        | 13           | 5'-3'        | ok        | 33        | 425        |
| 79806054        | 2,175       | ZFYVE16      | 5'-3'        | 16 E 17   17 | 5'-3'        | no        | 21        | 409        |
| 81516197        | 2,535       | ATG10        | 5'-3'        | 15           | 5'-3'        | no        | 32        | 447        |
| 82077124        | 2,195       |              |              |              | 5'-3'        |           | 25        | 373        |
| 82527623        | 2,865       | XRCC4        | 5'-3'        | 14           | 5'-3'        | no        | 35        | 407        |

|                  |             |                |              |                       |              |           |           |            |
|------------------|-------------|----------------|--------------|-----------------------|--------------|-----------|-----------|------------|
| 85198999         | 2,37        |                |              |                       | 5'-3'        |           | 41        | 450        |
| 87847657         | 2,385       |                |              |                       | 5'-3'        |           | 43        | 427        |
| 91347413         | 2,7         |                |              |                       | 5'-3'        |           | 33        | 394        |
| 91511314         | 1,855       |                |              |                       | 5'-3'        |           | 21        | 345        |
| 92005978         | 2,065       |                |              |                       | 5'-3'        |           | 21        | 387        |
| 92349356         | 1,715       |                |              |                       | 5'-3'        |           | 47        | 521        |
| 93372133         | 2,155       | C5orf21        | 3'-5'        | I 3                   | 5'-3'        | ok        | 40        | 315        |
| 93577607         | 1,64        |                |              |                       | 5'-3'        |           | 19        | 496        |
| 94238906         | 2,745       | MCTP1          | 3'-5'        | I 12                  | 5'-3'        | ok        | 34        | 425        |
| 95480377         | 2,64        |                |              |                       | 5'-3'        |           | 35        | 362        |
| 96956236         | 2,47        |                |              |                       | 5'-3'        |           | 27        | 408        |
| 98810007         | 2,27        |                |              |                       | 5'-3'        |           | 46        | 398        |
| 99171219         | 2,12        |                |              |                       | 5'-3'        |           | 49        | 398        |
| 100152507        | 2,11        |                |              |                       | 5'-3'        |           | 47        | 442        |
| 100741107        | 1,92        |                |              |                       | 5'-3'        |           | 20        | 368        |
| 101569365        | 2,685       |                |              |                       | 5'-3'        |           | 33        | 427        |
| 105031941        | 2,67        |                |              |                       | 5'-3'        |           | 38        | 398        |
| 105059712        | 2,71        |                |              |                       | 5'-3'        |           | 37        | 422        |
| 105579844        | 2,11        |                |              |                       | 5'-3'        |           | 30        | 512        |
| 109170035        | 2,53        | MAN2A1         | 5'-3'        | I 12                  | 5'-3'        | no        | 40        | 390        |
| 112035420        | 2,685       |                |              |                       | 5'-3'        |           | 38        | 401        |
| 112590506        | 2,18        | MCC            | 3'-5'        | I 1                   | 5'-3'        | ok        | 41        | 488        |
| 113306812        | 1,505       |                |              |                       | 5'-3'        |           | 18        | 305        |
| 117140540        | 2,055       |                |              |                       | 5'-3'        |           | 27        | 325        |
| 117243150        | 1,895       |                |              |                       | 5'-3'        |           | 50        | 455        |
| 118209928        | 1,875       | DTWD2          | 3'-5'        | I 5                   | 5'-3'        | ok        | 25        | 509        |
| <b>118865620</b> | <b>2,81</b> | <b>HSD17B4</b> | <b>5'-3'</b> | <b>I 13 E 14 I 14</b> | <b>5'-3'</b> | <b>no</b> | <b>34</b> | <b>412</b> |
| 120758758        | 1,565       |                |              |                       | 5'-3'        |           | 17        | 491        |
| 126535602        | 1,925       |                |              |                       | 5'-3'        |           | 22        | 349        |
| 127439823        | 2,625       |                |              |                       | 5'-3'        |           | 36        | 369        |
| 129036324        | 2,19        | ADAMTS19       | 5'-3'        | I 16                  | 5'-3'        | no        | 25        | 372        |
| 130239608        | 1,575       |                |              |                       | 5'-3'        |           | 25        | 249        |
| 137342010        | 1,85        | C5orf5         | 3'-5'        | I 10                  | 5'-3'        | ok        | 20        | 464        |
| 137511093        | 2,675       | BRD8           | 3'-5'        | I 23                  | 5'-3'        | ok        | 34        | 439        |
| 137677115        | 2,3         | CDC25C         | 3'-5'        | I 7                   | 5'-3'        | ok        | 25        | 424        |
| 139580216        | 2,365       | C5orf32        | 5'-3'        | I 2                   | 5'-3'        | no        | 40        | 357        |
| 141724326        | 2,075       |                |              |                       | 5'-3'        |           | 51        | 409        |
| 143200238        | 2,24        |                |              |                       | 5'-3'        |           | 29        | 342        |
| 143476537        | 1,965       |                |              |                       | 5'-3'        |           | 19        | 431        |
| 144044430        | 2,225       |                |              |                       | 5'-3'        |           | 34        | 529        |

|           |       |         |       |           |       |    |    |     |
|-----------|-------|---------|-------|-----------|-------|----|----|-----|
| 145191812 | 1,55  | PRELID2 | 3'-5' | 1 1       | 5'-3' | ok | 20 | 294 |
| 149666962 | 1,965 |         |       |           | 5'-3' |    | 30 | 277 |
| 153490073 | 2,38  |         |       |           | 5'-3' |    | 27 | 390 |
| 154507617 | 1,88  |         |       |           | 5'-3' |    | 19 | 448 |
| 154709669 | 2,025 |         |       |           | 5'-3' |    | 21 | 439 |
| 155530035 | 2,23  |         |       |           | 5'-3' |    | 23 | 400 |
| 157003346 | 2,545 | SOX30   | 3'-5' | 1 3       | 5'-3' | ok | 41 | 403 |
| 157892778 | 2,19  |         |       |           | 5'-3' |    | 30 | 496 |
| 158475115 | 2,265 |         |       |           | 5'-3' |    | 38 | 501 |
| 158708045 | 2,77  |         |       |           | 5'-3' |    | 37 | 408 |
| 158962501 | 1,785 |         |       |           | 5'-3' |    | 23 | 507 |
| 161163501 | 2,19  |         |       |           | 5'-3' |    | 28 | 342 |
| 162269489 | 2,755 |         |       |           | 5'-3' |    | 36 | 423 |
| 163987630 | 2,39  |         |       |           | 5'-3' |    | 31 | 352 |
| 164921728 | 2,66  |         |       |           | 5'-3' |    | 37 | 432 |
| 165480978 | 2,645 |         |       |           | 5'-3' |    | 34 | 445 |
| 170650314 | 2,33  | RANBP17 | 5'-3' | 1 25      | 5'-3' | no | 31 | 478 |
| 172879488 | 1,97  |         |       |           | 5'-3' |    | 49 | 450 |
| 174867657 | 2,04  | SFXN1   | 5'-3' | 1 2       | 5'-3' | no | 50 | 392 |
| 179588779 | 1,43  |         |       |           | 5'-3' |    | 46 | 588 |
| 289604    | 1,635 | SDHA    | 5'-3' | E 10   10 | 3'-5' | ok | 47 | 281 |
| 2319917   | 1,935 |         |       |           | 3'-5' |    | 19 | 437 |
| 4637519   | 1,84  |         |       |           | 3'-5' |    | 24 | 312 |
| 8306521   | 2,56  |         |       |           | 3'-5' |    | 41 | 412 |
| 9910788   | 2,245 |         |       |           | 3'-5' |    | 34 | 525 |
| 10804588  | 2,065 | DAP     | 3'-5' | 1 1       | 3'-5' | no | 19 | 407 |
| 10890811  | 2,11  |         |       |           | 3'-5' |    | 28 | 326 |
| 12691502  | 1,685 |         |       |           | 3'-5' |    | 41 | 231 |
| 13819968  | 2,79  | DNAH5   | 3'-5' | 1 58      | 3'-5' | no | 36 | 416 |
| 14146729  | 2,02  |         |       |           | 3'-5' |    | 28 | 308 |
| 15699292  | 1,775 | FBXL7   | 5'-3' | 1 2       | 3'-5' | ok | 23 | 309 |
| 15902687  | 2,465 | FBXL7   | 5'-3' | 1 2       | 3'-5' | ok | 30 | 377 |
| 16157388  | 1,92  | MARCH11 | 3'-5' | 1 7       | 3'-5' | no | 19 | 378 |
| 17933613  | 2,015 |         |       |           | 3'-5' |    | 19 | 397 |
| 19016019  | 2,13  |         |       |           | 3'-5' |    | 41 | 498 |
| 22566600  | 2,5   | CDH12   | 3'-5' | 1 1       | 3'-5' | no | 30 | 384 |
| 22754624  | 2,86  | CDH12   | 3'-5' | 1 1       | 3'-5' | no | 35 | 406 |
| 23390106  | 2,505 |         |       |           | 3'-5' |    | 28 | 413 |
| 25048485  | 2,79  |         |       |           | 3'-5' |    | 34 | 402 |
| 26384154  | 2,54  |         |       |           | 3'-5' |    | 30 | 392 |

|                 |              |              |              |             |              |    |           |            |
|-----------------|--------------|--------------|--------------|-------------|--------------|----|-----------|------------|
| 27178387        | 2,615        |              |              |             | 3'-5'        |    | 32        | 431        |
| 28145494        | 2,095        |              |              |             | 3'-5'        |    | 44        | 475        |
| 28393679        | 2,275        |              |              |             | 3'-5'        |    | 44        | 379        |
| 29039183        | 2,66         |              |              |             | 3'-5'        |    | 31        | 406        |
| 29353554        | 2,57         |              |              |             | 3'-5'        |    | 30        | 420        |
| 30083501        | 1,95         |              |              |             | 3'-5'        |    | 21        | 454        |
| 34690496        | 2,765        |              |              |             | 3'-5'        |    | 37        | 411        |
| 34941122        | 1,92         | RAD1         | 3'-5'        | E 6         | 3'-5'        | no | 16        | 408        |
| 36234489        | 2,165        | C5orf33      | 3'-5'        | I 10        | 3'-5'        | no | 44        | 461        |
| 39033317        | 2,075        | RICTOR       | 3'-5'        | I 5         | 3'-5'        | no | 51        | 409        |
| 41287310        | 2,1          | C6           | 3'-5'        | I 1         | 3'-5'        | no | 50        | 414        |
| 52418009        | 2,53         | ITGA2        | 5'-3'        | I 27 E 28   | 3'-5'        | ok | 32        | 448        |
| 52999060        | 2,08         | NDUFS4       | 5'-3'        | I 4         | 3'-5'        | ok | 49        | 390        |
| 53984200        | 2,685        |              |              |             | 3'-5'        |    | 32        | 401        |
| <b>58550622</b> | <b>2,665</b> | <b>PDE4D</b> | <b>3'-5'</b> | <b>I 1</b>  | <b>3'-5'</b> | no | <b>37</b> | <b>431</b> |
| 58674799        | 2,06         | PDE4D        | 3'-5'        | I 1         | 3'-5'        | no | 46        | 356        |
| 59800654        | 1,725        |              |              |             | 3'-5'        |    | 31        | 599        |
| 60301423        | 2,565        | NDUFA12L     | 5'-3'        | I 1         | 3'-5'        | ok | 31        | 431        |
| 61066566        | 2,165        |              |              |             | 3'-5'        |    | 45        | 367        |
| 62525090        | 1,305        |              |              |             | 3'-5'        |    | 19        | 255        |
| <b>64913045</b> | <b>2,07</b>  | <b>PPWD1</b> | <b>5'-3'</b> | <b>I 7</b>  | <b>3'-5'</b> | ok | <b>51</b> | <b>408</b> |
| 66651329        | 1,755        |              |              |             | 3'-5'        |    | 48        | 503        |
| 68237131        | 2,105        |              |              |             | 3'-5'        |    | 41        | 315        |
| 68322535        | 1,86         |              |              |             | 3'-5'        |    | 48        | 482        |
| 69365916        | 1,655        | 3ERF1A/SMAI  | 5'-3'        | I 2/I 10    | 3'-5'        | ok | 42        | 583        |
| 70241335        | 1,655        | 3ERF1A/SMAI  | 5'-3'        | I 2/I 10    | 3'-5'        | ok | 42        | 583        |
| 70797623        | 2,81         | BDP1         | 5'-3'        | I 4 E 5 I 5 | 3'-5'        | ok | 36        | 412        |
| 71453077        | 2,015        | MAP1B        | 5'-3'        | I 2         | 3'-5'        | ok | 52        | 411        |
| 71500000        | 2,045        | MAP1B        | 5'-3'        | I 2         | 3'-5'        | ok | 50        | 425        |
| 71739982        | 2,665        |              |              |             | 3'-5'        |    | 36        | 441        |
| 74679547        | 2,235        | HMGCR        | 5'-3'        | I 6         | 3'-5'        | ok | 26        | 371        |
| 78527692        | 2,865        |              |              |             | 3'-5'        |    | 35        | 407        |
| 82965744        | 2,03         |              |              |             | 3'-5'        |    | 19        | 418        |
| 84987389        | 1,61         |              |              |             | 3'-5'        |    | 27        | 236        |
| 85866772        | 2,465        |              |              |             | 3'-5'        |    | 40        | 441        |
| 86672056        | 2,2          | RASA1        | 5'-3'        | I 5         | 3'-5'        | ok | 43        | 464        |
| 86798893        | 1,365        |              |              |             | 3'-5'        |    | 46        | 217        |
| 87222673        | 2,375        |              |              |             | 3'-5'        |    | 30        | 359        |
| 89162283        | 2,4          |              |              |             | 3'-5'        |    | 26        | 414        |
| 92477243        | 2,51         |              |              |             | 3'-5'        |    | 34        | 472        |

|                  |             |                |              |                |              |           |           |            |
|------------------|-------------|----------------|--------------|----------------|--------------|-----------|-----------|------------|
| 92637342         | 2,74        |                |              |                | 3'-5'        |           | 35        | 382        |
| 93660450         | 1,88        |                |              |                | 3'-5'        |           | 28        | 538        |
| 97227470         | 2,65        |                |              |                | 3'-5'        |           | 39        | 404        |
| 99213769         | 1,675       |                |              |                | 3'-5'        |           | 49        | 509        |
| 99248098         | 2,335       |                |              |                | 3'-5'        |           | 44        | 391        |
| 99299380         | 2,455       |                |              |                | 3'-5'        |           | 41        | 433        |
| 100418505        | 2,87        |                |              |                | 3'-5'        |           | 35        | 410        |
| 101905537        | 2,39        |                |              |                | 3'-5'        |           | 40        | 362        |
| 101982417        | 2,045       |                |              |                | 3'-5'        |           | 27        | 495        |
| 103157019        | 2,43        |                |              |                | 3'-5'        |           | 42        | 428        |
| 105515695        | 2,435       |                |              |                | 3'-5'        |           | 31        | 457        |
| 105946076        | 1,78        |                |              |                | 3'-5'        |           | 16        | 438        |
| 107356295        | 2,095       | FBXL17         | 3'-5'        | 1 8            | 3'-5'        | no        | 35        | 565        |
| 109137946        | 2,025       | MAN2A1         | 5'-3'        | 1 7 E 8        | 3'-5'        | ok        | 23        | 359        |
| 114982176        | 2,29        | ICAM2/TMED     | 3'-5'        | 1 2/1 2        | 3'-5'        | no        | 31        | 332        |
| 115264978        | 1,925       | AP3S1          | 5'-3'        | 1 5            | 3'-5'        | ok        | 49        | 459        |
| <b>115536097</b> | <b>2,36</b> | <b>COMMD10</b> | <b>5'-3'</b> | <b>1 5</b>     | <b>3'-5'</b> | <b>ok</b> | <b>31</b> | <b>346</b> |
| 115684677        | 2,585       |                |              |                | 3'-5'        |           | 34        | 361        |
| 116594238        | 2,17        |                |              |                | 3'-5'        |           | 22        | 398        |
| 117148938        | 2,61        |                |              |                | 3'-5'        |           | 36        | 366        |
| 117713880        | 1,425       |                |              |                | 3'-5'        |           | 17        | 299        |
| 118419198        | 2,315       |                |              |                | 3'-5'        |           | 33        | 501        |
| 118893011        | 2,395       | HSD17B4        | 5'-3'        | 1 20 E 21 1 21 | 3'-5'        | ok        | 40        | 455        |
| 119421893        | 2,155       |                |              |                | 3'-5'        |           | 45        | 365        |
| 120157455        | 2,225       |                |              |                | 3'-5'        |           | 23        | 399        |
| 120407336        | 2,33        |                |              |                | 3'-5'        |           | 44        | 428        |
| 122212358        | 2,21        | SNX24          | 5'-3'        | 1 1            | 3'-5'        | ok        | 28        | 472        |
| 122726604        | 1,95        | CCDC100        | 3'-5'        | 1 11           | 3'-5'        | no        | 52        | 424        |
| 123105707        | 1,62        |                |              |                | 3'-5'        |           | 41        | 218        |
| 124889200        | 2,18        |                |              |                | 3'-5'        |           | 48        | 400        |
| 127486996        | 1,105       | SLC12A2        | 5'-3'        | 1 4            | 3'-5'        | ok        | 54        | 245        |
| 127828697        | 2,295       | FBN2           | 3'-5'        | 1 5            | 3'-5'        | no        | 43        | 445        |
| 128060236        | 2,09        |                |              |                | 3'-5'        |           | 22        | 382        |
| 128831676        | 2,085       | ADAMTS19       | 5'-3'        | 1 2            | 3'-5'        | ok        | 22        | 381        |
| 128858497        | 1,57        | ADAMTS19       | 5'-3'        | 1 2            | 3'-5'        | ok        | 52        | 318        |
| 135753737        | 2,8         |                |              |                | 3'-5'        |           | 34        | 404        |
| 135796999        | 2,26        |                |              |                | 3'-5'        |           | 46        | 396        |
| 136597569        | 1,685       | SPOCK1         | 3'-5'        | 1 3            | 3'-5'        | no        | 52        | 477        |
| 137786846        | 1,74        | JMJD1B         | 5'-3'        | 1 15           | 3'-5'        | ok        | 16        | 446        |
| 138945977        | 1,985       | UBE2D2         | 5'-3'        | 1 1            | 3'-5'        | ok        | 23        | 351        |

|                  |              |               |              |             |              |           |              |               |
|------------------|--------------|---------------|--------------|-------------|--------------|-----------|--------------|---------------|
| 140417722        | 1,885        |               |              |             | 3'-5'        |           | 50           | 457           |
| 143170106        | 1,315        |               |              |             | 3'-5'        |           | 50           | 571           |
| 143775455        | 2,54         | KCTD16        | 5'-3'        | 1 3         | 3'-5'        | ok        | 30           | 392           |
| 144208677        | 1,945        |               |              |             | 3'-5'        |           | 49           | 455           |
| <b>146678649</b> | <b>2,365</b> | <b>STK32A</b> | <b>5'-3'</b> | <b>1 4</b>  | <b>3'-5'</b> | ok        | <b>43</b>    | <b>387</b>    |
| 146778114        | 2,42         | DPYSL3        | 3'-5'        | 1 3 E 3 1 2 | 3'-5'        | no        | 35           | 318           |
| 146971037        | 1,73         | JAKMIP2       | 3'-5'        | 1 20        | 3'-5'        | no        | 24           | 528           |
| 147509275        | 2,295        |               |              |             | 3'-5'        |           | 31           | 485           |
| 148676374        | 2,55         | AFAP1L1       | 5'-3'        | 1 11        | 3'-5'        | ok        | 41           | 414           |
| 150945093        | 2,045        |               |              |             | 3'-5'        |           | 26           | 333           |
| 150996758        | 2,38         |               |              |             | 3'-5'        |           | 27           | 390           |
| 151318313        | 1,965        |               |              |             | 3'-5'        |           | 29           | 531           |
| 151588884        | 1,825        |               |              |             | 3'-5'        |           | 26           | 289           |
| <b>152885578</b> | <b>2,695</b> | <b>GRIA1</b>  | <b>5'-3'</b> | <b>1 2</b>  | <b>3'-5'</b> | ok        | <b>37</b>    | <b>393</b>    |
| 153424812        | 2,25         |               |              |             | 3'-5'        |           | 28           | 464           |
| 154540788        | 2,325        |               |              |             | 3'-5'        |           | 24           | 409           |
| 154556548        | 1,905        |               |              |             | 3'-5'        |           | 43           | 523           |
| 154798757        | 1,9          |               |              |             | 3'-5'        |           | 48           | 344           |
| 156310120        | 2,275        | TIMD4         | 3'-5'        | 1 3         | 3'-5'        | no        | 25           | 429           |
| 157699953        | 2,365        |               |              |             | 3'-5'        |           | 29           | 451           |
| 159227522        | 2,035        |               |              |             | 3'-5'        |           | 49           | 437           |
| 160537843        | 2,225        |               |              |             | 3'-5'        |           | 29           | 339           |
| 163586255        | 2,495        |               |              |             | 3'-5'        |           | 35           | 485           |
| 163837950        | 2,07         |               |              |             | 3'-5'        |           | 19           | 410           |
| 166791345        | 2,225        |               |              |             | 3'-5'        |           | 41           | 339           |
| 167067323        | 2,445        | ODZ2          | 5'-3'        | 1 1         | 3'-5'        | ok        | 27           | 403           |
| 168668384        | 2,225        |               |              |             | 3'-5'        |           | 39           | 499           |
| 169163884        | 1,96         | DOCK2         | 5'-3'        | 1 26        | 3'-5'        | ok        | 43           | 512           |
| 170522316        | 1,765        | RANBP17       | 5'-3'        | 1 14        | 3'-5'        | ok        | 31           | 591           |
| 173303272        | 2,525        | CPEB4         | 5'-3'        | 1 4         | 3'-5'        | ok        | 31           | 439           |
| 174145931        | 2,355        |               |              |             | 3'-5'        |           | 30           | 463           |
| 175687329        | 2,84         | C5orf25       | 3'-5'        | 1 9         | 3'-5'        | no        | 35           | 402           |
| 175854470        | 2,02         | UBXD8         | 5'-3'        | 1 7         | 3'-5'        | ok        | 44           | 328           |
| 179305143        | 1,88         |               |              |             | 3'-5'        |           | 32           | 240           |
|                  |              |               | <b>48</b>    |             |              | <b>86</b> | <b>33,67</b> | <b>411,16</b> |
|                  |              |               | <b>38</b>    |             |              | <b>35</b> | <b>34,97</b> | <b>410,3</b>  |
|                  |              |               | <b>86</b>    |             |              | <b>57</b> | <b>32,96</b> | <b>411,63</b> |

Ø

|                  |                |              |                   |              |     |            |              |     |           |            |
|------------------|----------------|--------------|-------------------|--------------|-----|------------|--------------|-----|-----------|------------|
| 6<br>275 results | 3516199        | 2,405        |                   |              | 1   | 5'-3'      |              | 30  | 365       |            |
|                  | 4290427        | 1,6          |                   |              |     | 5'-3'      |              | 49  | 294       |            |
|                  | 6443618        | 1,69         |                   |              |     | 5'-3'      |              | 45  | 546       |            |
|                  | 6899507        | 1,91         |                   |              |     | 5'-3'      |              | 37  | 236       |            |
|                  | <b>7961135</b> | <b>2,745</b> | <b>XNDC5/MUTE</b> | <b>3'-5'</b> |     | <b>14</b>  | <b>5'-3'</b> | ok  | <b>34</b> | <b>425</b> |
|                  | 8488497        | 2,445        |                   |              |     |            | 5'-3'        | 41  | 435       |            |
|                  | 9871354        | 2,22         |                   |              |     |            | 5'-3'        | 45  | 378       |            |
|                  | 10866240       | 1,405        |                   |              |     |            | 5'-3'        | 21  | 255       |            |
|                  | 11530992       | 2,05         |                   |              |     |            | 5'-3'        | 49  | 384       |            |
|                  | 12443245       | 1,955        |                   |              |     |            | 5'-3'        | 47  | 473       |            |
|                  | 13005737       | 2,67         | PHACTR1           | 5'-3'        |     | 13         | 5'-3'        | no  | 36        | 440        |
|                  | 13846016       | 2,53         |                   |              |     |            | 5'-3'        | 37  | 458       |            |
|                  | 14078329       | 1,855        | RNF182            | 5'-3'        |     | 11         | 5'-3'        | no  | 51        | 453        |
|                  | 17615207       | 2,375        | CAP2              | 5'-3'        |     | 14 E 5   5 | 5'-3'        | no  | 33        | 489        |
|                  | 17851579       | 2,53         |                   |              |     |            | 5'-3'        | 33  | 458       |            |
|                  | 20371415       | 1,95         |                   |              |     |            | 5'-3'        | 25  | 494       |            |
|                  | 21002431       | 2,53         | CDKAL1            | 5'-3'        |     | 19         | 5'-3'        | no  | 34        | 468        |
|                  | 22822129       | 2,375        |                   |              |     |            | 5'-3'        | 44  | 419       |            |
|                  | 23810801       | 2,21         |                   |              |     |            | 5'-3'        | 23  | 396       |            |
|                  | 24112716       | 1,82         |                   |              |     |            | 5'-3'        | 24  | 510       |            |
|                  | 24264501       | 2,165        |                   |              |     |            | 5'-3'        | 21  | 411       |            |
|                  | 27471958       | 2,115        | ZNF391            | 5'-3'        |     | 11         | 5'-3'        | no  | 34        | 551        |
|                  | 28934599       | 2,295        |                   |              |     |            | 5'-3'        | 40  | 343       |            |
|                  | 29559250       | 2,705        |                   |              |     |            | 5'-3'        | 35  | 375       |            |
|                  | 30262502       | 1,935        | TRIM26            | 3'-5'        |     | 19         | 5'-3'        | ok  | 21        | 457        |
|                  | 32444115       | 2,51         | C6orf10           | 3'-5'        |     | 13 E 3   2 | 5'-3'        | ok  | 30        | 386        |
|                  | 41889540       | 2,595        | USP49             | 3'-5'        |     | 13         | 5'-3'        | ok  | 40        | 415        |
|                  | 42301069       | 2,43         |                   |              |     |            | 5'-3'        | 41  | 380       |            |
|                  | 43680298       | 2,565        | POLH              | 5'-3'        |     | 17 E 8   8 | 5'-3'        | no  | 29        | 411        |
|                  | 45863999       | 2,265        |                   |              |     |            | 5'-3'        | 31  | 327       |            |
| 46000392         | 1,935          | CLIC5        | 3'-5'             |              | 14  | 5'-3'      | ok           | 26  | 507       |            |
| 47667669         | 2,405          | CD2AP        | 5'-3'             |              | 111 | 5'-3'      | no           | 30  | 453       |            |
| 47934059         | 1,37           |              |                   |              |     | 5'-3'      | 23           | 590 |           |            |
| 48686427         | 2,165          |              |                   |              |     | 5'-3'      | 34           | 277 |           |            |
| 49048670         | 2,59           |              |                   |              |     | 5'-3'      | 34           | 362 |           |            |
| 49239429         | 2,655          |              |                   |              |     | 5'-3'      | 36           | 375 |           |            |
| 49711312         | 2,11           | RHAG         | 3'-5'             |              | 11  | 5'-3'      | ok           | 21  | 422       |            |
| 50132555         | 1,82           |              |                   |              |     | 5'-3'      | 19           | 358 |           |            |
| 50492845         | 2,2            |              |                   |              |     | 5'-3'      | 44           | 364 |           |            |



|           |       |          |       |               |       |    |    |     |
|-----------|-------|----------|-------|---------------|-------|----|----|-----|
| 50610804  | 1,76  |          |       |               | 5'-3' |    | 47 | 512 |
| 52144594  | 2,395 |          |       |               | 5'-3' |    | 38 | 343 |
| 53659824  | 2,035 |          |       |               | 5'-3' |    | 22 | 447 |
| 53855408  | 2,72  | LRRC1    | 5'-3' | 1 4 E 5   5   | 5'-3' | no | 34 | 388 |
| 55140087  | 1,9   |          |       |               | 5'-3' |    | 20 | 454 |
| 56381105  | 2,715 |          |       |               | 5'-3' |    | 37 | 397 |
| 63337063  | 2,365 |          |       |               | 5'-3' |    | 43 | 431 |
| 63817340  | 1,875 |          |       |               | 5'-3' |    | 46 | 319 |
| 65887495  | 2,575 |          |       |               | 5'-3' |    | 35 | 469 |
| 68306612  | 2,855 |          |       |               | 5'-3' |    | 35 | 413 |
| 71727797  | 2,23  |          |       |               | 5'-3' |    | 47 | 418 |
| 73362789  | 2,19  |          |       |               | 5'-3' |    | 23 | 392 |
| 78379120  | 2,045 |          |       |               | 5'-3' |    | 50 | 425 |
| 79651274  | 2,245 | IRAK1BP1 | 5'-3' | 1   1 E 2   2 | 5'-3' | no | 23 | 415 |
| 79872093  | 2,34  |          |       |               | 5'-3' |    | 45 | 402 |
| 81491501  | 2,23  |          |       |               | 5'-3' |    | 43 | 458 |
| 85100055  | 2,635 |          |       |               | 5'-3' |    | 32 | 427 |
| 86113795  | 1,86  |          |       |               | 5'-3' |    | 50 | 356 |
| 86546973  | 1,36  |          |       |               | 5'-3' |    | 20 | 562 |
| 87196126  | 2,165 |          |       |               | 5'-3' |    | 26 | 461 |
| 87619027  | 2,235 |          |       |               | 5'-3' |    | 45 | 381 |
| 87985786  | 1,93  | ZNF292   | 5'-3' | 1 4           | 5'-3' | no | 50 | 370 |
| 88403392  | 2,45  | ORC3L    | 5'-3' | 1   13        | 5'-3' | no | 32 | 464 |
| 88992913  | 2,595 |          |       |               | 5'-3' |    | 32 | 383 |
| 91197503  | 2,345 |          |       |               | 5'-3' |    | 45 | 403 |
| 93151898  | 1,645 |          |       |               | 5'-3' |    | 29 | 223 |
| 94638265  | 2,505 |          |       |               | 5'-3' |    | 31 | 443 |
| 94809603  | 2,015 |          |       |               | 5'-3' |    | 45 | 337 |
| 96756054  | 2,21  | FUT9     | 5'-3' | 1 2           | 5'-3' | no | 43 | 462 |
| 97434990  | 1,65  |          |       |               | 5'-3' |    | 20 | 504 |
| 98021948  | 2,235 |          |       |               | 5'-3' |    | 46 | 427 |
| 99339188  | 1,56  |          |       |               | 5'-3' |    | 44 | 236 |
| 102797228 | 2,59  |          |       |               | 5'-3' |    | 31 | 426 |
| 102896058 | 2,62  |          |       |               | 5'-3' |    | 30 | 408 |
| 105135364 | 2,305 |          |       |               | 5'-3' |    | 44 | 433 |
| 105561695 | 2,595 | LIN28B   | 5'-3' | 1 2           | 5'-3' | no | 30 | 403 |
| 105879470 | 1,745 | PREP     | 3'-5' | 1 9           | 5'-3' | ok | 31 | 223 |
| 108821614 | 2,385 | LACE1    | 5'-3' | 1 6           | 5'-3' | no | 41 | 371 |
| 111322569 | 2,295 | AMD1     | 5'-3' | E 6           | 5'-3' | no | 46 | 415 |
| 111955501 | 2,055 |          |       |               | 5'-3' |    | 46 | 355 |

|           |       |          |       |             |       |    |    |     |
|-----------|-------|----------|-------|-------------|-------|----|----|-----|
| 112265014 | 2,03  | FYN      | 3'-5' | 1 2         | 5'-3' | ok | 26 | 488 |
| 113752246 | 1,44  |          |       |             | 5'-3' |    | 16 | 312 |
| 115331210 | 2,05  |          |       |             | 5'-3' |    | 33 | 554 |
| 115768940 | 1,835 |          |       |             | 5'-3' |    | 43 | 281 |
| 116181788 | 1,375 |          |       |             | 5'-3' |    | 19 | 549 |
| 117522817 | 2,195 |          |       |             | 5'-3' |    | 38 | 303 |
| 119688036 | 1,57  | MAN1A1   | 3'-5' | 1 2         | 5'-3' | ok | 17 | 490 |
| 121218613 | 2,72  |          |       |             | 5'-3' |    | 33 | 398 |
| 121419935 | 1,28  |          |       |             | 5'-3' |    | 21 | 588 |
| 121601964 | 2,53  | C6orf170 | 3'-5' | E 20   19   | 5'-3' | ok | 39 | 438 |
| 125543297 | 2,28  | TPD52L1  | 5'-3' | 1 1         | 5'-3' | no | 27 | 448 |
| 127538963 | 2,32  | RSPO3    | 5'-3' | 1 4         | 5'-3' | no | 46 | 408 |
| 128472353 | 1,975 | PTPRK    | 3'-5' | 1 7         | 5'-3' | ok | 20 | 379 |
| 128684983 | 2,7   | PTPRK    | 3'-5' | E 3   2     | 5'-3' | ok | 38 | 404 |
| 130261850 | 2,52  |          |       |             | 5'-3' |    | 29 | 398 |
| 130405283 | 2,47  | L3MBTL3  | 5'-3' | 1 2 E 3   3 | 5'-3' | no | 38 | 460 |
| 131517926 | 2,2   | AKAP7    | 5'-3' | 1 1         | 5'-3' | no | 48 | 414 |
| 132684998 | 1,905 | MOXD1    | 3'-5' | 1 8 E 8     | 5'-3' | ok | 46 | 325 |
| 133304602 | 1,73  |          |       |             | 5'-3' |    | 29 | 578 |
| 133520013 | 1,94  |          |       |             | 5'-3' |    | 44 | 312 |
| 133904810 | 2,5   |          |       |             | 5'-3' |    | 39 | 444 |
| 134122423 | 2,46  |          |       |             | 5'-3' |    | 27 | 406 |
| 135534970 | 2,52  |          |       |             | 5'-3' |    | 28 | 408 |
| 135672944 | 2,21  | AHI1     | 3'-5' | 1 25        | 5'-3' | ok | 42 | 346 |
| 140245822 | 2,535 |          |       |             | 5'-3' |    | 32 | 447 |
| 140746440 | 2,5   |          |       |             | 5'-3' |    | 33 | 354 |
| 140764369 | 2,055 |          |       |             | 5'-3' |    | 50 | 423 |
| 141525958 | 2,425 |          |       |             | 5'-3' |    | 28 | 389 |
| 142534465 | 2,31  | VTA1     | 5'-3' | 1 4         | 5'-3' | no | 43 | 376 |
| 143325623 | 1,955 |          |       |             | 5'-3' |    | 17 | 405 |
| 144314785 | 1,785 | PLAGL1   | 3'-5' | 1 4         | 5'-3' | ok | 50 | 477 |
| 145792047 | 2,62  |          |       |             | 5'-3' |    | 31 | 420 |
| 146292711 | 2,485 | SHPRH    | 3'-5' | 1 14        | 5'-3' | ok | 28 | 417 |
| 150121656 | 2,335 | PCMT1    | 5'-3' | 1 1         | 5'-3' | no | 28 | 371 |
| 151873518 | 1,96  | C6orf97  | 5'-3' | 1 1         | 5'-3' | no | 21 | 366 |
| 153884724 | 2,21  |          |       |             | 5'-3' |    | 22 | 412 |
| 157388255 | 1,73  | ARID1B   | 5'-3' | 1 4         | 5'-3' | no | 17 | 360 |
| 157633045 | 2,14  |          |       |             | 5'-3' |    | 31 | 516 |
| 158481031 | 1,615 | SERAC1   | 3'-5' | 1 8 E 8     | 5'-3' | ok | 24 | 551 |
| 160434009 | 2,26  | IGF2R    | 5'-3' | 1 44        | 5'-3' | no | 29 | 346 |

|                 |              |               |              |            |              |    |           |            |
|-----------------|--------------|---------------|--------------|------------|--------------|----|-----------|------------|
| 160701814       | 1,65         | SLC22A3       | 5'-3'        | 1          | 5'-3'        | no | 23        | 534        |
| 160705012       | 2,51         | SLC22A3       | 5'-3'        | 1          | 5'-3'        | no | 33        | 356        |
| 164589149       | 1,415        |               |              |            | 5'-3'        |    | 51        | 541        |
| 165382446       | 2,675        |               |              |            | 5'-3'        |    | 34        | 439        |
| 165714543       | 1,91         | PDE10A        | 3'-5'        | 18         | 5'-3'        | ok | 16        | 406        |
| 166821263       | 1,81         | RPS6KA2       | 3'-5'        | 11/10      | 5'-3'        | ok | 22        | 326        |
| 167861898       | 2,55         |               |              |            | 5'-3'        |    | 39        | 384        |
| 169192879       | 2,71         |               |              |            | 5'-3'        |    | 38        | 406        |
| 169354309       | 2,255        |               |              |            | 5'-3'        |    | 40        | 335        |
| 452784          | 1,69         | EXOC2         | 3'-5'        | 23         | 3'-5'        | no | 18        | 476        |
| 4852416         | 2,27         | CDYL          | 5'-3'        | 4          | 3'-5'        | ok | 31        | 490        |
| 6352624         | 2,07         |               |              |            | 3'-5'        |    | 40        | 298        |
| 6471692         | 2,48         |               |              |            | 3'-5'        |    | 30        | 380        |
| 9886180         | 1,765        |               |              |            | 3'-5'        |    | 29        | 571        |
| 11790353        | 1,6          |               |              |            | 3'-5'        |    | 19        | 504        |
| <b>12144024</b> | <b>2,775</b> | <b>HIVEP1</b> | <b>5'-3'</b> | <b>  2</b> | <b>3'-5'</b> | ok | <b>37</b> | <b>409</b> |
| 13272825        | 1,965        | PHACTR1       | 5'-3'        | 5          | 3'-5'        | ok | 17        | 411        |
| 14492850        | 2,29         |               |              |            | 3'-5'        |    | 29        | 352        |
| 14800629        | 2,495        |               |              |            | 3'-5'        |    | 37        | 465        |
| 14801133        | 2,69         |               |              |            | 3'-5'        |    | 38        | 402        |
| 16817948        | 2,55         | ATXN1         | 3'-5'        | 3          | 3'-5'        | no | 29        | 404        |
| 19142576        | 1,95         |               |              |            | 3'-5'        |    | 18        | 424        |
| 20011068        | 2,26         |               |              |            | 3'-5'        |    | 23        | 412        |
| 25429119        | 2,195        | LRRC16A       | 5'-3'        | 2          | 3'-5'        | ok | 46        | 383        |
| 25447510        | 1,85         | LRRC16A       | 5'-3'        | 2          | 3'-5'        | ok | 49        | 344        |
| 29087841        | 1,07         |               |              |            | 3'-5'        |    | 16        | 580        |
| 29740127        | 2,57         | MOG           | 5'-3'        | 2          | 3'-5'        | ok | 36        | 460        |
| 32794658        | 1,855        |               |              |            | 3'-5'        |    | 48        | 483        |
| 33023367        | 1,555        |               |              |            | 3'-5'        |    | 45        | 573        |
| 34754412        | 2,515        | C6orf106      | 3'-5'        | 1          | 3'-5'        | no | 42        | 411        |
| 45020207        | 2,225        | SUPT3H        | 3'-5'        | 9          | 3'-5'        | no | 29        | 339        |
| 45591490        | 1,905        | RUNX2         | 5'-3'        | 7          | 3'-5'        | ok | 52        | 433        |
| 48000471        | 2,26         | 6orf138       | 3'-5'        | 2          | 3'-5'        | no | 25        | 432        |
| 48195426        | 1,95         |               |              |            | 3'-5'        |    | 23        | 474        |
| 54135522        | 1,985        | C6orf142      | 5'-3'        | 7          | 3'-5'        | ok | 20        | 437        |
| 54689640        | 1,615        |               |              |            | 3'-5'        |    | 18        | 327        |
| 56484095        | 1,645        | DST           | 3'-5'        | E 54   53  | 3'-5'        | no | 41        | 223        |
| 56823234        | 2,475        |               |              |            | 3'-5'        |    | 32        | 359        |
| 57278582        | 2,245        |               |              |            | 3'-5'        |    | 24        | 425        |
| 62116848        | 2,09         |               |              |            | 3'-5'        |    | 49        | 426        |

|                 |             |               |              |             |              |           |           |            |
|-----------------|-------------|---------------|--------------|-------------|--------------|-----------|-----------|------------|
| 62352906        | 2,645       |               |              |             | 3'-5'        |           | 32        | 425        |
| 63247875        | 2,255       |               |              |             | 3'-5'        |           | 24        | 395        |
| 63787184        | 2,285       |               |              |             | 3'-5'        |           | 27        | 447        |
| 64653312        | 2,135       |               |              |             | 3'-5'        |           | 35        | 261        |
| 65086093        | 2,27        |               |              |             | 3'-5'        |           | 40        | 338        |
| 65255024        | 1,945       |               |              |             | 3'-5'        |           | 52        | 425        |
| 65342932        | 2,235       |               |              |             | 3'-5'        |           | 25        | 437        |
| 65730551        | 2,475       |               |              |             | 3'-5'        |           | 43        | 409        |
| 66323063        | 2,745       | EGFL11        | 3'-5'        | I 1         | 3'-5'        | no        | 37        | 403        |
| 67264120        | 1,67        |               |              |             | 3'-5'        |           | 20        | 318        |
| 67562809        | 2,395       |               |              |             | 3'-5'        |           | 30        | 363        |
| 68176659        | 1,39        |               |              |             | 3'-5'        |           | 45        | 212        |
| 68239090        | 2,685       |               |              |             | 3'-5'        |           | 32        | 417        |
| 68665252        | 2,35        |               |              |             | 3'-5'        |           | 33        | 494        |
| 71037387        | 1,59        | COL9A1        | 3'-5'        | I 14        | 3'-5'        | no        | 52        | 322        |
| 72257677        | 2,115       |               |              |             | 3'-5'        |           | 43        | 337        |
| 72555524        | 1,97        |               |              |             | 3'-5'        |           | 53        | 408        |
| 72898362        | 1,41        | RIMS1         | 5'-3'        | I 4         | 3'-5'        | ok        | 21        | 256        |
| 73417831        | 2,515       | KCNQ5         | 5'-3'        | I 1         | 3'-5'        | ok        | 40        | 431        |
| 73684623        | 1,985       | KCNQ5         | 5'-3'        | I 1         | 3'-5'        | ok        | 22        | 361        |
| 74182926        | 1,795       | DDX43         | 5'-3'        | I 16        | 3'-5'        | ok        | 27        | 545        |
| 74493310        | 1,85        | CD109         | 5'-3'        | I 3         | 3'-5'        | ok        | 46        | 314        |
| 74553064        | 2,2         | CD109         | 5'-3'        | I 20 E 21   | 3'-5'        | ok        | 30        | 494        |
| 75153452        | 2,105       |               |              |             | 3'-5'        |           | 26        | 345        |
| 75531205        | 2,725       |               |              |             | 3'-5'        |           | 32        | 409        |
| 76101859        | 1,99        | FILIP1        | 3'-5'        | I 4         | 3'-5'        | no        | 48        | 456        |
| 76489227        | 2,145       |               |              |             | 3'-5'        |           | 28        | 333        |
| 77371852        | 2,28        |               |              |             | 3'-5'        |           | 25        | 428        |
| 77910239        | 1,54        |               |              |             | 3'-5'        |           | 54        | 332        |
| 78443791        | 1,805       |               |              |             | 3'-5'        |           | 33        | 215        |
| 78588206        | 2,795       |               |              |             | 3'-5'        |           | 34        | 403        |
| 81157482        | 2,46        |               |              |             | 3'-5'        |           | 34        | 336        |
| 81307077        | 1,97        |               |              |             | 3'-5'        |           | 34        | 580        |
| 83811951        | 2,415       | UBE2CBP       | 3'-5'        | I 3         | 3'-5'        | no        | 41        | 441        |
| <b>83887231</b> | <b>2,11</b> | <b>DOPEY1</b> | <b>5'-3'</b> | <b>I 10</b> | <b>3'-5'</b> | <b>ok</b> | <b>27</b> | <b>336</b> |
| <b>83887231</b> | <b>2,11</b> | <b>DOPEY1</b> |              | <b>I 10</b> | <b>3'-5'</b> |           | <b>27</b> | <b>336</b> |
| <b>83887231</b> | <b>2,11</b> | <b>DOPEY1</b> |              | <b>I 10</b> | <b>3'-5'</b> |           | <b>27</b> | <b>336</b> |
| 87011305        | 1,74        |               |              |             | 3'-5'        |           | 44        | 272        |
| 89115221        | 2,745       |               |              |             | 3'-5'        |           | 34        | 425        |
| 89307473        | 2,795       |               |              |             | 3'-5'        |           | 34        | 415        |

|                  |              |              |              |             |              |    |           |            |
|------------------|--------------|--------------|--------------|-------------|--------------|----|-----------|------------|
| 89321006         | 2,175        |              |              |             | 3'-5'        |    | 23        | 389        |
| <b>90417918</b>  | <b>2,105</b> | <b>MDN1</b>  | <b>3'-5'</b> | <b>I 95</b> | <b>3'-5'</b> | no | <b>24</b> | <b>453</b> |
| 91374947         | 2,28         |              |              |             | 3'-5'        |    | 25        | 428        |
| 91869472         | 2,095        |              |              |             | 3'-5'        |    | 22        | 383        |
| 92393917         | 2,72         |              |              |             | 3'-5'        |    | 35        | 378        |
| 92536038         | 2,535        |              |              |             | 3'-5'        |    | 33        | 361        |
| 92840882         | 1,88         |              |              |             | 3'-5'        |    | 52        | 438        |
| 93956078         | 1,965        |              |              |             | 3'-5'        |    | 53        | 411        |
| 94463135         | 1,96         |              |              |             | 3'-5'        |    | 20        | 376        |
| 95188287         | 2,765        |              |              |             | 3'-5'        |    | 36        | 397        |
| 96585480         | 2,265        | FUT9         | 5'-3'        | I 1         | 3'-5'        | ok | 25        | 387        |
| <b>96685186</b>  | <b>2,31</b>  | <b>FUT9</b>  | <b>5'-3'</b> | <b>I 2</b>  | <b>3'-5'</b> | ok | <b>24</b> | <b>406</b> |
| 97583394         | 1,245        | KLHL32       | 5'-3'        | I 3         | 3'-5'        | ok | 17        | 555        |
| 98102280         | 1,94         |              |              |             | 3'-5'        |    | 33        | 242        |
| 98743150         | 2,275        |              |              |             | 3'-5'        |    | 47        | 409        |
| 99268609         | 2,31         |              |              |             | 3'-5'        |    | 24        | 412        |
| 100296600        | 2,16         |              |              |             | 3'-5'        |    | 31        | 512        |
| 100464026        | 1,895        |              |              |             | 3'-5'        |    | 18        | 383        |
| <b>101980304</b> | <b>1,075</b> | <b>GRIK2</b> | <b>5'-3'</b> | <b>I 1</b>  | <b>3'-5'</b> | ok | <b>16</b> | <b>579</b> |
| 103079067        | 1,845        |              |              |             | 3'-5'        |    | 18        | 445        |
| 103377192        | 2,43         |              |              |             | 3'-5'        |    | 29        | 438        |
| 104301810        | 1,275        |              |              |             | 3'-5'        |    | 50        | 579        |
| 104584938        | 1,31         |              |              |             | 3'-5'        |    | 18        | 552        |
| 105089529        | 2,175        |              |              |             | 3'-5'        |    | 36        | 539        |
| 105636730        | 1,4          | LIN28B       | 5'-3'        | E 4         | 3'-5'        | ok | 18        | 534        |
| 106089715        | 2,77         |              |              |             | 3'-5'        |    | 36        | 420        |
| 109065323        | 1,595        | FOXO3        | 5'-3'        | I 1         | 3'-5'        | ok | 49        | 525        |
| 109214747        | 2,09         |              |              |             | 3'-5'        |    | 29        | 312        |
| 109557787        | 1,73         | C6orf182     | 5'-3'        | I 1         | 3'-5'        | ok | 50        | 330        |
| 111004605        | 1,585        |              |              |             | 3'-5'        |    | 52        | 497        |
| <b>111765829</b> | <b>2,17</b>  | <b>REV3L</b> | <b>3'-5'</b> | <b>I 23</b> | <b>3'-5'</b> | no | <b>23</b> | <b>430</b> |
| 112676158        | 2,5          | LAMA4        | 3'-5'        | I 2         | 3'-5'        | no | 31        | 374        |
| 112991552        | 2,695        |              |              |             | 3'-5'        |    | 32        | 403        |
| 114504272        | 2,595        |              |              |             | 3'-5'        |    | 38        | 383        |
| 114794458        | 1,79         |              |              |             | 3'-5'        |    | 49        | 486        |
| 115181284        | 2,795        |              |              |             | 3'-5'        |    | 34        | 415        |
| 115598927        | 2,29         |              |              |             | 3'-5'        |    | 37        | 312        |
| 116033813        | 2,21         |              |              |             | 3'-5'        |    | 45        | 442        |
| 116891556        | 2,595        | FAM26F       | 5'-3'        | E 3         | 3'-5'        | ok | 30        | 403        |
| 118573152        | 2,26         | SLC35F1      | 5'-3'        | I 1         | 3'-5'        | ok | 23        | 406        |

|           |       |        |       |             |       |    |              |               |
|-----------|-------|--------|-------|-------------|-------|----|--------------|---------------|
| 120974090 | 2,415 |        |       |             | 3'-5' |    | 44           | 411           |
| 121367503 | 2,05  |        |       |             | 3'-5' |    | 24           | 354           |
| 123459246 | 2,765 |        |       |             | 3'-5' |    | 36           | 421           |
| 124687960 | 2,6   | NKAIN2 | 5'-3' | 1 2         | 3'-5' | ok | 30           | 414           |
| 126984592 | 2,74  |        |       |             | 3'-5' |    | 36           | 392           |
| 127191306 | 2,825 |        |       |             | 3'-5' |    | 36           | 409           |
| 129058053 | 1,87  |        |       |             | 3'-5' |    | 23           | 490           |
| 131888214 | 2,715 |        |       |             | 3'-5' |    | 37           | 421           |
| 132837920 | 2,145 | STX7   | 3'-5' | 1 3 E 3 1 2 | 3'-5' | no | 31           | 303           |
| 132959554 | 2,45  |        |       |             | 3'-5' |    | 27           | 404           |
| 133440444 | 1,13  |        |       |             | 3'-5' |    | 52           | 588           |
| 134739342 | 1,445 |        |       |             | 3'-5' |    | 50           | 545           |
| 135354464 | 2,525 | HBS1L  | 3'-5' | 1 8         | 3'-5' | no | 36           | 469           |
| 136604598 | 2,575 | FAM54A | 3'-5' | 1 4         | 3'-5' | no | 33           | 449           |
| 138028511 | 2,285 |        |       |             | 3'-5' |    | 25           | 427           |
| 138046142 | 1,315 |        |       |             | 3'-5' |    | 47           | 601           |
| 140371039 | 2,645 |        |       |             | 3'-5' |    | 31           | 415           |
| 140634175 | 1,895 |        |       |             | 3'-5' |    | 53           | 393           |
| 141062349 | 2,14  |        |       |             | 3'-5' |    | 22           | 426           |
| 141605616 | 2,6   |        |       |             | 3'-5' |    | 39           | 424           |
| 141618704 | 2,225 |        |       |             | 3'-5' |    | 48           | 409           |
| 142169185 | 2,63  |        |       |             | 3'-5' |    | 33           | 438           |
| 142214965 | 1,785 |        |       |             | 3'-5' |    | 18           | 361           |
| 142579135 | 1,9   | VTA1   | 5'-3' | 1 7         | 3'-5' | ok | 49           | 464           |
| 144802435 | 2,205 | UTRN   | 5'-3' | 1 11        | 3'-5' | ok | 26           | 365           |
| 145953981 | 2,22  |        |       |             | 3'-5' |    | 23           | 398           |
| 148086094 | 2,14  |        |       |             | 3'-5' |    | 29           | 496           |
| 150752594 | 1,83  | IYD    | 5'-3' | 1 2         | 3'-5' | ok | 20           | 350           |
| 152299797 | 2,535 | ESR1   | 5'-3' | 1 3         | 3'-5' | ok | 29           | 401           |
| 153858825 | 1,93  |        |       |             | 3'-5' |    | 49           | 458           |
| 154428475 | 1,875 | OPRM1  | 5'-3' | 1 1         | 3'-5' | ok | 54           | 399           |
| 155246000 | 2,685 |        |       |             | 3'-5' |    | 37           | 427           |
| 162989723 | 2,76  | PARK2  | 3'-5' | 1 1         | 3'-5' | no | 34           | 396           |
| 163058485 | 2,505 | PARK2  | 3'-5' | 1 1         | 3'-5' | no | 30           | 385           |
| 163858314 | 1,695 | QKI    | 5'-3' | 1 3         | 3'-5' | ok | 41           | 233           |
| 165402747 | 2,32  |        |       |             | 3'-5' |    | 25           | 398           |
| 167803421 | 1,3   |        |       |             | 3'-5' |    | 47           | 214           |
| 168837815 | 2,12  |        |       |             | 3'-5' |    | 31           | 298           |
|           |       |        |       | <b>57</b>   |       | 94 | <b>33,88</b> | <b>411,63</b> |
|           |       |        |       | <b>37</b>   |       | 44 | <b>32,72</b> | <b>413,78</b> |

Ø

|             |          |       |         | 94    |  | 329       |       | 34,48 | 410,52 |     |
|-------------|----------|-------|---------|-------|--|-----------|-------|-------|--------|-----|
| 7           | 3894155  | 1,715 | SDK1    | 5'-3' |  | 15        | 5'-3' | no    | 24     | 287 |
|             | 5014157  | 2,4   |         |       |  |           | 5'-3' |       | 30     | 454 |
| 242 results | 7447012  | 1,88  | COL28A1 | 3'-5' |  | E 21   20 | 5'-3' | ok    | 16     | 400 |
|             | 8161308  | 1,795 | ICA1    | 3'-5' |  | 18        | 5'-3' | ok    | 42     | 263 |
|             | 8792971  | 2,53  |         |       |  |           | 5'-3' |       | 29     | 400 |
|             | 11483127 | 2,63  | THSD7A  | 3'-5' |  | 17        | 5'-3' | ok    | 39     | 418 |
|             | 11720560 | 2,72  |         |       |  |           | 5'-3' |       | 33     | 398 |
|             | 11902682 | 2,225 |         |       |  |           | 5'-3' |       | 24     | 429 |
|             | 13846731 | 2,45  |         |       |  |           | 5'-3' |       | 27     | 414 |
|             | 14852134 | 2,275 |         |       |  |           | 5'-3' |       | 23     | 409 |
|             | 16623653 | 2,225 | ANKMY2  | 3'-5' |  | 14        | 5'-3' | ok    | 48     | 409 |
|             | 18983225 | 2,42  | HDAC9   | 5'-3' |  | 125       | 5'-3' | no    | 38     | 348 |
|             | 19339303 | 2,03  |         |       |  |           | 5'-3' |       | 48     | 448 |
|             | 20270104 | 1,97  |         |       |  |           | 5'-3' |       | 21     | 368 |
|             | 21728693 | 2,015 | DNAH11  | 5'-3' |  | 144       | 5'-3' | no    | 21     | 377 |
|             | 22826449 | 1,67  | TOMM7   | 3'-5' |  | 11        | 5'-3' | ok    | 19     | 490 |
|             | 23078720 | 2,595 |         |       |  |           | 5'-3' |       | 40     | 415 |
|             | 23100469 | 2,135 |         |       |  |           | 5'-3' |       | 43     | 477 |
|             | 24436057 | 1,83  |         |       |  |           | 5'-3' |       | 27     | 538 |
|             | 25682572 | 2,22  |         |       |  |           | 5'-3' |       | 45     | 378 |
|             | 25851205 | 2,235 |         |       |  |           | 5'-3' |       | 30     | 331 |
|             | 26668305 | 1,99  |         |       |  |           | 5'-3' |       | 36     | 242 |
|             | 30532854 | 2,14  |         |       |  |           | 5'-3' |       | 31     | 516 |
|             | 35125808 | 2,325 |         |       |  |           | 5'-3' |       | 45     | 399 |
|             | 35836804 | 2,665 | SEPT7   | 5'-3' |  | 12        | 5'-3' | no    | 37     | 431 |
|             | 36201943 | 2,545 | EEPD1   | 5'-3' |  | 12        | 5'-3' | no    | 32     | 445 |
|             | 38050929 | 2,02  |         |       |  |           | 5'-3' |       | 25     | 480 |
|             | 38719951 | 2,735 |         |       |  |           | 5'-3' |       | 35     | 381 |
|             | 39083904 | 2,005 | POU6F2  | 5'-3' |  | 11        | 5'-3' | no    | 49     | 375 |
|             | 40740515 | 1,74  | C7orf10 | 5'-3' |  | 113       | 5'-3' | no    | 47     | 302 |
|             | 40790778 | 2,62  | C7orf10 | 5'-3' |  | 114       | 5'-3' | no    | 38     | 430 |
|             | 41001549 | 2,415 |         |       |  |           | 5'-3' |       | 35     | 501 |
|             | 42264662 | 2,055 |         |       |  |           | 5'-3' |       | 51     | 405 |
|             | 44611796 | 2,06  |         |       |  |           | 5'-3' |       | 20     | 396 |
|             | 45359953 | 2,44  |         |       |  |           | 5'-3' |       | 30     | 446 |
|             | 46486050 | 2,645 |         |       |  |           | 5'-3' |       | 33     | 435 |
|             | 49516605 | 1,39  |         |       |  |           | 5'-3' |       | 18     | 282 |
|             | 49737644 | 1,625 |         |       |  |           | 5'-3' |       | 16     | 469 |

|                 |              |              |              |                 |              |           |           |            |
|-----------------|--------------|--------------|--------------|-----------------|--------------|-----------|-----------|------------|
| 49757160        | 1,88         |              |              |                 | 5'-3'        |           | 45        | 310        |
| 50901563        | 2,66         |              |              |                 | 5'-3'        |           | 39        | 406        |
| 52980325        | 2,03         |              |              |                 | 5'-3'        |           | 50        | 428        |
| 53231329        | 2,81         |              |              |                 | 5'-3'        |           | 36        | 406        |
| 53386204        | 2,2          |              |              |                 | 5'-3'        |           | 42        | 474        |
| 53389588        | 1,875        |              |              |                 | 5'-3'        |           | 25        | 509        |
| 53688059        | 2,71         |              |              |                 | 5'-3'        |           | 33        | 422        |
| 54590872        | 2,255        | VSTM2A       | 5'-3'        | 4               | 5'-3'        | no        | 23        | 413        |
| 63994953        | 2,045        |              |              |                 | 5'-3'        |           | 46        | 353        |
| 65890085        | 2,56         | RABGEF1      | 5'-3'        | 4               | 5'-3'        | no        | 41        | 406        |
| 69903764        | 1,645        |              |              |                 | 5'-3'        |           | 48        | 525        |
| 71258633        | 2,29         | CALN1        | 3'-5'        | 2               | 5'-3'        | ok        | 33        | 312        |
| <b>71408635</b> | <b>2,145</b> | <b>CALN1</b> | <b>3'-5'</b> | <b>  1</b>      | <b>5'-3'</b> | <b>ok</b> | <b>46</b> | <b>445</b> |
| 71493638        | 1,625        | CALN1        | 3'-5'        | 2               | 5'-3'        | ok        | 22        | 289        |
| 72829215        | 2,63         |              |              |                 | 5'-3'        |           | 38        | 390        |
| 72996614        | 1,85         |              |              |                 | 5'-3'        |           | 30        | 564        |
| 81422160        | 2,62         | CACNA2D1     | 3'-5'        | 38              | 5'-3'        | ok        | 38        | 388        |
| 83011161        | 2,225        | SEMA3E       | 3'-5'        | 1               | 5'-3'        | ok        | 37        | 299        |
| 83363879        | 2,78         |              |              |                 | 5'-3'        |           | 35        | 390        |
| 83862434        | 2,31         |              |              |                 | 5'-3'        |           | 31        | 482        |
| 84147714        | 1,91         |              |              |                 | 5'-3'        |           | 48        | 346        |
| 85101254        | 2,745        |              |              |                 | 5'-3'        |           | 37        | 403        |
| 85482927        | 2,46         |              |              |                 | 5'-3'        |           | 27        | 412        |
| 86107643        | 2,47         |              |              |                 | 5'-3'        |           | 27        | 410        |
| 90192778        | 2,185        | PFTK1        | 5'-3'        | 1               | 5'-3'        | no        | 48        | 417        |
| 93451520        | 2,155        |              |              |                 | 5'-3'        |           | 26        | 355        |
| 93523803        | 1,56         |              |              |                 | 5'-3'        |           | 51        | 512        |
| 93649991        | 1,995        |              |              |                 | 5'-3'        |           | 20        | 383        |
| 96989389        | 2,795        |              |              |                 | 5'-3'        |           | 36        | 415        |
| 97224516        | 2,44         |              |              |                 | 5'-3'        |           | 28        | 392        |
| 98415200        | 2,185        | TRRAP        | 5'-3'        | 56              | 5'-3'        | no        | 40        | 321        |
| 98962987        | 2,605        | ZKSCAN5      | 5'-3'        | 6               | 5'-3'        | no        | 40        | 413        |
| 99001644        | 2,305        | ZNF655       | 5'-3'        | 2               | 5'-3'        | no        | 29        | 463        |
| 102571466       | 2,12         | NAPEPLD      | 3'-5'        | 1               | 5'-3'        | ok        | 24        | 450        |
| 102639866       | 2,31         |              |              |                 | 5'-3'        |           | 25        | 396        |
| 103606503       | 1,74         | ORC5L        | 3'-5'        | 8               | 5'-3'        | ok        | 16        | 446        |
| 106663888       | 1,93         | COG5         | 3'-5'        | 18 E 18   17    | 5'-3'        | ok        | 50        | 448        |
| 107653310       | 2,22         | NRCAM        | 3'-5'        | 10 E 10   9 E 9 | 5'-3'        | ok        | 38        | 510        |
| 108792990       | 2,805        |              |              |                 | 5'-3'        |           | 34        | 413        |
| 108964988       | 2,345        |              |              |                 | 5'-3'        |           | 45        | 415        |



|           |       |         |       |      |       |    |    |     |
|-----------|-------|---------|-------|------|-------|----|----|-----|
| 111198820 | 2,515 | DOCK4   | 3'-5' | 1 35 | 5'-3' | ok | 39 | 377 |
| 112750186 | 2,255 |         |       |      | 5'-3' |    | 43 | 453 |
| 114019673 | 1,92  | FOXP2   | 5'-3' | 1 3  | 5'-3' | no | 17 | 398 |
| 114494958 | 1,74  |         |       |      | 5'-3' |    | 48 | 506 |
| 114835388 | 2,26  |         |       |      | 5'-3' |    | 43 | 366 |
| 114967468 | 2,13  |         |       |      | 5'-3' |    | 26 | 350 |
| 115063027 | 2,445 |         |       |      | 5'-3' |    | 38 | 465 |
| 115178551 | 2,63  |         |       |      | 5'-3' |    | 39 | 418 |
| 115185223 | 2,425 |         |       |      | 5'-3' |    | 28 | 429 |
| 115307040 | 2,205 |         |       |      | 5'-3' |    | 43 | 355 |
| 115449937 | 1,76  | TFEC    | 3'-5' | 1 1  | 5'-3' | ok | 21 | 326 |
| 115600979 | 2,19  |         |       |      | 5'-3' |    | 32 | 302 |
| 115853861 | 2,18  |         |       |      | 5'-3' |    | 43 | 468 |
| 117629916 | 2,295 |         |       |      | 5'-3' |    | 39 | 485 |
| 118247721 | 2,485 |         |       |      | 5'-3' |    | 38 | 457 |
| 118409126 | 1,855 |         |       |      | 5'-3' |    | 43 | 533 |
| 119878547 | 1,995 | KCND2   | 5'-3' | 1 1  | 5'-3' | no | 45 | 333 |
| 119954399 | 1,92  | KCND2   | 5'-3' | 1 1  | 5'-3' | no | 18 | 430 |
| 120389884 | 2,545 | ING3    | 5'-3' | 1 4  | 5'-3' | no | 38 | 445 |
| 120570000 | 1,93  | C7orf58 | 5'-3' | 1 16 | 5'-3' | no | 50 | 370 |
| 123565459 | 2,75  |         |       |      | 5'-3' |    | 36 | 394 |
| 125233097 | 2,15  |         |       |      | 5'-3' |    | 40 | 504 |
| 125592637 | 2,275 |         |       |      | 5'-3' |    | 43 | 449 |
| 125853593 | 1,725 |         |       |      | 5'-3' |    | 20 | 329 |
| 126611454 | 2,14  | GRM8    | 3'-5' | 1 1  | 5'-3' | ok | 37 | 536 |
| 126795993 | 1,605 |         |       |      | 5'-3' |    | 23 | 275 |
| 127014453 | 2,29  |         |       |      | 5'-3' |    | 26 | 382 |
| 127070527 | 2,07  |         |       |      | 5'-3' |    | 44 | 480 |
| 127979390 | 2,09  |         |       |      | 5'-3' |    | 48 | 382 |
| 128662962 | 1,61  | AHCYL2  | 5'-3' | 1 1  | 5'-3' | no | 16 | 472 |
| 130054469 | 2,42  |         |       |      | 5'-3' |    | 40 | 450 |
| 132067792 | 2,39  |         |       |      | 5'-3' |    | 41 | 446 |
| 136216426 | 2,59  | CHRM2   | 5'-3' | 1 2  | 5'-3' | no | 31 | 426 |
| 137938214 | 1,91  | SVOPL   | 5'-3' | 1 10 | 5'-3' | no | 19 | 442 |
| 140904142 | 2,57  | AGK     | 5'-3' | 1 2  | 5'-3' | no | 32 | 440 |
| 141669282 | 2,365 |         |       |      | 5'-3' |    | 45 | 407 |
| 143379883 | 2,74  |         |       |      | 5'-3' |    | 33 | 416 |
| 143406897 | 1,825 |         |       |      | 5'-3' |    | 39 | 239 |
| 145160586 | 2,23  |         |       |      | 5'-3' |    | 47 | 418 |
| 145923696 | 2,18  | CNTNAP2 | 5'-3' | 1 1  | 5'-3' | no | 47 | 390 |

|                 |             |                |              |            |              |           |           |            |
|-----------------|-------------|----------------|--------------|------------|--------------|-----------|-----------|------------|
| 147342512       | 2,41        | CNTNAP2        | 5'-3'        | 15         | 5'-3'        | no        | 41        | 442        |
| 147403111       | 1,795       | CNTNAP2        | 5'-3'        | 15         | 5'-3'        | no        | 43        | 545        |
| 148311712       | 2,14        |                |              |            | 5'-3'        |           | 29        | 496        |
| 152314046       | 2,585       |                |              |            | 5'-3'        |           | 31        | 391        |
| 154827537       | 1,975       |                |              |            | 5'-3'        |           | 44        | 319        |
| 7546702         | 2,17        |                |              |            | 3'-5'        |           | 40        | 500        |
| 7906457         | 1,56        |                |              |            | 3'-5'        |           | 17        | 492        |
| 9010129         | 1,97        |                |              |            | 3'-5'        |           | 42        | 520        |
| 11445406        | 2,23        | THSD7A         | 3'-5'        | 13         | 3'-5'        | no        | 30        | 330        |
| 11666764        | 2,035       | THSD7A         | 3'-5'        | 1          | 3'-5'        | no        | 21        | 437        |
| 12447669        | 1,89        |                |              |            | 3'-5'        |           | 17        | 392        |
| 14135353        | 2,41        |                |              |            | 3'-5'        |           | 40        | 366        |
| 14235974        | 2,055       | DGKB           | 3'-5'        | 22         | 3'-5'        | no        | 51        | 413        |
| 14946575        | 2,2         |                |              |            | 3'-5'        |           | 42        | 474        |
| 17302154        | 2,13        |                |              |            | 3'-5'        |           | 24        | 448        |
| 18869250        | 2,48        | HDAC9          | 5'-3'        | 21         | 3'-5'        | ok        | 33        | 468        |
| 20861899        | 2,485       |                |              |            | 3'-5'        |           | 34        | 341        |
| 21576770        | 2,25        | DNAH11         | 5'-3'        | 7          | 3'-5'        | ok        | 23        | 414        |
| 22630256        | 2,46        |                |              |            | 3'-5'        |           | 30        | 376        |
| 25796602        | 2,66        |                |              |            | 3'-5'        |           | 38        | 396        |
| 27663638        | 2,33        | HIBADH         | 3'-5'        | 1          | 3'-5'        | no        | 45        | 400        |
| 28426045        | 2,55        | CREB5          | 5'-3'        | 1          | 3'-5'        | ok        | 32        | 374        |
| 29348330        | 2           | CHN2           | 5'-3'        | 1          | 3'-5'        | ok        | 21        | 374        |
| 31870530        | 2,205       | PDE1C          | 3'-5'        | 8 E 8      | 3'-5'        | no        | 45        | 375        |
| 35326189        | 2,175       |                |              |            | 3'-5'        |           | 48        | 399        |
| 36451677        | 2,275       | ANLN           | 5'-3'        | 22         | 3'-5'        | ok        | 29        | 349        |
| 36703270        | 1,8         | AOAH           | 3'-5'        | 1          | 3'-5'        | no        | 27        | 274        |
| 40751461        | 1,865       | C7orf10        | 5'-3'        | 13         | 3'-5'        | ok        | 54        | 421        |
| 43132299        | 2,325       | HECW1          | 5'-3'        | 2          | 3'-5'        | ok        | 29        | 459        |
| 46131531        | 2,19        |                |              |            | 3'-5'        |           | 24        | 436        |
| 49525437        | 1,365       |                |              |            | 3'-5'        |           | 21        | 247        |
| 50154471        | 1,96        |                |              |            | 3'-5'        |           | 18        | 396        |
| 51373157        | 2,31        |                |              |            | 3'-5'        |           | 46        | 406        |
| 53564335        | 2,04        |                |              |            | 3'-5'        |           | 24        | 352        |
| 53856529        | 2,62        |                |              |            | 3'-5'        |           | 30        | 408        |
| 54981079        | 2,74        |                |              |            | 3'-5'        |           | 36        | 392        |
| 63209464        | 2,195       |                |              |            | 3'-5'        |           | 44        | 363        |
| 64034824        | 2,155       |                |              |            | 3'-5'        |           | 44        | 463        |
| <b>65898181</b> | <b>1,99</b> | <b>RABGEF1</b> | <b>5'-3'</b> | <b>  5</b> | <b>3'-5'</b> | <b>ok</b> | <b>19</b> | <b>392</b> |
| 68051773        | 1,805       |                |              |            | 3'-5'        |           | 32        | 593        |

|           |       |             |       |      |       |    |    |     |
|-----------|-------|-------------|-------|------|-------|----|----|-----|
| 68754502  | 2,14  | AUTS2       | 5'-3' | 1    | 3'-5' | ok | 22 | 392 |
| 69068231  | 2,245 | AUTS2       | 5'-3' | 2    | 3'-5' | ok | 27 | 363 |
| 72825755  | 2,49  |             |       |      | 3'-5' |    | 38 | 456 |
| 76068594  | 2,2   |             |       |      | 3'-5' |    | 28 | 474 |
| 77826722  | 2,665 | MAGI2       | 3'-5' | 7    | 3'-5' | no | 39 | 411 |
| 78194820  | 1,785 | MAGI2       | 3'-5' | 2    | 3'-5' | no | 46 | 301 |
| 78541467  | 2,26  | MAGI2       | 3'-5' | 1    | 3'-5' | no | 28 | 356 |
| 78811475  | 1,845 | MAGI2       | 3'-5' | 1    | 3'-5' | no | 52 | 445 |
| 79820335  | 2,275 |             |       |      | 3'-5' |    | 39 | 489 |
| 79935856  | 2,43  | GNAT3       | 3'-5' | 5    | 3'-5' | no | 31 | 458 |
| 80208270  | 2,49  |             |       |      | 3'-5' |    | 29 | 426 |
| 80249164  | 2,72  | SEMA3C      | 3'-5' | 12   | 3'-5' | no | 38 | 410 |
| 80283250  | 2,465 | SEMA3C      | 3'-5' | 5    | 3'-5' | no | 41 | 431 |
| 80801489  | 2,34  |             |       |      | 3'-5' |    | 36 | 506 |
| 81020022  | 2,645 |             |       |      | 3'-5' |    | 33 | 435 |
| 81303693  | 2,66  |             |       |      | 3'-5' |    | 39 | 412 |
| 81754995  | 1,36  | CACNA2D1    | 3'-5' | 3    | 3'-5' | no | 49 | 572 |
| 82445316  | 2,42  | PCLO        | 3'-5' | 4    | 3'-5' | no | 43 | 420 |
| 83615579  | 2,205 | SEMA3A      | 3'-5' | 1    | 3'-5' | no | 37 | 523 |
| 84543881  | 2,01  | SEMA3D      | 3'-5' | 3    | 3'-5' | no | 50 | 432 |
| 85752296  | 2,485 |             |       |      | 3'-5' |    | 42 | 417 |
| 86847703  | 2,485 | CROT        | 5'-3' | 10   | 3'-5' | ok | 39 | 447 |
| 88002078  | 2,72  |             |       |      | 3'-5' |    | 33 | 420 |
| 88169164  | 2,13  |             |       |      | 3'-5' |    | 21 | 418 |
| 88207834  | 2,735 |             |       |      | 3'-5' |    | 37 | 417 |
| 88259758  | 1,825 | ZNF804B     | 5'-3' | 1    | 3'-5' | ok | 46 | 309 |
| 88469710  | 2,395 | ZNF804B     | 5'-3' | 1    | 3'-5' | ok | 44 | 403 |
| 89038181  | 2,455 |             |       |      | 3'-5' |    | 43 | 413 |
| 90334832  | 2,505 | PFTK1       | 5'-3' | 5    | 3'-5' | ok | 37 | 355 |
| 90400402  | 1,935 | PFTK1       | 5'-3' | 7    | 3'-5' | ok | 22 | 467 |
| 90456997  | 2,78  | PFTK1       | 5'-3' | 9    | 3'-5' | ok | 34 | 400 |
| 91413617  | 1,905 | AKAP9       | 5'-3' | 1    | 3'-5' | ok | 52 | 433 |
| 91867611  | 2,52  | ANKIB1      | 5'-3' | E 21 | 3'-5' | ok | 39 | 440 |
| 92028917  | 2,155 | FAM133B     | 3'-5' | E 12 | 3'-5' | no | 23 | 433 |
| 92316671  | 2,43  |             |       |      | 3'-5' |    | 30 | 448 |
| 93633924  | 1,935 |             |       |      | 3'-5' |    | 48 | 467 |
| 95314747  | 2,72  | DYNC11I     | 5'-3' | 5    | 3'-5' | ok | 38 | 408 |
| 98068372  | 1,87  |             |       |      | 3'-5' |    | 54 | 420 |
| 102363594 | 1,755 | BXL13/LRRC1 | 3'-5' | 18/2 | 3'-5' | no | 29 | 245 |
| 103333813 | 2,085 | RELN        | 3'-5' | 2    | 3'-5' | no | 50 | 401 |

|           |       |         |       |           |       |    |    |     |
|-----------|-------|---------|-------|-----------|-------|----|----|-----|
| 109170196 | 1,635 |         |       |           | 3'-5' |    | 52 | 487 |
| 109305702 | 2,045 |         |       |           | 3'-5' |    | 51 | 403 |
| 109445485 | 1,96  |         |       |           | 3'-5' |    | 21 | 366 |
| 110328712 | 2,09  | IMMP2L  | 3'-5' | 14        | 3'-5' | no | 47 | 372 |
| 111796000 | 2,025 |         |       |           | 3'-5' |    | 19 | 419 |
| 112704789 | 2,05  |         |       |           | 3'-5' |    | 44 | 334 |
| 114246946 | 2,41  |         |       |           | 3'-5' |    | 37 | 336 |
| 114810440 | 2,095 |         |       |           | 3'-5' |    | 47 | 445 |
| 116532325 | 2,44  | ST7     | 5'-3' | 12        | 3'-5' | ok | 41 | 382 |
| 117681806 | 1,85  |         |       |           | 3'-5' |    | 18 | 444 |
| 117705857 | 1,84  |         |       |           | 3'-5' |    | 49 | 342 |
| 117845600 | 2,21  |         |       |           | 3'-5' |    | 48 | 412 |
| 119214873 | 2,53  |         |       |           | 3'-5' |    | 40 | 428 |
| 119215189 | 2,575 |         |       |           | 3'-5' |    | 31 | 389 |
| 120209602 | 2,505 |         |       |           | 3'-5' |    | 36 | 345 |
| 120605089 | 2,765 | C7orf58 | 5'-3' | 16        | 3'-5' | ok | 33 | 411 |
| 122008221 | 2,4   | CADPS2  | 3'-5' | 18 E 8 17 | 3'-5' | no | 26 | 404 |
| 122980923 | 2,065 | NDUFA5  | 3'-5' | 12        | 3'-5' | no | 26 | 337 |
| 122985394 | 1,925 |         |       |           | 3'-5' |    | 42 | 529 |
| 123386014 | 2,42  | SPAM1   | 5'-3' | 14        | 3'-5' | ok | 34 | 490 |
| 124579967 | 2,425 |         |       |           | 3'-5' |    | 30 | 369 |
| 125044598 | 2,705 |         |       |           | 3'-5' |    | 35 | 443 |
| 125271830 | 2,36  |         |       |           | 3'-5' |    | 25 | 412 |
| 125990676 | 2,72  | GRM8    | 3'-5' | 17        | 3'-5' | no | 38 | 408 |
| 126273743 | 2,435 | GRM8    | 3'-5' | 15        | 3'-5' | no | 29 | 381 |
| 126568989 | 2,635 | GRM8    | 3'-5' | 11        | 3'-5' | no | 31 | 417 |
| 130028851 | 2,17  |         |       |           | 3'-5' |    | 38 | 298 |
| 130179629 | 1,86  |         |       |           | 3'-5' |    | 53 | 386 |
| 130822956 | 1,765 | MKLN1   | 5'-3' | E 18      | 3'-5' | ok | 23 | 511 |
| 133319789 | 1,985 | EXOC4   | 5'-3' | 14        | 3'-5' | ok | 31 | 547 |
| 133531692 | 1,555 | LRGUK   | 5'-3' | 112 E 13  | 3'-5' | ok | 51 | 305 |
| 134711679 | 2,3   | CNOT4   | 3'-5' | 110       | 3'-5' | no | 43 | 374 |
| 135173524 | 2,175 |         |       |           | 3'-5' |    | 29 | 329 |
| 135280697 | 2,435 | MTPN    | 3'-5' | 13        | 3'-5' | no | 30 | 371 |
| 135520875 | 1,475 |         |       |           | 3'-5' |    | 52 | 299 |
| 135619502 | 2,565 |         |       |           | 3'-5' |    | 35 | 347 |
| 137522761 | 2,39  |         |       |           | 3'-5' |    | 35 | 506 |
| 140752430 | 2,015 |         |       |           | 3'-5' |    | 24 | 347 |
| 144640173 | 2,37  |         |       |           | 3'-5' |    | 45 | 408 |
| 144805678 | 2,505 |         |       |           | 3'-5' |    | 28 | 413 |

|             |                |              |              |           |            |              |           |              |               |
|-------------|----------------|--------------|--------------|-----------|------------|--------------|-----------|--------------|---------------|
|             | 146255044      | 2,135        | CNTNAP2      | 5'-3'     | 1 3        | 3'-5'        | ok        | 46           | 371           |
|             | 150111546      | 2            |              |           |            | 3'-5'        |           | 18           | 404           |
|             | 156424472      | 2,39         |              |           |            | 3'-5'        |           | 44           | 402           |
|             | 156717148      | 1,91         | UBE3C        | 5'-3'     | 1 18       | 3'-5'        | ok        | 50           | 366           |
| ∅           |                |              |              | <b>53</b> |            |              | <b>98</b> | <b>35,37</b> | <b>410,14</b> |
|             |                |              |              | <b>45</b> |            |              | <b>54</b> | <b>35,34</b> | <b>403,56</b> |
|             |                |              |              | <b>98</b> |            |              | <b>44</b> | <b>35,39</b> | <b>414,63</b> |
| <b>8</b>    | 145721         | 1,585        |              |           | 1          | 5'-3'        |           | 27           | 231           |
|             | 2994691        | 1,255        | CSMD1        | 3'-5'     | 1 41       | 5'-3'        | ok        | 19           | 573           |
| 192 results | 3636460        | 2,16         | CSMD1        | 3'-5'     | 1 5        | 5'-3'        | ok        | 24           | 442           |
|             | 3996122        | 1,575        | CSMD1        | 3'-5'     | 1 3        | 5'-3'        | ok        | 19           | 309           |
|             | <b>4254167</b> | <b>2,125</b> | <b>CSMD1</b> | 3'-5'     | <b>1 3</b> | <b>5'-3'</b> | ok        | <b>50</b>    | <b>409</b>    |
|             | 7706974        | 1,705        | DEFB107B     | 3'-5'     | 1 1        | 5'-3'        | ok        | 16           | 365           |
|             | 9673104        | 2,66         | TNKS         | 5'-3'     | E 27       | 5'-3'        | no        | 36           | 376           |
|             | 10879086       | 2,43         | XKR6         | 3'-5'     | 1 1        | 5'-3'        | ok        | 31           | 360           |
|             | 12800207       | 2,215        |              |           |            | 5'-3'        |           | 38           | 511           |
|             | 14158066       | 2,27         | SGCZ         | 3'-5'     | 1 3        | 5'-3'        | ok        | 47           | 408           |
|             | 14158528       | 2,12         | SGCZ         | 3'-5'     | 1 3        | 5'-3'        | ok        | 44           | 348           |
|             | 14615761       | 2,68         | SGCZ         | 3'-5'     | 1 1        | 5'-3'        | ok        | 32           | 418           |
|             | 15523857       | 2,195        | TUSC3        | 5'-3'     | 1 1        | 5'-3'        | no        | 40           | 323           |
|             | 16168367       | 2,725        |              |           |            | 5'-3'        |           | 36           | 389           |
|             | 16461176       | 2,675        |              |           |            | 5'-3'        |           | 34           | 379           |
|             | 18793665       | 2,19         | PSD3         | 3'-5'     | 1 2        | 5'-3'        | ok        | 43           | 352           |
|             | 21347343       | 1,475        |              |           |            | 5'-3'        |           | 48           | 259           |
|             | 24708280       | 1,895        |              |           |            | 5'-3'        |           | 41           | 545           |
|             | 25348968       | 2,575        | KCTD9        | 3'-5'     | 1 8        | 5'-3'        | ok        | 31           | 429           |
|             | 30582791       | 2,03         | GTF2E2       | 3'-5'     | 1 6        | 5'-3'        | ok        | 21           | 438           |
|             | 30990177       | 2,015        | PURG         | 3'-5'     | 1 1        | 5'-3'        | ok        | 40           | 287           |
|             | 32947403       | 1,88         |              |           |            | 5'-3'        |           | 48           | 340           |
|             | 35995078       | 2,32         |              |           |            | 5'-3'        |           | 45           | 398           |
|             | 36569565       | 2,82         |              |           |            | 5'-3'        |           | 36           | 410           |
|             | 36763427       | 2,34         | KCNU1        | 5'-3'     | 1 1 E 2    | 5'-3'        | no        | 27           | 382           |
|             | 38343638       | 2,8          | WHSC1L1      | 3'-5'     | 1 1        | 5'-3'        | ok        | 36           | 404           |
|             | 38344428       | 1,94         | WHSC1L1      | 3'-5'     | 1 1        | 5'-3'        | ok        | 38           | 566           |
|             | 40242910       | 2,62         |              |           |            | 5'-3'        |           | 37           | 378           |
|             | 40310699       | 1,295        |              |           |            | 5'-3'        |           | 50           | 575           |
|             | 40654974       | 2,635        | ZMAT4        | 3'-5'     | 1 4        | 5'-3'        | ok        | 31           | 401           |
|             | 41933232       | 2,42         | MYST3        | 3'-5'     | 1 12       | 5'-3'        | ok        | 38           | 348           |
|             | 49419337       | 2,695        |              |           |            | 5'-3'        |           | 38           | 403           |

|                 |              |         |       |    |              |    |           |            |
|-----------------|--------------|---------|-------|----|--------------|----|-----------|------------|
| 50975561        | 2,065        |         |       |    | 5'-3'        |    | 43        | 491        |
| 51613328        | 2,15         | SNTG1   | 5'-3' | 11 | 5'-3'        | no | 22        | 394        |
| 52545633        | 1,665        | PXDNL   | 3'-5' | 8  | 5'-3'        | ok | 46        | 541        |
| 53401712        | 1,975        | ST18    | 3'-5' | 2  | 5'-3'        | ok | 51        | 429        |
| 54172319        | 1,87         |         |       |    | 5'-3'        |    | 44        | 520        |
| 59651788        | 2,445        | SDCBP   | 5'-3' | 5  | 5'-3'        | no | 42        | 425        |
| 59685606        | 1,16         | NSMAF   | 3'-5' | 9  | 5'-3'        | ok | 17        | 572        |
| 65775312        | 2,54         | CYP7B1  | 3'-5' | 1  | 5'-3'        | ok | 31        | 436        |
| 66015062        | 1,845        |         |       |    | 5'-3'        |    | 27        | 283        |
| 66432453        | 1,845        |         |       |    | 5'-3'        |    | 19        | 455        |
| 69586985        | 2,715        | C8orf34 | 5'-3' | 4  | 5'-3'        | no | 33        | 397        |
| 72525576        | 2,435        |         |       |    | 5'-3'        |    | 43        | 401        |
| <b>72562268</b> | <b>2,805</b> |         |       |    | <b>5'-3'</b> |    | <b>35</b> | <b>395</b> |
| 73293804        | 2,04         |         |       |    | 5'-3'        |    | 20        | 392        |
| 74666195        | 2,235        | STAU2   | 3'-5' | 10 | 5'-3'        | ok | 47        | 417        |
| 78365187        | 2,01         |         |       |    | 5'-3'        |    | 19        | 396        |
| 81517861        | 2,82         |         |       |    | 5'-3'        |    | 34        | 408        |
| 83432935        | 2,685        |         |       |    | 5'-3'        |    | 33        | 391        |
| 85505027        | 2,8          | RALYL   | 5'-3' | 1  | 5'-3'        | no | 36        | 414        |
| 86720416        | 2,155        |         |       |    | 5'-3'        |    | 49        | 413        |
| 89710562        | 2,495        |         |       |    | 5'-3'        |    | 32        | 363        |
| 90003569        | 1,895        |         |       |    | 5'-3'        |    | 16        | 415        |
| 90991596        | 1,925        | OSGIN2  | 5'-3' | 2  | 5'-3'        | no | 16        | 409        |
| 92492428        | 2,015        |         |       |    | 5'-3'        |    | 51        | 397        |
| 92936603        | 2,42         |         |       |    | 5'-3'        |    | 31        | 358        |
| 93214502        | 1,825        |         |       |    | 5'-3'        |    | 30        | 569        |
| 94500873        | 2,37         |         |       |    | 5'-3'        |    | 45        | 410        |
| 96747142        | 2,5          |         |       |    | 5'-3'        |    | 31        | 444        |
| 97814619        | 2,135        | PGCP    | 5'-3' | 1  | 5'-3'        | no | 21        | 417        |
| 99878568        | 2,505        | STK3    | 3'-5' | 1  | 5'-3'        | ok | 29        | 395        |
| 100085712       | 2,26         |         |       |    | 5'-3'        |    | 23        | 406        |
| 100587039       | 2,615        | VPS13B  | 5'-3' | 27 | 5'-3'        | no | 32        | 387        |
| 101508398       | 1,69         |         |       |    | 5'-3'        |    | 31        | 212        |
| 102672564       | 2,48         | GRHL2   | 5'-3' | 7  | 5'-3'        | no | 39        | 448        |
| 106658256       | 2,555        | ZFPM2   | 5'-3' | 4  | 5'-3'        | no | 29        | 413        |
| 108752081       | 2,25         |         |       |    | 5'-3'        |    | 31        | 494        |
| 109378251       | 2,075        |         |       |    | 5'-3'        |    | 23        | 449        |
| 111140465       | 2,07         |         |       |    | 5'-3'        |    | 20        | 398        |
| 116244474       | 2,01         |         |       |    | 5'-3'        |    | 50        | 432        |
| 116768989       | 1,575        |         |       |    | 5'-3'        |    | 18        | 319        |

|                 |            |              |              |                |              |           |           |            |
|-----------------|------------|--------------|--------------|----------------|--------------|-----------|-----------|------------|
| 123125505       | 2,73       |              |              |                | 5'-3'        |           | 33        | 418        |
| 123499281       | 1,62       |              |              |                | 5'-3'        |           | 27        | 238        |
| 124026303       | 2,19       | ZHX2         | 5'-3'        | 1 2            | 5'-3'        | no        | 41        | 486        |
| 124225995       | 2,245      | WDR67        | 5'-3'        | 1 19 E 20   20 | 5'-3'        | no        | 28        | 353        |
| 124512440       | 1,82       | C8orf32      | 5'-3'        | 1 3            | 5'-3'        | no        | 49        | 480        |
| 127138433       | 1,95       |              |              |                | 5'-3'        |           | 19        | 434        |
| 127309421       | 2,31       |              |              |                | 5'-3'        |           | 34        | 306        |
| 129834428       | 2,28       |              |              |                | 5'-3'        |           | 39        | 330        |
| 130487709       | 1,735      |              |              |                | 5'-3'        |           | 44        | 271        |
| 131975718       | 1,965      | ADCY8        | 3'-5'        | 1 7            | 5'-3'        | ok        | 20        | 377        |
| 132777918       | 1,29       |              |              |                | 5'-3'        |           | 17        | 272        |
| 136595154       | 2,465      | KHDRBS3      | 5'-3'        | 1 1            | 5'-3'        | no        | 34        | 481        |
| 138155253       | 2,075      |              |              |                | 5'-3'        |           | 22        | 379        |
| 139391091       | 2,03       | FAM135B      | 3'-5'        | 1 3            | 5'-3'        | ok        | 22        | 370        |
| 683661          | 2,04       |              |              |                | 3'-5'        |           | 48        | 446        |
| 3634768         | 1,42       | CSMD1        | 3'-5'        | 1 5            | 3'-5'        | no        | 46        | 228        |
| 4714278         | 2,56       | CSMD1        | 3'-5'        | 1 1            | 3'-5'        | no        | 30        | 396        |
| 7353297         | 1,705      | DEFB107B     | 3'-5'        | 1 1            | 3'-5'        | no        | 16        | 365        |
| 11471438        | 1,525      |              |              |                | 3'-5'        |           | 18        | 509        |
| 13478697        | 2,135      |              |              |                | 3'-5'        |           | 38        | 527        |
| 13654248        | 2,62       |              |              |                | 3'-5'        |           | 36        | 450        |
| 14851166        | 2,06       | SGCZ         | 3'-5'        | 1 1            | 3'-5'        | no        | 24        | 462        |
| 14923359        | 1,33       | SGCZ         | 3'-5'        | 1 1            | 3'-5'        | no        | 53        | 280        |
| 15093359        | 2,01       | SGCZ         | 3'-5'        | 1 1            | 3'-5'        | no        | 20        | 432        |
| 16041878        | 1,88       | MSR1         | 5'-3'        | 1 8/E 9        | 3'-5'        | ok        | 47        | 330        |
| 16202692        | 2,61       |              |              |                | 3'-5'        |           | 40        | 412        |
| <b>16998646</b> | <b>2,2</b> | <b>EFHA2</b> | <b>5'-3'</b> | <b>1 8</b>     | <b>3'-5'</b> | <b>ok</b> | <b>42</b> | <b>474</b> |
| 20055417        | 1,605      | SLC18A1      | 3'-5'        | 1 10           | 3'-5'        | no        | 53        | 483        |
| 21799486        | 2,025      |              |              |                | 3'-5'        |           | 21        | 439        |
| 21903439        | 2,26       | XPO7         | 5'-3'        | 1 16 E 17   17 | 3'-5'        | ok        | 42        | 356        |
| 23158459        | 2,185      | CHMP7        | 5'-3'        | 1 1            | 3'-5'        | ok        | 47        | 391        |
| 23369452        | 2,155      | ENTPD4       | 3'-5'        | 1 2            | 3'-5'        | no        | 37        | 533        |
| 23919819        | 1,38       |              |              |                | 3'-5'        |           | 19        | 548        |
| 28879942        | 2,435      | HMBOX1       | 5'-3'        | 1 3            | 3'-5'        | ok        | 43        | 401        |
| 31601266        | 2,31       |              |              |                | 3'-5'        |           | 46        | 412        |
| 31637496        | 2,49       | NRG1         | 5'-3'        | 1 1            | 3'-5'        | ok        | 41        | 426        |
| 31695349        | 1,135      | NRG1         | 5'-3'        | 1 1            | 3'-5'        | ok        | 51        | 597        |
| 32924712        | 1,79       |              |              |                | 3'-5'        |           | 37        | 606        |
| 34621760        | 2,27       |              |              |                | 3'-5'        |           | 47        | 408        |
| 34914252        | 1,845      |              |              |                | 3'-5'        |           | 43        | 283        |

|           |       |         |       |          |       |    |    |     |
|-----------|-------|---------|-------|----------|-------|----|----|-----|
| 34964210  | 2,81  |         |       |          | 3'-5' |    | 36 | 406 |
| 41385620  | 2,5   |         |       |          | 3'-5' |    | 28 | 414 |
| 43138909  | 2,58  | HGSNAT  | 5'-3' | 17       | 3'-5' | ok | 31 | 428 |
| 48315252  | 1,805 |         |       |          | 3'-5' |    | 38 | 593 |
| 50267533  | 2,485 |         |       |          | 3'-5' |    | 33 | 467 |
| 52014678  | 2,525 |         |       |          | 3'-5' |    | 31 | 439 |
| 52272189  | 2,445 |         |       |          | 3'-5' |    | 41 | 435 |
| 53668411  | 2,32  |         |       |          | 3'-5' |    | 26 | 388 |
| 57567080  | 2,695 |         |       |          | 3'-5' |    | 38 | 415 |
| 57936047  | 2,47  |         |       |          | 3'-5' |    | 28 | 420 |
| 59399911  | 2,54  |         |       |          | 3'-5' |    | 41 | 402 |
| 60355632  | 1,205 |         |       |          | 3'-5' |    | 49 | 603 |
| 62016230  | 1,945 |         |       |          | 3'-5' |    | 29 | 535 |
| 62477512  | 2,79  | RLBP1L1 | 5'-3' | 13       | 3'-5' | ok | 35 | 426 |
| 63279494  | 2,42  |         |       |          | 3'-5' |    | 42 | 430 |
| 64056603  | 2,315 | NKAIN3  | 5'-3' | 15       | 3'-5' | ok | 29 | 461 |
| 65226781  | 2,015 |         |       |          | 3'-5' |    | 22 | 451 |
| 67095943  | 1,915 | DNAJC5B | 5'-3' | E 111    | 3'-5' | ok | 27 | 521 |
| 67125084  | 1,755 | DNAJC5B | 5'-3' | 12       | 3'-5' | ok | 53 | 365 |
| 68204089  | 1,89  | CSPP1   | 5'-3' | 111      | 3'-5' | ok | 17 | 392 |
| 69697133  | 2,285 | C8orf34 | 5'-3' | 16       | 3'-5' | ok | 39 | 487 |
| 70087876  | 2,565 |         |       |          | 3'-5' |    | 33 | 367 |
| 70513327  | 2,43  |         |       |          | 3'-5' |    | 40 | 448 |
| 71272755  | 2,22  | NCOA2   | 3'-5' | 14       | 3'-5' | no | 22 | 410 |
| 72511767  | 2,58  |         |       |          | 3'-5' |    | 32 | 380 |
| 75421353  | 2,22  |         |       |          | 3'-5' |    | 26 | 450 |
| 78240257  | 2,74  |         |       |          | 3'-5' |    | 36 | 392 |
| 78358001  | 1,91  |         |       |          | 3'-5' |    | 51 | 376 |
| 79307360  | 1,68  |         |       |          | 3'-5' |    | 22 | 300 |
| 79350611  | 1,525 |         |       |          | 3'-5' |    | 16 | 329 |
| 83996126  | 2,555 |         |       |          | 3'-5' |    | 30 | 395 |
| 86915088  | 2,055 |         |       |          | 3'-5' |    | 28 | 503 |
| 91186620  | 2,345 |         |       |          | 3'-5' |    | 44 | 393 |
| 93707543  | 1,975 |         |       |          | 3'-5' |    | 36 | 239 |
| 95441791  | 1,58  |         |       |          | 3'-5' |    | 52 | 320 |
| 95934700  | 2,675 | INTS8   | 5'-3' | 113 E 14 | 3'-5' | ok | 32 | 419 |
| 96166900  | 2,815 |         |       |          | 3'-5' |    | 36 | 407 |
| 100207249 | 1,95  | VPS13B  | 5'-3' | 18       | 3'-5' | ok | 49 | 454 |
| 100537799 | 2,185 | VPS13B  | 5'-3' | 123      | 3'-5' | ok | 32 | 517 |
| 101024360 | 2,31  |         |       |          | 3'-5' |    | 45 | 422 |



|           |       |         |       |         |       |    |    |     |
|-----------|-------|---------|-------|---------|-------|----|----|-----|
| 101169004 | 1,88  | RGS22   | 3'-5' | 1 3     | 3'-5' | no | 48 | 340 |
| 101594554 | 2,215 |         |       |         | 3'-5' |    | 27 | 461 |
| 102654099 | 2,335 | GRHL2   | 5'-3' | 1 5     | 3'-5' | ok | 38 | 487 |
| 103045112 | 2,01  | NCALD   | 3'-5' | 1 3     | 3'-5' | no | 51 | 396 |
| 103676611 | 2,135 |         |       |         | 3'-5' |    | 21 | 401 |
| 104711158 | 2,61  | RIMS2   | 5'-3' | 1 1     | 3'-5' | ok | 39 | 396 |
| 104847697 | 2,785 | RIMS2   | 5'-3' | E 3   3 | 3'-5' | ok | 34 | 417 |
| 104948341 | 2,715 | RIMS2   | 5'-3' | 1 1     | 3'-5' | ok | 32 | 411 |
| 105164869 | 2,8   | RIMS2   | 5'-3' | 1 17    | 3'-5' | ok | 35 | 424 |
| 106394101 | 1,735 |         |       |         | 3'-5' |    | 38 | 211 |
| 106405147 | 2,58  | ZFPM2   | 5'-3' | 1 1     | 3'-5' | ok | 31 | 428 |
| 106698431 | 2,575 | ZFPM2   | 5'-3' | 1 4     | 3'-5' | ok | 31 | 389 |
| 107258046 | 2,68  |         |       |         | 3'-5' |    | 33 | 390 |
| 108386475 | 1,795 | ANGPT1  | 3'-5' | 1 4     | 3'-5' | no | 16 | 435 |
| 109688319 | 1,835 |         |       |         | 3'-5' |    | 18 | 371 |
| 109979737 | 2,805 |         |       |         | 3'-5' |    | 34 | 405 |
| 110955520 | 2,385 |         |       |         | 3'-5' |    | 39 | 467 |
| 111484046 | 2,525 |         |       |         | 3'-5' |    | 30 | 429 |
| 112512336 | 1,815 |         |       |         | 3'-5' |    | 53 | 377 |
| 113233950 | 2,29  |         |       |         | 3'-5' |    | 24 | 402 |
| 113366999 | 1,795 | CSMD3   | 3'-5' | 1 56    | 3'-5' | no | 47 | 505 |
| 113789423 | 2,715 | CSMD3   | 3'-5' | 1 12    | 3'-5' | no | 34 | 431 |
| 114696822 | 1,845 |         |       |         | 3'-5' |    | 47 | 323 |
| 115048010 | 2,47  |         |       |         | 3'-5' |    | 38 | 358 |
| 115066224 | 2,825 |         |       |         | 3'-5' |    | 36 | 409 |
| 115680857 | 1,9   |         |       |         | 3'-5' |    | 54 | 414 |
| 116059419 | 2,465 |         |       |         | 3'-5' |    | 39 | 367 |
| 117584247 | 2,115 |         |       |         | 3'-5' |    | 20 | 407 |
| 118037143 | 2,655 |         |       |         | 3'-5' |    | 33 | 433 |
| 118960364 | 2,15  |         |       |         | 3'-5' |    | 21 | 414 |
| 127288166 | 2,02  |         |       |         | 3'-5' |    | 29 | 520 |
| 128183585 | 2,62  |         |       |         | 3'-5' |    | 40 | 408 |
| 128365620 | 2,03  |         |       |         | 3'-5' |    | 49 | 380 |
| 131686101 | 1,615 |         |       |         | 3'-5' |    | 51 | 501 |
| 133773060 | 1,37  |         |       |         | 3'-5' |    | 53 | 288 |
| 135095464 | 1,83  |         |       |         | 3'-5' |    | 37 | 598 |
| 137192980 | 2,715 |         |       |         | 3'-5' |    | 37 | 421 |
| 139721908 | 1,675 | COL22A1 | 3'-5' | 1 47    | 3'-5' | no | 24 | 539 |
| 141874720 | 2,23  | PTK2    | 3'-5' | 1 12    | 3'-5' | no | 30 | 330 |
| 144272187 | 1,915 |         |       |         | 3'-5' |    | 36 | 591 |

| Ø                |          |       |         | 40    |      |       | 81 | 34,61 | 414,18 |
|------------------|----------|-------|---------|-------|------|-------|----|-------|--------|
|                  |          |       |         | 41    |      |       | 32 | 34,52 | 419,02 |
|                  |          |       |         | 81    |      |       | 49 | 34,68 | 410,65 |
| 9<br>174 results | 1114054  | 1,905 |         |       | 1    | 5'-3' |    | 50    | 453    |
|                  | 3403675  | 2,18  | RFX3    | 3'-5' | 1 2  | 5'-3' | ok | 45    | 370    |
|                  | 4350559  | 2,43  |         |       |      | 5'-3' |    | 29    | 438    |
|                  | 7506033  | 2,405 |         |       |      | 5'-3' |    | 27    | 423    |
|                  | 7827749  | 2,405 |         |       |      | 5'-3' |    | 28    | 433    |
|                  | 10502191 | 2,605 | PTPRD   | 3'-5' | 1 1  | 5'-3' | ok | 39    | 423    |
|                  | 11952627 | 2,515 |         |       |      | 5'-3' |    | 29    | 397    |
|                  | 12139800 | 2,085 |         |       |      | 5'-3' |    | 50    | 417    |
|                  | 14319338 | 1,835 |         |       |      | 5'-3' |    | 21    | 341    |
|                  | 14437575 | 2,32  |         |       |      | 5'-3' |    | 32    | 328    |
|                  | 14472618 | 2,05  |         |       |      | 5'-3' |    | 37    | 264    |
|                  | 15239459 | 1,405 | C9orf52 | 3'-5' | 1 2  | 5'-3' | ok | 17    | 523    |
|                  | 15441720 | 2,46  | SNAPC3  | 5'-3' | 1 6  | 5'-3' | no | 27    | 406    |
|                  | 15884578 | 2,235 | C9orf93 | 5'-3' | 1 24 | 5'-3' | no | 23    | 417    |
|                  | 17853901 | 1,77  |         |       |      | 5'-3' |    | 40    | 580    |
|                  | 18461554 | 2,625 |         |       |      | 5'-3' |    | 32    | 389    |
|                  | 20405622 | 2,65  | MLLT3   | 3'-5' | 1 4  | 5'-3' | ok | 35    | 364    |
|                  | 20566688 | 2,1   | MLLT3   | 3'-5' | 1 2  | 5'-3' | ok | 27    | 334    |
|                  | 21576296 | 1,945 |         |       |      | 5'-3' |    | 43    | 515    |
|                  | 22736652 | 2,73  |         |       |      | 5'-3' |    | 33    | 418    |
|                  | 23203999 | 1,61  |         |       |      | 5'-3' |    | 19    | 502    |
|                  | 25044494 | 2,025 |         |       |      | 5'-3' |    | 48    | 449    |
|                  | 27003224 | 2,09  | IFT74   | 5'-3' | 1 10 | 5'-3' | no | 21    | 392    |
|                  | 27788418 | 2,465 |         |       |      | 5'-3' |    | 40    | 441    |
|                  | 29016817 | 2,395 |         |       |      | 5'-3' |    | 27    | 393    |
|                  | 29145993 | 2,395 |         |       |      | 5'-3' |    | 29    | 373    |
|                  | 29216504 | 2,325 |         |       |      | 5'-3' |    | 41    | 359    |
|                  | 29369701 | 1,9   |         |       |      | 5'-3' |    | 30    | 554    |
|                  | 29467781 | 2,05  |         |       |      | 5'-3' |    | 19    | 404    |
|                  | 38953171 | 2,845 |         |       |      | 5'-3' |    | 35    | 403    |
|                  | 40060698 | 1,54  |         |       |      | 5'-3' |    | 25    | 242    |
|                  | 40369433 | 1,54  |         |       |      | 5'-3' |    | 25    | 242    |
|                  | 42776199 | 2,475 |         |       |      | 5'-3' |    | 32    | 359    |
|                  | 65442096 | 1,55  |         |       |      | 5'-3' |    | 25    | 244    |
|                  | 66677238 | 2,475 |         |       |      | 5'-3' |    | 32    | 359    |
|                  | 67055448 | 1,875 |         |       |      | 5'-3' |    | 16    | 419    |

|                  |              |             |              |               |              |    |           |            |
|------------------|--------------|-------------|--------------|---------------|--------------|----|-----------|------------|
| 69051667         | 2,525        |             |              |               | 5'-3'        |    | 41        | 399        |
| 69403589         | 1,875        |             |              |               | 5'-3'        |    | 16        | 419        |
| 69418347         | 2,525        |             |              |               | 5'-3'        |    | 41        | 399        |
| 69604014         | 1,875        |             |              |               | 5'-3'        |    | 16        | 419        |
| 69618816         | 2,525        |             |              |               | 5'-3'        |    | 41        | 399        |
| 71007276         | 2,405        | TJP2        | 5'-3'        | I 1           | 5'-3'        | no | 39        | 355        |
| 73089464         | 2,05         |             |              |               | 5'-3'        |    | 51        | 414        |
| 76213666         | 2,05         |             |              |               | 5'-3'        |    | 24        | 354        |
| 76799856         | 2,335        | C9orf41     | 3'-5'        | I 6           | 5'-3'        | ok | 29        | 361        |
| 77956407         | 2,66         | PCSK5       | 5'-3'        | I 10          | 5'-3'        | no | 34        | 376        |
| 78561015         | 2,18         | OC10012976: | 3'-5'        | I 6           | 5'-3'        |    | 31        | 310        |
| 79235495         | 2,16         | GNA14       | 3'-5'        | I 4 E 4       | 5'-3'        | ok | 43        | 346        |
| 79682341         | 2,47         | GNAQ        | 3'-5'        | I 2           | 5'-3'        | ok | 30        | 378        |
| 82078582         | 1,325        |             |              |               | 5'-3'        |    | 18        | 269        |
| 85688749         | 2,17         | KIF27       | 3'-5'        | E 10 I 9      | 5'-3'        | ok | 21        | 410        |
| 86747824         | 1,77         | NTRK2       | 5'-3'        | I 16          | 5'-3'        | no | 28        | 258        |
| 89696425         | 1,935        |             |              |               | 5'-3'        |    | 17        | 417        |
| 92060132         | 2,695        |             |              |               | 5'-3'        |    | 33        | 393        |
| 92999013         | 1,66         |             |              |               | 5'-3'        |    | 19        | 326        |
| 93882968         | 2,185        | SPTLC1      | 3'-5'        | E 4 I 3       | 5'-3'        | ok | 45        | 371        |
| 101527530        | 1,99         |             |              |               | 5'-3'        |    | 47        | 466        |
| <b>101599087</b> | <b>1,825</b> |             |              |               | <b>5'-3'</b> |    | <b>22</b> | <b>489</b> |
| 101604377        | 2,275        |             |              |               | 5'-3'        |    | 25        | 429        |
| 101911009        | 1,77         | INVS        | 5'-3'        | I 2           | 5'-3'        | no | 50        | 480        |
| 103608597        | 2,09         |             |              |               | 5'-3'        |    | 47        | 372        |
| 104698084        | 1,85         |             |              |               | 5'-3'        |    | 16        | 424        |
| 106059979        | 2,255        |             |              |               | 5'-3'        |    | 46        | 423        |
| 106535916        | 2,38         |             |              |               | 5'-3'        |    | 40        | 458        |
| 107421534        | 2,655        | FKTN        | 5'-3'        | I 8 E 9       | 5'-3'        | no | 31        | 413        |
| 111964648        | 1,91         | M2-AKAP2/AK | 5'-3'        | I 3/10        | 5'-3'        | no | 22        | 472        |
| 113478510        | 2,03         |             |              |               | 5'-3'        |    | 22        | 370        |
| 117472515        | 1,935        |             |              |               | 5'-3'        |    | 51        | 381        |
| 119377210        | 1,955        |             |              |               | 5'-3'        |    | 26        | 315        |
| 121510669        | 1,86         |             |              |               | 5'-3'        |    | 24        | 502        |
| <b>123107513</b> | <b>1,575</b> | <b>GSN</b>  | <b>5'-3'</b> | <b>I 3/10</b> | <b>5'-3'</b> | no | <b>26</b> | <b>239</b> |
| 126364429        | 2,225        | NR6A1       | 3'-5'        | I 2           | 5'-3'        | ok | 46        | 389        |
| 127049249        | 2,235        |             |              |               | 5'-3'        |    | 24        | 391        |
| 128951062        | 1,91         | RALGPS1     | 5'-3'        | I 8           | 5'-3'        | no | 21        | 356        |
| 134780906        | 2,67         | TSC1        | 3'-5'        | I 8           | 5'-3'        | ok | 39        | 408        |
| 137860831        | 2,45         | CAMSAP1     | 3'-5'        | I 5           | 5'-3'        | ok | 29        | 434        |

|                |             |                |              |             |              |    |           |            |
|----------------|-------------|----------------|--------------|-------------|--------------|----|-----------|------------|
| 139483822      | 2,54        | PNPLA7         | 3'-5'        | 1 24        | 5'-3'        | ok | 32        | 372        |
| <b>2079221</b> | <b>1,84</b> | <b>SMARCA2</b> | <b>5'-3'</b> | <b>1 19</b> | <b>3'-5'</b> | ok | <b>39</b> | <b>242</b> |
| 2917065        | 2,54        |                |              |             | 3'-5'        |    | 30        | 392        |
| 3554834        | 2,36        |                |              |             | 3'-5'        |    | 42        | 376        |
| 7569864        | 2,025       |                |              |             | 3'-5'        |    | 50        | 389        |
| 9664089        | 2,19        | PTPRD          | 3'-5'        | 1 6         | 3'-5'        | no | 38        | 516        |
| 10284392       | 1,89        | PTPRD          | 3'-5'        | 1 2         | 3'-5'        | no | 53        | 392        |
| 12358905       | 2,76        |                |              |             | 3'-5'        |    | 33        | 406        |
| 12982316       | 2,65        |                |              |             | 3'-5'        |    | 33        | 384        |
| 13173537       | 2,265       | MPDZ           | 3'-5'        | E 18   17   | 3'-5'        | no | 30        | 337        |
| 13629788       | 1,29        |                |              |             | 3'-5'        |    | 22        | 222        |
| 13769636       | 1,785       |                |              |             | 3'-5'        |    | 50        | 341        |
| 14033317       | 1,86        |                |              |             | 3'-5'        |    | 22        | 336        |
| 14842014       | 1,5         | FREM1          | 3'-5'        | 1 6         | 3'-5'        | no | 54        | 324        |
| 15378579       | 2,48        |                |              |             | 3'-5'        |    | 38        | 458        |
| 15761052       | 2,515       | C9orf93        | 5'-3'        | 1 18        | 3'-5'        | ok | 36        | 471        |
| 17048785       | 1,34        |                |              |             | 3'-5'        |    | 21        | 242        |
| 17172935       | 2,385       | CNTLN          | 5'-3'        | 1 2         | 3'-5'        | ok | 36        | 321        |
| 17381144       | 2,28        | CNTLN          | 5'-3'        | 1 10        | 3'-5'        | ok | 30        | 340        |
| 17622917       | 1,565       | SH3GL2         | 5'-3'        | 1 1         | 3'-5'        | ok | 24        | 561        |
| 20461373       | 2,495       | MLLT3          | 3'-5'        | 1 2         | 3'-5'        | no | 29        | 393        |
| 21317043       | 1,95        |                |              |             | 3'-5'        |    | 18        | 394        |
| 22433669       | 2,13        |                |              |             | 3'-5'        |    | 21        | 418        |
| 23210172       | 2,19        |                |              |             | 3'-5'        |    | 24        | 382        |
| 25070421       | 2,29        |                |              |             | 3'-5'        |    | 28        | 362        |
| 27279134       | 1,905       | C9orf11        | 3'-5'        | 1 6 E 6   5 | 3'-5'        | no | 19        | 375        |
| 27958209       | 2,12        | LINGO2         | 3'-5'        | 1 6         | 3'-5'        | no | 50        | 408        |
| 28634566       | 2,76        | LINGO2         | 3'-5'        | 1 2         | 3'-5'        | no | 36        | 396        |
| 28787541       | 2,29        |                |              |             | 3'-5'        |    | 25        | 392        |
| 28852489       | 2,16        |                |              |             | 3'-5'        |    | 26        | 462        |
| 28956026       | 2,235       |                |              |             | 3'-5'        |    | 47        | 401        |
| 29080422       | 2,44        |                |              |             | 3'-5'        |    | 27        | 416        |
| 31247255       | 1,975       |                |              |             | 3'-5'        |    | 17        | 409        |
| 31681105       | 2,47        |                |              |             | 3'-5'        |    | 28        | 420        |
| 35187421       | 1,475       | UNC13B         | 5'-3'        | 1 1         | 3'-5'        | ok | 52        | 519        |
| 37243512       | 1,735       | ZCCHC7         | 5'-3'        | 1 2         | 3'-5'        | ok | 16        | 371        |
| 39021404       | 1,555       |                |              |             | 3'-5'        |    | 25        | 245        |
| 42757008       | 2,525       |                |              |             | 3'-5'        |    | 41        | 399        |
| 42771810       | 1,875       |                |              |             | 3'-5'        |    | 16        | 419        |
| 47048421       | 1,55        |                |              |             | 3'-5'        |    | 25        | 244        |

|           |       |          |       |      |       |    |    |     |
|-----------|-------|----------|-------|------|-------|----|----|-----|
| 66658083  | 2,525 |          |       |      | 3'-5' |    | 41 | 399 |
| 66672849  | 1,875 |          |       |      | 3'-5' |    | 16 | 419 |
| 67051065  | 2,475 |          |       |      | 3'-5' |    | 32 | 359 |
| 69032524  | 2,475 |          |       |      | 3'-5' |    | 32 | 359 |
| 69399202  | 2,475 |          |       |      | 3'-5' |    | 32 | 359 |
| 69599625  | 2,475 |          |       |      | 3'-5' |    | 32 | 359 |
| 70323513  | 2,77  | PGM5     | 5'-3' | 1 10 | 3'-5' | ok | 36 | 398 |
| 71445743  | 2,365 | APBA1    | 3'-5' | 1 1  | 3'-5' | no | 25 | 411 |
| 71800377  | 1,555 |          |       |      | 3'-5' |    | 23 | 553 |
| 72859039  | 2,48  | TRPM3    | 3'-5' | 1 1  | 3'-5' | no | 39 | 448 |
| 75522739  | 1,85  |          |       |      | 3'-5' |    | 20 | 464 |
| 75853811  | 1,59  |          |       |      | 3'-5' |    | 43 | 586 |
| 76085311  | 2,41  |          |       |      | 3'-5' |    | 43 | 422 |
| 76141860  | 2,315 |          |       |      | 3'-5' |    | 25 | 421 |
| 76796997  | 2,345 | C9orf41  | 3'-5' | 1 6  | 3'-5' | no | 36 | 313 |
| 77786815  | 1,745 | PCSK5    | 5'-3' | 1 2  | 3'-5' | ok | 18 | 353 |
| 79804030  | 2,37  | GNAQ     | 3'-5' | 1 1  | 3'-5' | no | 45 | 410 |
| 81211046  | 1,955 |          |       |      | 3'-5' |    | 50 | 443 |
| 81964294  | 2,58  |          |       |      | 3'-5' |    | 32 | 438 |
| 87649957  | 2,165 |          |       |      | 3'-5' |    | 21 | 407 |
| 87695482  | 1,86  |          |       |      | 3'-5' |    | 52 | 376 |
| 88367805  | 2,02  |          |       |      | 3'-5' |    | 47 | 460 |
| 94182280  | 2,02  | CENPP    | 5'-3' | 1 5  | 3'-5' | ok | 30 | 288 |
| 97276074  | 2,27  | PTCH1    | 3'-5' | 1 12 | 3'-5' | no | 47 | 408 |
| 97682127  | 2,51  | C9orf102 | 5'-3' | 1 1  | 3'-5' | ok | 32 | 452 |
| 99041042  | 2,505 | KIAA1529 | 5'-3' | 1 1  | 3'-5' | ok | 30 | 385 |
| 99530799  | 2,61  |          |       |      | 3'-5' |    | 31 | 396 |
| 101040078 | 2,74  |          |       |      | 3'-5' |    | 33 | 416 |
| 101593942 | 1,915 |          |       |      | 3'-5' |    | 46 | 327 |
| 102805286 | 1,635 |          |       |      | 3'-5' |    | 19 | 497 |
| 103171245 | 1,77  | BAAT     | 3'-5' | 1 2  | 3'-5' | no | 52 | 358 |
| 103535572 | 2,69  | GRIN3A   | 3'-5' | 1 1  | 3'-5' | no | 37 | 426 |
| 103940080 | 2,17  |          |       |      | 3'-5' |    | 40 | 318 |
| 104987977 | 2,65  |          |       |      | 3'-5' |    | 39 | 404 |
| 105053525 | 2,69  |          |       |      | 3'-5' |    | 35 | 446 |
| 105535927 | 2,2   |          |       |      | 3'-5' |    | 26 | 364 |
| 105712931 | 1,56  |          |       |      | 3'-5' |    | 22 | 542 |
| 108092039 | 2,38  |          |       |      | 3'-5' |    | 26 | 400 |
| 108092118 | 2,375 |          |       |      | 3'-5' |    | 32 | 479 |
| 108793228 | 2,47  | ZNF462   | 5'-3' | 1 10 | 3'-5' | ok | 27 | 408 |

|             |                  |              |                |              |             |              |           |              |               |
|-------------|------------------|--------------|----------------|--------------|-------------|--------------|-----------|--------------|---------------|
|             | 109747481        | 2,715        |                |              |             | 3'-5'        |           | 32           | 407           |
|             | 111099694        | 2,245        | EPB41L4B       | 3'-5'        | 1 1         | 3'-5'        | no        | 40           | 333           |
|             | 111322215        | 2,445        |                |              |             | 3'-5'        |           | 36           | 333           |
|             | 112947515        | 2,1          |                |              |             | 3'-5'        |           | 39           | 524           |
|             | 113350228        | 1,42         | ZNF483         | 5'-3'        | 1 5         | 3'-5'        | ok        | 50           | 550           |
|             | 114094817        | 2,12         | ROD1           | 3'-5'        | 1 3         | 3'-5'        | no        | 20           | 410           |
|             | 116349297        | 2,53         |                |              |             | 3'-5'        |           | 31           | 380           |
|             | <b>116908622</b> | <b>2,63</b>  | <b>TNC</b>     | <b>3'-5'</b> | <b>1 1</b>  | <b>3'-5'</b> | no        | <b>31</b>    | <b>418</b>    |
|             | 117245745        | 2,415        |                |              |             | 3'-5'        |           | 26           | 407           |
|             | 117986996        | 1,845        | PAPPA          | 5'-3'        | 1 1         | 3'-5'        | ok        | 17           | 383           |
|             | 118468789        | 2,475        | ASTN2          | 3'-5'        | 1 15        | 3'-5'        | no        | 27           | 409           |
|             | 122998881        | 2,31         | RAB14          | 3'-5'        | 1 1         | 3'-5'        | no        | 27           | 442           |
|             | 124685152        | 2,605        | RC3H2          | 3'-5'        | 1 3 E 3 1 2 | 3'-5'        | no        | 34           | 365           |
|             | 126168022        | 2,61         | PSMB7          | 3'-5'        | 1 6         | 3'-5'        | no        | 40           | 412           |
|             | 127100717        | 1,835        | GAPVD1         | 5'-3'        | 1 1 E 2 1 2 | 3'-5'        | ok        | 54           | 391           |
|             | 128058838        | 2,585        |                |              |             | 3'-5'        |           | 40           | 417           |
|             | 135884861        | 1,815        |                |              |             | 3'-5'        |           | 30           | 247           |
|             | 139791199        | 1,5          | EHMT1          | 5'-3'        | 1 11        | 3'-5'        | ok        | 53           | 314           |
| <b>Ø</b>    |                  |              |                | <b>28</b>    |             |              | <b>64</b> | <b>32,49</b> | <b>395,47</b> |
|             |                  |              |                | <b>37</b>    |             |              | <b>33</b> | <b>34,14</b> | <b>390,89</b> |
|             |                  |              |                | <b>65</b>    |             |              | <b>31</b> | <b>31,5</b>  | <b>398,2</b>  |
| <b>10</b>   | 2012380          | 2,51         |                |              | 1           | 5'-3'        |           | 29           | 396           |
|             | 5155798          | 2,605        |                |              |             | 5'-3'        |           | 34           | 365           |
| 161 results | 6784500          | 1,895        |                |              |             | 5'-3'        |           | 21           | 465           |
|             | 7390019          | 2,695        | SFMBT2         | 3'-5'        | 1 4         | 5'-3'        | ok        | 34           | 383           |
|             | 7845687          | 1,8          | KIN            | 3'-5'        | E 10 1 9    | 5'-3'        | ok        | 42           | 554           |
|             | 10489122         | 1,9          |                |              |             | 5'-3'        |           | 17           | 424           |
|             | 10693280         | 2,355        |                |              |             | 5'-3'        |           | 32           | 483           |
|             | 10718685         | 1,915        |                |              |             | 5'-3'        |           | 16           | 407           |
|             | 11641840         | 1,84         |                |              |             | 5'-3'        |           | 51           | 456           |
|             | 12356991         | 1,425        |                |              |             | 5'-3'        |           | 49           | 559           |
|             | 13154135         | 1,41         |                |              |             | 5'-3'        |           | 18           | 532           |
|             | 13990885         | 2,61         | FRMD4A         | 3'-5'        | 1 2         | 5'-3'        | ok        | 39           | 396           |
|             | 16383844         | 2,155        |                |              |             | 5'-3'        |           | 40           | 315           |
|             | 21307974         | 2,275        | NEBL           | 3'-5'        | 1 3         | 5'-3'        | ok        | 47           | 409           |
|             | 21998722         | 2,285        | MLLT10         | 5'-3'        | 1 8         | 5'-3'        | no        | 45           | 391           |
|             | 22813198         | 1,735        |                |              |             | 5'-3'        |           | 51           | 341           |
|             | <b>22959275</b>  | <b>1,905</b> | <b>PIP5K2A</b> | <b>3'-5'</b> | <b>1 1</b>  | <b>5'-3'</b> | ok        | <b>17</b>    | <b>395</b>    |
|             | 24123668         | 2,315        | KIAA1217       | 5'-3'        | 1 1         | 5'-3'        | no        | 44           | 387           |

|          |       |             |       |       |       |    |    |     |
|----------|-------|-------------|-------|-------|-------|----|----|-----|
| 28459746 | 2,365 | MPP7        | 3'-5' | 18    | 5'-3' | ok | 28 | 441 |
| 29865066 | 2,34  | SVIL        | 3'-5' | 18/6  | 5'-3' | ok | 42 | 446 |
| 30673990 | 1,66  | PAPD1       | 3'-5' | 11    | 5'-3' | ok | 47 | 286 |
| 33822242 | 2,555 |             |       |       | 5'-3' |    | 38 | 375 |
| 36368859 | 1,875 |             |       |       | 5'-3' |    | 18 | 439 |
| 39092542 | 1,875 |             |       |       | 5'-3' |    | 16 | 419 |
| 39107317 | 2,55  |             |       |       | 5'-3' |    | 41 | 404 |
| 42036248 | 2,48  |             |       |       | 5'-3' |    | 32 | 360 |
| 42526240 | 1,885 |             |       |       | 5'-3' |    | 42 | 281 |
| 45048672 | 2,66  |             |       |       | 5'-3' |    | 36 | 376 |
| 46339057 | 1,91  |             |       |       | 5'-3' |    | 50 | 452 |
| 46486713 | 2,545 |             |       |       | 5'-3' |    | 32 | 445 |
| 46821130 | 1,91  |             |       |       | 5'-3' |    | 50 | 452 |
| 47033658 | 2,23  |             |       |       | 5'-3' |    | 43 | 458 |
| 53276279 | 1,475 | PRKG1       | 5'-3' | 14    | 5'-3' | no | 49 | 269 |
| 53925543 | 1,76  |             |       |       | 5'-3' |    | 17 | 366 |
| 54055714 | 1,83  |             |       |       | 5'-3' |    | 26 | 528 |
| 57165862 | 2,37  |             |       |       | 5'-3' |    | 26 | 398 |
| 57806165 | 2,42  |             |       |       | 5'-3' |    | 43 | 398 |
| 58326930 | 1,945 |             |       |       | 5'-3' |    | 17 | 415 |
| 59044911 | 1,92  |             |       |       | 5'-3' |    | 17 | 398 |
| 60146045 | 2,12  | BICC1       | 5'-3' | 13    | 5'-3' | no | 23 | 440 |
| 62296973 | 2,055 |             |       |       | 5'-3' |    | 31 | 533 |
| 64954974 | 2,66  | REEP3       | 5'-3' | 11    | 5'-3' | no | 34 | 376 |
| 68393366 | 2,175 | FNNA3/LRRTM | 3'-5' | 17/12 | 5'-3' | ok | 49 | 409 |
| 70741965 | 1,99  | HK1         | 5'-3' | 14    | 5'-3' | no | 24 | 342 |
| 70808592 | 2,795 | HK1         | 5'-3' | 18    | 5'-3' | no | 36 | 403 |
| 72689427 | 2,38  | UNC5B       | 5'-3' | 11    | 5'-3' | no | 36 | 498 |
| 74298651 | 1,43  | CCDC109A    | 5'-3' | 15    | 5'-3' | no | 19 | 280 |
| 75725879 | 1,98  | ADK         | 5'-3' | 13    | 5'-3' | no | 47 | 468 |
| 78162663 | 1,99  |             |       |       | 5'-3' |    | 18 | 416 |
| 81411382 | 1,98  |             |       |       | 5'-3' |    | 24 | 340 |
| 84082670 | 1,725 | NRG3        | 5'-3' | 11    | 5'-3' | no | 24 | 529 |
| 85605471 | 2,295 |             |       |       | 5'-3' |    | 24 | 415 |
| 87231906 | 2,4   |             |       |       | 5'-3' |    | 39 | 464 |
| 88479256 | 2,18  | LDB3        | 5'-3' | 112   | 5'-3' | no | 45 | 448 |
| 88921094 | 1,93  | FAM35A      | 5'-3' | 16    | 5'-3' | no | 50 | 448 |
| 90635199 | 2,745 | STAMPL1     |       | 11    | 5'-3' |    | 33 | 403 |
| 91274996 | 2,375 | SLC16A12    | 3'-5' | 12    | 5'-3' | ok | 26 | 399 |
| 93356200 | 1,84  |             |       |       | 5'-3' |    | 45 | 302 |

|           |       |          |       |            |       |    |    |     |
|-----------|-------|----------|-------|------------|-------|----|----|-----|
| 93535085  | 1,85  |          |       |            | 5'-3' |    | 16 | 424 |
| 100831953 | 2,33  | HPSE2    | 3'-5' | 13         | 5'-3' | ok | 45 | 400 |
| 101514834 | 2,42  |          |       |            | 5'-3' |    | 34 | 490 |
| 109222680 | 2,27  |          |       |            | 5'-3' |    | 25 | 430 |
| 109270658 | 1,66  |          |       |            | 5'-3' |    | 25 | 552 |
| 109592077 | 2,355 |          |       |            | 5'-3' |    | 35 | 513 |
| 112773594 | 1,185 |          |       |            | 5'-3' |    | 19 | 231 |
| 112812401 | 2,47  |          |       |            | 5'-3' |    | 41 | 430 |
| 114732212 | 2,25  | TCF7L2   | 5'-3' | 13         | 5'-3' | no | 41 | 344 |
| 116823873 | 2,37  |          |       |            | 5'-3' |    | 27 | 388 |
| 117358892 | 2,175 | ATRNL1   | 5'-3' | 126        | 5'-3' | no | 29 | 329 |
| 117558607 | 2,35  | ATRNL1   | 5'-3' | 127        | 5'-3' | no | 25 | 404 |
| 119573380 | 1,84  |          |       |            | 5'-3' |    | 16 | 426 |
| 127319428 | 2,425 |          |       |            | 5'-3' |    | 43 | 399 |
| 129403487 | 2,175 |          |       |            | 5'-3' |    | 34 | 539 |
| 274329    | 1,525 | ZMYND11  | 5'-3' | 16         | 3'-5' | ok | 45 | 239 |
| 1146605   | 1,59  | WDR37    | 5'-3' | 111        | 3'-5' | ok | 48 | 282 |
| 2971606   | 1,92  |          |       |            | 3'-5' |    | 22 | 348 |
| 4257587   | 1,79  |          |       |            | 3'-5' |    | 48 | 496 |
| 4390211   | 2,715 |          |       |            | 3'-5' |    | 38 | 407 |
| 4548344   | 1,57  |          |       |            | 3'-5' |    | 20 | 520 |
| 4816949   | 2,545 |          |       |            | 3'-5' |    | 41 | 415 |
| 4830641   | 2,565 |          |       |            | 3'-5' |    | 31 | 387 |
| 5831797   | 2,555 | C10orf18 | 5'-3' | E 17   17  | 3'-5' | ok | 35 | 473 |
| 6116917   | 2,095 | IL2RA    | 3'-5' | 11         | 3'-5' | no | 34 | 555 |
| 6904131   | 2,025 |          |       |            | 3'-5' |    | 19 | 419 |
| 8054578   | 2,225 | TAF3     | 5'-3' | 16         | 3'-5' | ok | 25 | 439 |
| 9582193   | 2,395 |          |       |            | 3'-5' |    | 44 | 415 |
| 10171791  | 2,49  |          |       |            | 3'-5' |    | 28 | 416 |
| 11055433  | 1,47  |          |       |            | 3'-5' |    | 25 | 590 |
| 11678392  | 2,095 |          |       |            | 3'-5' |    | 23 | 373 |
| 12081666  | 1,755 | UPF2     | 3'-5' | 17 E 7   6 | 3'-5' | no | 54 | 443 |
| 13552254  | 2,45  | C10orf30 | 3'-5' | 16         | 3'-5' | no | 43 | 414 |
| 14046566  | 2,135 | FRMD4A   | 3'-5' | 12         | 3'-5' | no | 34 | 547 |
| 15883491  | 2,465 | C10orf97 | 3'-5' | 110        | 3'-5' | no | 39 | 451 |
| 16049256  | 1,92  |          |       |            | 3'-5' |    | 43 | 298 |
| 16575241  | 2,655 | PTER     | 5'-3' | 14         | 3'-5' | ok | 32 | 395 |
| 17205560  | 2,645 | CUBN     | 3'-5' | 15 E 5   4 | 3'-5' | no | 32 | 425 |
| 18770286  | 2,145 | CACNB2   | 5'-3' | 12         | 3'-5' | ok | 23 | 383 |
| 20509415  | 2,38  | PLXDC2   | 5'-3' | 19         | 3'-5' | ok | 27 | 428 |



|          |       |          |       |           |       |    |    |     |
|----------|-------|----------|-------|-----------|-------|----|----|-----|
| 20635333 | 1,87  |          |       |           | 3'-5' |    | 52 | 378 |
| 26135704 | 1,72  |          |       |           | 3'-5' |    | 17 | 460 |
| 26698875 | 1,35  |          |       |           | 3'-5' |    | 50 | 564 |
| 27207584 | 2,24  |          |       |           | 3'-5' |    | 23 | 402 |
| 27866538 | 1,98  | RAB18    | 5'-3' | I 6 E 7   | 3'-5' | ok | 52 | 400 |
| 27968156 | 2,165 |          |       |           | 3'-5' |    | 49 | 411 |
| 28445435 | 2,17  | MPP7     | 3'-5' | I 13      | 3'-5' | no | 45 | 450 |
| 29145934 | 2,27  |          |       |           | 3'-5' |    | 45 | 430 |
| 30081319 | 2,73  |          |       |           | 3'-5' |    | 33 | 418 |
| 31176647 | 1,81  | ZNF438   | 3'-5' | I 6       | 3'-5' | no | 20 | 346 |
| 32147496 | 2,06  | ARHGAP12 | 3'-5' | I 12      | 3'-5' | no | 20 | 422 |
| 32419982 | 1,26  |          |       |           | 3'-5' |    | 50 | 236 |
| 32754818 | 2,015 |          |       |           | 3'-5' |    | 24 | 471 |
| 36072038 | 2,245 |          |       |           | 3'-5' |    | 23 | 415 |
| 42013103 | 2,55  |          |       |           | 3'-5' |    | 41 | 404 |
| 43318230 | 2,42  |          |       |           | 3'-5' |    | 39 | 358 |
| 43443241 | 2,51  |          |       |           | 3'-5' |    | 28 | 406 |
| 56001397 | 2,495 | PCDH15   | 3'-5' | I 2       | 3'-5' | no | 40 | 383 |
| 57069879 | 2,195 |          |       |           | 3'-5' |    | 22 | 403 |
| 57792504 | 2,555 |          |       |           | 3'-5' |    | 41 | 405 |
| 58746143 | 2,45  |          |       |           | 3'-5' |    | 29 | 434 |
| 58956887 | 2,47  |          |       |           | 3'-5' |    | 41 | 430 |
| 59526269 | 1,745 |          |       |           | 3'-5' |    | 16 | 373 |
| 60631266 | 2,6   | PHYHIPL  | 5'-3' | I 1       | 3'-5' | ok | 36 | 364 |
| 60864619 | 2,57  |          |       |           | 3'-5' |    | 30 | 420 |
| 65248141 | 1,56  |          |       |           | 3'-5' |    | 18 | 502 |
| 65979101 | 2,675 |          |       |           | 3'-5' |    | 35 | 449 |
| 67315942 | 2,04  |          |       |           | 3'-5' |    | 31 | 282 |
| 70334098 | 2,135 | DDX50    | 5'-3' | I 1       | 3'-5' | ok | 27 | 477 |
| 73177016 | 1,9   | CDH23    | 5'-3' | I 38      | 3'-5' | ok | 38 | 574 |
| 77184697 | 2,505 |          |       |           | 3'-5' |    | 41 | 423 |
| 77244716 | 2,245 | C10orf11 | 5'-3' | I 1       | 3'-5' | ok | 30 | 333 |
| 78314853 | 2,56  | KCNMA1   | 3'-5' | I 28/E 27 | 3'-5' | no | 31 | 386 |
| 79628906 | 2,515 |          |       |           | 3'-5' |    | 34 | 471 |
| 80829550 | 1,905 | C10orf56 | 3'-5' | I 2       | 3'-5' | no | 35 | 215 |
| 83073476 | 1,805 |          |       |           | 3'-5' |    | 17 | 375 |
| 84285651 | 1,71  | NRG3     | 5'-3' | I 2       | 3'-5' | ok | 43 | 562 |
| 84774059 | 2,505 |          |       |           | 3'-5' |    | 36 | 345 |
| 85689186 | 2,08  |          |       |           | 3'-5' |    | 28 | 320 |
| 87022516 | 1,96  |          |       |           | 3'-5' |    | 52 | 422 |

|           |       |        |       |      |       |    |    |     |
|-----------|-------|--------|-------|------|-------|----|----|-----|
| 92870581  | 2,14  |        |       |      | 3'-5' |    | 48 | 426 |
| 93440242  | 1,91  |        |       |      | 3'-5' |    | 46 | 326 |
| 97896042  | 1,545 | ZNF518 | 3'-5' | 13   | 3'-5' | no | 48 | 273 |
| 100923606 | 2,135 | HPSE2  | 3'-5' | 12   | 3'-5' | no | 47 | 381 |
| 104008940 | 2,185 | GBF1   | 5'-3' | 12   | 3'-5' | ok | 30 | 497 |
| 104630450 | 2,295 | AS3MT  | 5'-3' | 19   | 3'-5' | ok | 46 | 403 |
| 104762935 | 1,445 |        |       |      | 3'-5' |    | 17 | 515 |
| 106248931 | 2,615 |        |       |      | 3'-5' |    | 39 | 397 |
| 108127194 | 2,555 |        |       |      | 3'-5' |    | 33 | 365 |
| 108833039 | 1,98  | SORCS1 | 3'-5' | 11   | 3'-5' | no | 52 | 418 |
| 110558477 | 1,55  |        |       |      | 3'-5' |    | 54 | 484 |
| 114922411 | 2,33  |        |       |      | 3'-5' |    | 45 | 400 |
| 115989745 | 2,51  | VWA2   | 5'-3' | 11   | 3'-5' | ok | 34 | 346 |
| 117082957 | 1,775 | ATRNL1 | 5'-3' | 118  | 3'-5' | ok | 44 | 279 |
| 117419100 | 2     | ATRNL1 | 5'-3' | 126  | 3'-5' | ok | 25 | 334 |
| 119516861 | 2,29  |        |       |      | 3'-5' |    | 30 | 476 |
| 120784810 | 2,485 | EIF3A  | 3'-5' | E 22 | 3'-5' | no | 29 | 391 |
| 121300734 | 1,765 |        |       |      | 3'-5' |    | 54 | 441 |
| 123669486 | 2,48  | ATE1   | 3'-5' | 13   | 3'-5' | no | 28 | 400 |
| 126230823 | 1,675 | LHPP   | 5'-3' | 16   | 3'-5' | ok | 41 | 589 |
| 129646191 | 2,1   | PTPRE  | 5'-3' | 11   | 3'-5' | ok | 20 | 404 |
| 130706147 | 1,985 |        |       |      | 3'-5' |    | 52 | 401 |
| 131128728 | 2,325 |        |       |      | 3'-5' |    | 46 | 409 |

|   |  |  |           |  |  |           |              |               |
|---|--|--|-----------|--|--|-----------|--------------|---------------|
| Ø |  |  | <b>36</b> |  |  | <b>64</b> | <b>34,42</b> | <b>413,09</b> |
|   |  |  | <b>28</b> |  |  | <b>33</b> | <b>36,18</b> | <b>405,82</b> |
|   |  |  | <b>64</b> |  |  | <b>31</b> | <b>33,22</b> | <b>418,02</b> |

|             |          |       |         |       |       |       |    |     |     |
|-------------|----------|-------|---------|-------|-------|-------|----|-----|-----|
| 11          | 3329909  | 2,31  |         |       | 5'-3' |       | 24 | 406 |     |
|             | 4315334  | 2,72  |         |       | 5'-3' |       | 34 | 430 |     |
| 174 results | 4871137  | 2,525 |         |       | 5'-3' |       | 42 | 409 |     |
|             | 5476227  | 2,345 |         |       | 5'-3' |       | 43 | 435 |     |
|             | 10069570 | 2,425 | SBF2    | 3'-5' | 12    | 5'-3' | ok | 28  | 429 |
|             | 11546522 | 1,81  | GALNTL4 | 3'-5' | 11    | 5'-3' | ok | 16  | 386 |
|             | 15332396 | 2,14  |         |       | 5'-3' |       | 22 | 426 |     |
|             | 15830553 | 2,555 |         |       | 5'-3' |       | 41 | 405 |     |
|             | 20939375 | 2,625 | NELL1   | 5'-3' | 112   | 5'-3' | no | 40  | 409 |
|             | 21010443 | 2,455 | NELL1   | 5'-3' | 112   | 5'-3' | no | 27  | 413 |
|             | 21139083 | 1,595 | NELL1   | 5'-3' | 113   | 5'-3' | no | 26  | 243 |
|             | 21384594 | 2,58  | NELL1   | 5'-3' | 115   | 5'-3' | no | 33  | 370 |
|             | 22065457 | 1,87  |         |       | 5'-3' |       | 30 | 560 |     |

|          |       |          |       |           |       |    |    |     |
|----------|-------|----------|-------|-----------|-------|----|----|-----|
| 22513734 | 2,665 |          |       |           | 5'-3' |    | 38 | 397 |
| 24305369 | 2,49  |          |       |           | 5'-3' |    | 30 | 382 |
| 24679949 | 2,395 | LUZP2    | 5'-3' | 1 1       | 5'-3' | no | 42 | 435 |
| 26304748 | 2,01  |          |       |           | 5'-3' |    | 38 | 552 |
| 26701545 | 2,675 |          |       |           | 5'-3' |    | 38 | 419 |
| 27592847 | 2,825 |          |       |           | 5'-3' |    | 36 | 409 |
| 29341283 | 2,505 |          |       |           | 5'-3' |    | 30 | 385 |
| 30219087 | 1,995 |          |       |           | 5'-3' |    | 35 | 585 |
| 30548365 | 2,245 | MPPED2   | 3'-5' | 1 1       | 5'-3' | ok | 42 | 465 |
| 31171334 | 2,35  |          |       |           | 5'-3' |    | 33 | 324 |
| 32662646 | 1,47  | CCDC73   | 3'-5' | 1 6       | 5'-3' | ok | 19 | 530 |
| 33015529 | 2,11  |          |       |           | 5'-3' |    | 50 | 406 |
| 34751384 | 2,415 |          |       |           | 5'-3' |    | 42 | 387 |
| 37447167 | 1,605 |          |       |           | 5'-3' |    | 20 | 513 |
| 37600576 | 2,765 |          |       |           | 5'-3' |    | 33 | 411 |
| 37932775 | 2,435 |          |       |           | 5'-3' |    | 42 | 391 |
| 38320924 | 2,455 |          |       |           | 5'-3' |    | 31 | 365 |
| 39711398 | 1,955 |          |       |           | 5'-3' |    | 19 | 385 |
| 39839042 | 2,79  |          |       |           | 5'-3' |    | 35 | 426 |
| 40147628 | 2,79  | LRRC4C   | 3'-5' | 1 1       | 5'-3' | ok | 34 | 416 |
| 41285432 | 2,695 |          |       |           | 5'-3' |    | 34 | 383 |
| 42997611 | 1,98  |          |       |           | 5'-3' |    | 40 | 538 |
| 43225801 | 2,615 |          |       |           | 5'-3' |    | 40 | 407 |
| 43668894 | 2,135 | HSD17B12 | 5'-3' | 1 1       | 5'-3' | no | 42 | 331 |
| 46478614 | 2,58  | FLJ20294 | 3'-5' | 1 10      | 5'-3' | ok | 30 | 400 |
| 46532225 | 1,67  | FLJ20294 | 3'-5' | 1 1       | 5'-3' | ok | 25 | 550 |
| 49329528 | 1,57  |          |       |           | 5'-3' |    | 21 | 288 |
| 55572608 | 2,41  |          |       |           | 5'-3' |    | 31 | 356 |
| 56279375 | 2,02  |          |       |           | 5'-3' |    | 47 | 460 |
| 58380849 | 2,375 |          |       |           | 5'-3' |    | 28 | 439 |
| 68408609 | 2,06  |          |       |           | 5'-3' |    | 22 | 376 |
| 73070719 | 2,39  | RAB6A    | 3'-5' | 1 6       | 5'-3' | ok | 36 | 322 |
| 74385900 | 1,835 | NEU3     | 5'-3' | 1 2       | 5'-3' | no | 21 | 341 |
| 76276445 | 2,54  | PHCA     | 5'-3' | 1 1       | 5'-3' | no | 38 | 372 |
| 76632382 | 2,505 | GDPD4    | 3'-5' | E 12   11 | 5'-3' | ok | 35 | 483 |
| 76701228 | 2,71  |          |       |           | 5'-3' |    | 37 | 422 |
| 78235375 | 2,045 |          |       |           | 5'-3' |    | 51 | 403 |
| 79110190 | 2,525 |          |       |           | 5'-3' |    | 42 | 409 |
| 84039503 | 2,03  | DLG2     | 3'-5' | 1 1       | 5'-3' | ok | 51 | 400 |
| 84292767 | 2,44  | DLG2     | 3'-5' | 1 1       | 5'-3' | ok | 43 | 416 |

|           |       |           |       |       |       |    |    |     |
|-----------|-------|-----------|-------|-------|-------|----|----|-----|
| 85037995  | 2,145 | TMEM126A  | 5'-3' | 1     | 5'-3' | no | 46 | 373 |
| 85054268  | 1,89  |           |       |       | 5'-3' |    | 21 | 466 |
| 85358601  | 1,64  | PICALM    | 3'-5' | 19    | 5'-3' | ok | 46 | 546 |
| 86407014  | 2,665 |           |       |       | 5'-3' |    | 39 | 407 |
| 87499587  | 2,165 | RAB38     | 3'-5' | 2     | 5'-3' | ok | 25 | 367 |
| 88757903  | 2,14  | NOX4      | 3'-5' | 11    | 5'-3' | ok | 40 | 506 |
| 91438756  | 1,965 |           |       |       | 5'-3' |    | 27 | 511 |
| 91565846  | 2,49  |           |       |       | 5'-3' |    | 36 | 342 |
| 92923661  | 2,62  |           |       |       | 5'-3' |    | 39 | 398 |
| 93257673  | 2,05  |           |       |       | 5'-3' |    | 50 | 394 |
| 94451893  | 2,21  |           |       |       | 5'-3' |    | 41 | 336 |
| 94513530  | 1,97  |           |       |       | 5'-3' |    | 46 | 480 |
| 96525490  | 1,86  |           |       |       | 5'-3' |    | 17 | 432 |
| 96582809  | 2,1   |           |       |       | 5'-3' |    | 29 | 504 |
| 98732831  | 2,04  | CNTN5     | 5'-3' | 2     | 5'-3' | no | 46 | 466 |
| 101787296 | 2,72  | TMEM123   | 3'-5' | 1     | 5'-3' | ok | 37 | 398 |
| 107773323 | 1,365 | C11orf65  | 3'-5' | 7     | 5'-3' | ok | 48 | 237 |
| 108097131 | 2,37  | DDX10     | 5'-3' | 12    | 5'-3' | no | 45 | 408 |
| 109352143 | 2,36  |           |       |       | 5'-3' |    | 33 | 326 |
| 110556747 | 1,475 |           |       |       | 5'-3' |    | 19 | 529 |
| 110712225 | 2,495 |           |       |       | 5'-3' |    | 35 | 333 |
| 110890983 | 2,41  | FLJ46266  | 5'-3' | 1 1 1 | 5'-3' | no | 44 | 412 |
| 114728073 | 1,69  | CADM1     | 3'-5' | 1     | 5'-3' | ok | 16 | 362 |
| 114835794 | 2,005 | CADM1     | 3'-5' | 1     | 5'-3' | ok | 51 | 395 |
| 115354267 | 2,35  |           |       |       | 5'-3' |    | 31 | 344 |
| 117312795 | 2,08  |           |       |       | 5'-3' |    | 22 | 380 |
| 120343863 | 1,96  | GRIK4     | 5'-3' | 17    | 5'-3' | no | 42 | 522 |
| 121790045 | 2,28  |           |       |       | 5'-3' |    | 46 | 400 |
| 124475413 | 1,62  | LOC219854 | 3'-5' | 4     | 5'-3' |    | 25 | 560 |
| 125402697 | 2,215 | CDON      | 3'-5' | 1     | 5'-3' | ok | 48 | 411 |
| 127757166 | 2,025 |           |       |       | 5'-3' |    | 23 | 459 |
| 128637073 | 2,575 |           |       |       | 5'-3' |    | 29 | 409 |
| 129020800 | 1,97  |           |       |       | 5'-3' |    | 39 | 550 |
| 134369689 | 1,965 |           |       |       | 5'-3' |    | 20 | 377 |
| 2431776   | 2,66  | KCNQ1     | 5'-3' | 1     | 3'-5' | ok | 31 | 412 |
| 4212189   | 2,275 |           |       |       | 3'-5' |    | 25 | 429 |
| 4257606   | 2,27  |           |       |       | 3'-5' |    | 25 | 430 |
| 4645043   | 1,97  |           |       |       | 3'-5' |    | 21 | 368 |
| 5282947   | 1,705 |           |       |       | 3'-5' |    | 16 | 365 |
| 5682856   | 2,715 | TRIM22    | 5'-3' | 4     | 3'-5' | ok | 38 | 407 |

|                 |              |              |       |                |              |    |           |            |
|-----------------|--------------|--------------|-------|----------------|--------------|----|-----------|------------|
| 6873737         | 2,22         |              |       |                | 3'-5'        |    | 33        | 520        |
| 7483238         | 2,55         | OLFML1       | 5'-3' | I 2            | 3'-5'        | ok | 38        | 374        |
| 10161439        | 2,185        | SBF2         | 3'-5' | I 2            | 3'-5'        | no | 22        | 417        |
| 14223005        | 2,445        | SPON1        | 5'-3' | I 7            | 3'-5'        | ok | 40        | 373        |
| 14771531        | 2,51         | PDE3B        | 5'-3' | I 4            | 3'-5'        | ok | 33        | 356        |
| 14836924        | 2,47         | PDE3B        | 5'-3' | I 12 E 12 I 13 | 3'-5'        | ok | 34        | 338        |
| 21208261        | 1,205        | NELL1        | 5'-3' | I 14           | 3'-5'        | ok | 53        | 255        |
| 21292276        | 2,295        | NELL1        | 5'-3' | I 14           | 3'-5'        | ok | 29        | 465        |
| 21757869        | 1,89         |              |       |                | 3'-5'        |    | 20        | 456        |
| 22760198        | 2,055        | GAS2         | 5'-3' | I 6            | 3'-5'        | ok | 45        | 345        |
| 23931002        | 2,53         |              |       |                | 3'-5'        |    | 41        | 418        |
| 24517534        | 2,68         | LUZP2        | 5'-3' | I 1            | 3'-5'        | ok | 35        | 370        |
| <b>24614496</b> | <b>2,555</b> | <b>LUZP2</b> | 5'-3' | <b>I 1</b>     | <b>3'-5'</b> | ok | <b>33</b> | <b>453</b> |
| 25690694        | 2,765        |              |       |                | 3'-5'        |    | 37        | 411        |
| 26669797        | 2,205        | SLC5A12      | 3'-5' | E 9            | 3'-5'        | no | 24        | 385        |
| 27859482        | 2,525        |              |       |                | 3'-5'        |    | 42        | 409        |
| 28936711        | 2,355        |              |       |                | 3'-5'        |    | 45        | 413        |
| 29771340        | 2,8          |              |       |                | 3'-5'        |    | 36        | 404        |
| 31237007        | 1,755        |              |       |                | 3'-5'        |    | 23        | 305        |
| 31565196        | 2,28         | ELP4         | 5'-3' | I 3            | 3'-5'        | ok | 44        | 438        |
| 31592354        | 2,465        | ELP4         | 5'-3' | I 5            | 3'-5'        | ok | 27        | 407        |
| 34786532        | 1,505        |              |       |                | 3'-5'        |    | 25        | 583        |
| 36134119        | 1,985        | LDLRAD3      | 5'-3' | I 4            | 3'-5'        | ok | 52        | 401        |
| 36978710        | 2,35         |              |       |                | 3'-5'        |    | 27        | 434        |
| 38150838        | 1,835        |              |       |                | 3'-5'        |    | 30        | 567        |
| 40103175        | 2,75         | LRRC4C       | 3'-5' | I 1            | 3'-5'        | no | 34        | 424        |
| 40744117        | 2,87         |              |       |                | 3'-5'        |    | 35        | 408        |
| 41350610        | 1,87         |              |       |                | 3'-5'        |    | 20        | 358        |
| 42161126        | 1,645        |              |       |                | 3'-5'        |    | 42        | 233        |
| 42759271        | 2,585        |              |       |                | 3'-5'        |    | 36        | 361        |
| 43953990        | 2,255        |              |       |                | 3'-5'        |    | 45        | 385        |
| 49300566        | 2,145        |              |       |                | 3'-5'        |    | 40        | 313        |
| 49898685        | 1,665        |              |       |                | 3'-5'        |    | 54        | 357        |
| 56914919        | 2,025        |              |       |                | 3'-5'        |    | 19        | 419        |
| 58672095        | 1,925        | FAM111A      | 5'-3' | I 2            | 3'-5'        | ok | 51        | 439        |
| 58968138        | 2,14         | OR5A1        | 5'-3' | E 1            | 3'-5'        | ok | 49        | 402        |
| 59003402        | 2,2          |              |       |                | 3'-5'        |    | 22        | 414        |
| 61800938        | 2,07         |              |       |                | 3'-5'        |    | 25        | 470        |
| 62290610        | 2,375        | POLR2G       | 5'-3' | E 8            | 3'-5'        | ok | 38        | 479        |
| 67763485        | 2,645        |              |       |                | 3'-5'        |    | 36        | 445        |

|                  |             |                |       |             |              |    |           |            |
|------------------|-------------|----------------|-------|-------------|--------------|----|-----------|------------|
| 69511891         | 2,38        |                |       |             | 3'-5'        |    | 36        | 320        |
| 71737045         | 2,2         | CLPB           | 3'-5' | 1 6         | 3'-5'        | no | 26        | 454        |
| 81168726         | 1,53        |                |       |             | 3'-5'        |    | 54        | 488        |
| 81744979         | 1,225       |                |       |             | 3'-5'        |    | 16        | 549        |
| 83260625         | 2,255       | DLG2           | 3'-5' | 1 11        | 3'-5'        | no | 45        | 433        |
| 83270991         | 2,81        | DLG2           | 3'-5' | 1 10        | 3'-5'        | no | 36        | 412        |
| 84813552         | 2,275       |                |       |             | 3'-5'        |    | 45        | 429        |
| 86781319         | 2,665       |                |       |             | 3'-5'        |    | 32        | 397        |
| 86871203         | 2,215       |                |       |             | 3'-5'        |    | 33        | 521        |
| 87224089         | 2,025       |                |       |             | 3'-5'        |    | 18        | 409        |
| 88017168         | 2,755       | GRM5           | 3'-5' | 1 3         | 3'-5'        | no | 37        | 413        |
| 88727037         | 1,715       | NOX4           | 3'-5' | 1 13        | 3'-5'        | no | 21        | 317        |
| 88848335         | 2,12        | NOX4           | 3'-5' | 1 2         | 3'-5'        | no | 21        | 420        |
| 90282439         | 2,095       |                |       |             | 3'-5'        |    | 22        | 383        |
| 90760326         | 2,285       |                |       |             | 3'-5'        |    | 45        | 427        |
| 91952156         | 2,15        | FAT3           | 5'-3' | 1 3         | 3'-5'        | ok | 47        | 434        |
| 92042982         | 2,765       | FAT3           | 5'-3' | 1 3         | 3'-5'        | ok | 34        | 421        |
| 92950947         | 2,2         |                |       |             | 3'-5'        |    | 48        | 404        |
| 95776063         | 2,41        |                |       |             | 3'-5'        |    | 28        | 386        |
| 97735652         | 2,695       |                |       |             | 3'-5'        |    | 33        | 425        |
| 99349980         | 2,205       | CNTN5          | 5'-3' | 1 8         | 3'-5'        | ok | 28        | 473        |
| 100831265        | 2,4         | TRPC6          | 3'-5' | 1 10        | 3'-5'        | no | 30        | 364        |
| 100883719        | 1,955       | TRPC6          | 3'-5' | 1 1         | 3'-5'        | no | 48        | 355        |
| 102711970        | 1,96        | DYNC2H1        | 5'-3' | 1 83        | 3'-5'        | ok | 51        | 432        |
| <b>102783264</b> | <b>2,51</b> | <b>DYNC2H1</b> | 5'-3' | <b>1 85</b> | <b>3'-5'</b> | ok | <b>41</b> | <b>422</b> |
| 106297558        | 2,39        | GUCY1A2        | 3'-5' | 1 4         | 3'-5'        | no | 39        | 466        |
| 106566330        | 1,835       |                |       |             | 3'-5'        |    | 23        | 321        |
| 107445288        | 2,29        | CUL5           | 5'-3' | 1 7         | 3'-5'        | ok | 26        | 436        |
| 110952961        | 2,575       |                |       |             | 3'-5'        |    | 40        | 419        |
| 111126057        | 2,745       | PPP2R1B        | 3'-5' | 1 10        | 3'-5'        | no | 36        | 393        |
| 114035897        | 2,24        |                |       |             | 3'-5'        |    | 46        | 426        |
| 116463235        | 2,105       | KIAA0999       | 3'-5' | 1 1         | 3'-5'        | no | 26        | 473        |
| 121112109        | 1,92        |                |       |             | 3'-5'        |    | 17        | 420        |
| 122310374        | 2,455       | C11orf63       | 5'-3' | E 5         | 3'-5'        | ok | 28        | 423        |
| 122451569        | 2,26        | ASAM           | 3'-5' | 1 5         | 3'-5'        | no | 46        | 396        |
| 123470503        | 1,64        |                |       |             | 3'-5'        |    | 44        | 566        |
| 123913738        | 1,625       |                |       |             | 3'-5'        |    | 54        | 349        |
| 124351331        | 2,05        | CCDC15         | 5'-3' | 1 5         | 3'-5'        | ok | 47        | 454        |
| 127422345        | 2,39        |                |       |             | 3'-5'        |    | 37        | 486        |
| 127790377        | 1,4         |                |       |             | 3'-5'        |    | 50        | 554        |

|             |                 |              |                |              |            |              |           |              |               |
|-------------|-----------------|--------------|----------------|--------------|------------|--------------|-----------|--------------|---------------|
|             | 128616647       | 2,26         |                |              |            | 3'-5'        |           | 23           | 406           |
| ∅           |                 |              |                | <b>38</b>    |            |              | <b>72</b> | <b>34,68</b> | <b>416,27</b> |
|             |                 |              |                | <b>35</b>    |            |              | <b>28</b> | <b>36,3</b>  | <b>411,03</b> |
|             |                 |              |                | <b>73</b>    |            |              | <b>44</b> | <b>33,51</b> | <b>420,06</b> |
| <b>12</b>   | 6181630         | 1,425        | CD9            | 5'-3'        | I 1        | 5'-3'        | no        | 22           | 569           |
|             | 14688045        | 2,295        | GUCY2C         | 3'-5'        | I 16       | 5'-3'        | ok        | 34           | 303           |
| 153 results | 17337414        | 2,75         |                |              |            | 5'-3'        |           | 37           | 414           |
|             | 17979668        | 2,425        |                |              |            | 5'-3'        |           | 30           | 449           |
|             | 21764219        | 2,48         |                |              |            | 5'-3'        |           | 31           | 448           |
|             | 22029995        | 2,685        |                |              |            | 5'-3'        |           | 36           | 437           |
|             | 23635338        | 2,5          | SOX5           | 3'-5'        | I 9        | 5'-3'        | ok        | 39           | 444           |
|             | 23948721        | 2,485        | SOX5           | 3'-5'        | I 1        | 5'-3'        | ok        | 32           | 361           |
|             | 24501483        | 2,09         | SOX5           | 3'-5'        | I 1        | 5'-3'        | ok        | 50           | 416           |
|             | 24798096        | 2,225        |                |              |            | 5'-3'        |           | 46           | 429           |
|             | 25389891        | 2,705        |                |              |            | 5'-3'        |           | 33           | 395           |
|             | 27303878        | 2,08         | STK38L         | 5'-3'        | I 1        | 5'-3'        | no        | 21           | 428           |
|             | 27310675        | 1,875        | STK38L         | 5'-3'        | I 1        | 5'-3'        | no        | 16           | 419           |
|             | 28059586        | 1,805        |                |              |            | 5'-3'        |           | 20           | 345           |
|             | 28497890        | 2,75         | CCDC91         | 5'-3'        | I 10       | 5'-3'        | no        | 33           | 414           |
|             | 29276691        | 1,81         | MLSTD1         | 5'-3'        | I 1        | 5'-3'        | no        | 42           | 552           |
|             | 29901073        | 1,595        |                |              |            | 5'-3'        |           | 44           | 243           |
|             | 31840613        | 1,9          |                |              |            | 5'-3'        |           | 25           | 314           |
|             | 33156131        | 2,815        |                |              |            | 5'-3'        |           | 36           | 411           |
|             | 33613138        | 1,445        |                |              |            | 5'-3'        |           | 17           | 303           |
|             | 38077522        | 2,495        | KIF21A         | 3'-5'        | I 1        | 5'-3'        | ok        | 38           | 455           |
|             | <b>44911163</b> | <b>2,055</b> | <b>SLC38A1</b> | <b>3'-5'</b> | <b>I 3</b> | <b>5'-3'</b> | ok        | <b>49</b>    | <b>385</b>    |
|             | <b>44911163</b> | <b>2,055</b> | <b>SLC38A1</b> | <b>3'-5'</b> | <b>I 3</b> | <b>5'-3'</b> | ok        | <b>49</b>    | <b>385</b>    |
|             | 48070786        | 2,67         | SPATS2         | 5'-3'        | I 2        | 5'-3'        | no        | 37           | 388           |
|             | 50386094        | 1,975        | SCN8A          | 5'-3'        | I 10 E 11  | 5'-3'        | no        | 38           | 259           |
|             | 50691984        | 1,885        | GRASP          | 3'-5'        | I 4        | 5'-3'        | ok        | 22           | 477           |
|             | 55747473        | 2,47         | KIAA0286       | 3'-5'        | I 3        | 5'-3'        | ok        | 31           | 368           |
|             | 56477384        | 2,32         | TSMF           | 5'-3'        | E 7        | 5'-3'        | no        | 40           | 348           |
|             | 56827707        | 2,24         |                |              |            | 5'-3'        |           | 24           | 426           |
|             | 60479526        | 1,815        | FAM19A2        | 3'-5'        | I 2        | 5'-3'        | ok        | 29           | 561           |
|             | 60585433        | 2,245        | FAM19A2        | 3'-5'        | I 1        | 5'-3'        | ok        | 23           | 415           |
|             | 60874017        | 2,795        |                |              |            | 5'-3'        |           | 36           | 403           |
|             | 62276035        | 2,33         | DPY19L2        | 3'-5'        | E 15 I 14  | 5'-3'        | ok        | 45           | 400           |
|             | 64476309        | 1,79         |                |              |            | 5'-3'        |           | 50           | 342           |
|             | 65753192        | 1,815        |                |              |            | 5'-3'        |           | 19           | 461           |

|                 |             |                 |              |             |              |           |           |            |
|-----------------|-------------|-----------------|--------------|-------------|--------------|-----------|-----------|------------|
| 65940132        | 2,39        |                 |              |             | 5'-3'        |           | 26        | 402        |
| 66431383        | 2,235       |                 |              |             | 5'-3'        |           | 24        | 427        |
| 69122620        | 2,61        |                 |              |             | 5'-3'        |           | 40        | 406        |
| 74084115        | 2,705       | GLIPR1L2        | 5'-3'        | 1 1         | 5'-3'        | no        | 36        | 433        |
| 74547874        | 2,245       |                 |              |             | 5'-3'        |           | 23        | 403        |
| 75425119        | 1,625       | OSBPL8          | 3'-5'        | 1 1         | 5'-3'        | ok        | 24        | 269        |
| 76127758        | 2,09        |                 |              |             | 5'-3'        |           | 24        | 456        |
| 76487215        | 2,65        |                 |              |             | 5'-3'        |           | 39        | 414        |
| 76823283        | 2,18        | NAV3            | 5'-3'        | 1 1         | 5'-3'        | no        | 24        | 438        |
| 76920706        | 2,605       | NAV3            | 5'-3'        | 1 7         | 5'-3'        | no        | 32        | 433        |
| <b>78788370</b> | <b>2,64</b> | <b>PPP1R12A</b> | <b>3'-5'</b> | <b>1 2</b>  | <b>5'-3'</b> | <b>ok</b> | <b>36</b> | <b>372</b> |
| 79787764        | 2,34        | LIN7A           | 3'-5'        | 1 2         | 5'-3'        | ok        | 37        | 496        |
| 81330552        | 2,87        | C12orf26        | 5'-3'        | 1 5         | 5'-3'        | no        | 35        | 410        |
| 85307554        | 2,135       | MGAT4C          | 3'-5'        | 1 3         | 5'-3'        | ok        | 24        | 371        |
| 85307791        | 2,78        | MGAT4C          | 3'-5'        | 1 3         | 5'-3'        | ok        | 36        | 418        |
| 85915320        | 1,965       |                 |              |             | 5'-3'        |           | 38        | 257        |
| 87651615        | 2,25        |                 |              |             | 5'-3'        |           | 44        | 374        |
| 88878910        | 2,7         |                 |              |             | 5'-3'        |           | 34        | 384        |
| 89770848        | 2,34        |                 |              |             | 5'-3'        |           | 29        | 456        |
| 90718531        | 1,72        |                 |              |             | 5'-3'        |           | 20        | 490        |
| 91743436        | 2,3         | EEA1            | 3'-5'        | 1 13        | 5'-3'        | ok        | 46        | 414        |
| 92825509        | 1,825       |                 |              |             | 5'-3'        |           | 18        | 369        |
| 93999553        | 1,765       | FGD6            | 3'-5'        | 1 20        | 5'-3'        | ok        | 21        | 491        |
| 94067585        | 2,54        | FGD6            | 3'-5'        | 1 5         | 5'-3'        | ok        | 34        | 352        |
| 95125090        | 1,95        | ELK3            | 5'-3'        | 1 1         | 5'-3'        | no        | 49        | 364        |
| 95386217        | 2,345       |                 |              |             | 5'-3'        |           | 41        | 455        |
| 97111120        | 2,095       |                 |              |             | 5'-3'        |           | 20        | 403        |
| 98668839        | 1,855       | ANKS1B          | 3'-5'        | 1 8         | 5'-3'        | ok        | 16        | 395        |
| 101677886       | 2,48        |                 |              |             | 5'-3'        |           | 29        | 428        |
| 102175224       | 1,525       |                 |              |             | 5'-3'        |           | 23        | 259        |
| 102177489       | 2,095       |                 |              |             | 5'-3'        |           | 27        | 485        |
| 110441907       | 1,56        | ATXN2           | 3'-5'        | 1 8 E 8 1 7 | 5'-3'        | ok        | 51        | 306        |
| 116570807       | 2,305       | KSR2            | 3'-5'        | 1 3         | 5'-3'        | ok        | 27        | 443        |
| 122377090       | 2,42        | SBNO1           | 3'-5'        | 1 12        | 5'-3'        | ok        | 26        | 408        |
| 123055866       | 2,46        | ZNF664          | 5'-3'        | 1 4         | 5'-3'        | no        | 33        | 472        |
| 124631268       | 2,57        | TMEM132B        | 5'-3'        | 1 4         | 5'-3'        | no        | 36        | 460        |
| 128223564       | 2,465       | TMEM132D        | 3'-5'        | 1 5         | 5'-3'        | ok        | 27        | 407        |
| 128633751       | 1,585       | TMEM132D        | 3'-5'        | 1 2         | 5'-3'        | ok        | 24        | 261        |
| 938274          | 2,64        |                 |              |             | 3'-5'        |           | 36        | 372        |
| 1140811         | 2,675       | ERC1            | 5'-3'        | 1 7         | 3'-5'        | ok        | 35        | 449        |



|                 |              |             |              |             |              |    |           |            |
|-----------------|--------------|-------------|--------------|-------------|--------------|----|-----------|------------|
| 1831889         | 2,665        | CACNA2D4    | 3'-5'        | 1 23        | 3'-5'        | no | 37        | 387        |
| 8115875         | 2,005        |             |              |             | 3'-5'        |    | 20        | 433        |
| 9965834         | 1,86         |             |              |             | 3'-5'        |    | 54        | 422        |
| 11039967        | 2,69         | TAS2R49     | 3'-5'        | E 1         | 3'-5'        | no | 36        | 382        |
| 13928903        | 2,72         | GRIN2B      | 3'-5'        | 1 1         | 3'-5'        | no | 38        | 408        |
| 14117205        | 1,645        |             |              |             | 3'-5'        |    | 46        | 545        |
| 16059572        | 2,725        | DERA        | 5'-3'        | 1 6         | 3'-5'        | ok | 35        | 379        |
| 16321247        | 1,965        |             |              |             | 3'-5'        |    | 17        | 411        |
| 17513121        | 1,825        |             |              |             | 3'-5'        |    | 17        | 439        |
| 17720212        | 1,53         |             |              |             | 3'-5'        |    | 16        | 330        |
| 20125063        | 2,715        |             |              |             | 3'-5'        |    | 36        | 431        |
| 21484098        | 2,28         | PYROXD1     | 5'-3'        | 1 1 E 2 1 2 | 3'-5'        | ok | 45        | 428        |
| 25070177        | 1,885        |             |              |             | 3'-5'        |    | 54        | 401        |
| <b>25138816</b> | <b>2,185</b> | <b>LRMP</b> | <b>5'-3'</b> | <b>1 13</b> | <b>3'-5'</b> | ok | <b>35</b> | <b>547</b> |
| 26206887        | 1,97         |             |              |             | 3'-5'        |    | 17        | 408        |
| 27034200        | 1,19         | TM7SF3      | 3'-5'        | 1 6 E 6     | 3'-5'        | no | 53        | 252        |
| 27658421        | 2,555        | PPFIBP1     | 5'-3'        | 1 2         | 3'-5'        | ok | 39        | 433        |
| 28223185        | 1,77         |             |              |             | 3'-5'        |    | 22        | 318        |
| 30351948        | 2,155        |             |              |             | 3'-5'        |    | 22        | 395        |
| 32375546        | 2,035        | BICD1       | 5'-3'        | 1 5         | 3'-5'        | ok | 34        | 251        |
| 33479244        | 2,31         | SYT10       | 3'-5'        | 1 1         | 3'-5'        | no | 25        | 422        |
| 37732402        | 2,67         |             |              |             | 3'-5'        |    | 35        | 368        |
| 38173304        | 2,145        |             |              |             | 3'-5'        |    | 39        | 515        |
| 43056205        | 2,755        | TMEM117     | 5'-3'        | 1 6 E 7 1 7 | 3'-5'        | ok | 34        | 395        |
| 43482980        | 2,03         | NELL2       | 3'-5'        | 1 4         | 3'-5'        | no | 26        | 330        |
| 46063094        | 1,84         |             |              |             | 3'-5'        |    | 50        | 352        |
| 49542543        | 2,215        | TMPRSS12    | 5'-3'        | 1 3         | 3'-5'        | ok | 43        | 357        |
| 50952888        | 2,065        |             |              |             | 3'-5'        |    | 48        | 441        |
| 51264560        | 1,715        |             |              |             | 3'-5'        |    | 48        | 511        |
| 55270001        | 1,345        |             |              |             | 3'-5'        |    | 24        | 605        |
| 55933542        | 2,505        | R3HDM2      | 3'-5'        | E 14        | 3'-5'        | no | 36        | 473        |
| 56137229        | 1,915        | INHBE       | 5'-3'        | E 2         | 3'-5'        | ok | 53        | 421        |
| 58342321        | 2,135        |             |              |             | 3'-5'        |    | 21        | 417        |
| 58876232        | 2,2          |             |              |             | 3'-5'        |    | 44        | 454        |
| 59020546        | 2,6          |             |              |             | 3'-5'        |    | 38        | 384        |
| 62517254        | 2,6          |             |              |             | 3'-5'        |    | 31        | 394        |
| 63092509        | 1,6          | XPOT        | 5'-3'        | 1 2         | 3'-5'        | ok | 43        | 234        |
| 65200449        | 2,83         | GRIP1       | 3'-5'        | 1 5         | 3'-5'        | no | 35        | 400        |
| 66211966        | 2,19         |             |              |             | 3'-5'        |    | 47        | 426        |
| 68268826        | 1,27         | CCT2        | 5'-3'        | 1 6         | 3'-5'        | ok | 17        | 550        |

|           |       |              |           |             |       |           |              |               |
|-----------|-------|--------------|-----------|-------------|-------|-----------|--------------|---------------|
| 72797913  | 2,265 |              |           |             | 3'-5' |           | 35           | 531           |
| 73047255  | 2,65  |              |           |             | 3'-5' |           | 37           | 384           |
| 73261884  | 2,135 |              |           |             | 3'-5' |           | 47           | 381           |
| 76758739  | 1,88  | NAV3         | 5'-3'     | 1 1         | 3'-5' | ok        | 24           | 498           |
| 77515220  | 2,745 |              |           |             | 3'-5' |           | 33           | 403           |
| 79238197  | 2,02  |              |           |             | 3'-5' |           | 34           | 248           |
| 79828175  | 2,23  | _IN7A/MALS-1 | 3'-5'     | 1 1         | 3'-5' | no        | 25           | 438           |
| 79837663  | 2,395 | _IN7A/MALS-1 | 3'-5'     | 1 1         | 3'-5' | no        | 33           | 333           |
| 81456960  | 1,765 |              |           |             | 3'-5' |           | 40           | 237           |
| 82379437  | 2,46  |              |           |             | 3'-5' |           | 27           | 406           |
| 85106264  | 2,06  | MGAT4C       | 3'-5'     | 1 4         | 3'-5' | no        | 49           | 386           |
| 85293297  | 2,625 | MGAT4C       | 3'-5'     | 1 3         | 3'-5' | no        | 35           | 459           |
| 86925312  | 2,355 | C12orf50     | 3'-5'     | 1 3         | 3'-5' | no        | 45           | 413           |
| 87841884  | 2,1   |              |           |             | 3'-5' |           | 44           | 344           |
| 87940855  | 2,215 |              |           |             | 3'-5' |           | 23           | 397           |
| 88121111  | 1,345 |              |           |             | 3'-5' |           | 19           | 555           |
| 90713408  | 2,45  |              |           |             | 3'-5' |           | 30           | 444           |
| 94096341  | 2,63  | FGD6         | 3'-5'     | 1 2         | 3'-5' | no        | 37           | 380           |
| 96951434  | 1,66  |              |           |             | 3'-5' |           | 46           | 542           |
| 96993007  | 2,12  |              |           |             | 3'-5' |           | 46           | 368           |
| 97171455  | 1,77  |              |           |             | 3'-5' |           | 24           | 520           |
| 98519284  | 1,94  | ANKS1B       | 3'-5'     | 1 9         | 3'-5' | no        | 17           | 416           |
| 99309736  | 1,815 | SLC17AB      |           | 1 3         | 3'-5' |           | 19           | 461           |
| 99867629  | 2,48  | TMEM16D      | 5'-3'     | 1 4         | 3'-5' | ok        | 31           | 448           |
| 101675690 | 1,59  |              |           |             | 3'-5' |           | 16           | 342           |
| 103233364 | 1,935 | TXNRD1       | 5'-3'     | 1 4 E 5 1 5 | 3'-5' | ok        | 38           | 251           |
| 105000862 | 2,095 | NUAK1        | 3'-5'     | 1           | 3'-5' | no        | 38           | 535           |
| 110485183 | 2,6   | ATXN2        | 3'-5'     | 1 1         | 3'-5' | no        | 38           | 434           |
| 110499186 | 1,825 | ATXN2        | 3'-5'     | 1 1         | 3'-5' | no        | 19           | 459           |
| 110869197 | 2,47  | TMEM116      | 3'-5'     | 1 6         | 3'-5' | no        | 35           | 490           |
| 115403020 | 1,905 |              |           |             | 3'-5' |           | 54           | 405           |
| 115753189 | 2,725 | TMEM118      | 5'-3'     | 1 8         | 3'-5' | ok        | 32           | 409           |
| 117237398 | 2,12  | TAOK3        | 3'-5'     | 1 1         | 3'-5' | no        | 22           | 430           |
| 117377283 | 2,145 |              |           |             | 3'-5' |           | 28           | 485           |
| 118310384 | 2,555 | CCDC60       | 5'-3'     | 1 1         | 3'-5' | ok        | 40           | 423           |
| 122356033 | 2,12  | SBNO1        | 3'-5'     | 1 27        | 3'-5' | no        | 27           | 338           |
| 124896431 | 2,43  |              |           |             | 3'-5' |           | 37           | 340           |
| 125716791 | 2,475 |              |           |             | 3'-5' |           | 31           | 369           |
| 127251702 | 2,6   |              |           |             | 3'-5' |           | 40           | 414           |
| <b>Ø</b>  |       |              | <b>31</b> |             |       | <b>78</b> | <b>33,16</b> | <b>408,16</b> |

47 36 33,56 408,64  
78 42 32,75 407,67

| 13          |          |       |          |       |                |       |    |    |     |
|-------------|----------|-------|----------|-------|----------------|-------|----|----|-----|
| 159 results | 19039961 | 2,165 |          |       | 1              | 5'-3' |    | 49 | 411 |
|             | 25284336 | 2,325 | ATP8A2   | 5'-3' | 1 20           | 5'-3' | no | 39 | 339 |
|             | 28229398 | 2,505 |          |       |                | 5'-3' |    | 30 | 433 |
|             | 28345620 | 2,325 |          |       |                | 5'-3' |    | 24 | 409 |
|             | 28550604 | 2,41  | KIAA0774 | 5'-3' | 1 2            | 5'-3' | no | 27 | 422 |
|             | 28903091 | 1,98  | KIAA0774 | 5'-3' | 1 6            | 5'-3' | no | 46 | 478 |
|             | 31613642 | 2,095 | FRY      | 5'-3' | 1 11           | 5'-3' | no | 28 | 495 |
|             | 32558183 | 1,61  |          |       |                | 5'-3' |    | 16 | 346 |
|             | 32814284 | 2,005 |          |       |                | 5'-3' |    | 50 | 385 |
|             | 34515995 | 2,615 | NBEA     | 5'-3' | 1 3            | 5'-3' | no | 36 | 451 |
|             | 34553166 | 2,7   | NBEA     | 5'-3' | 1 11           | 5'-3' | no | 38 | 414 |
|             | 34588008 | 2,395 | NBEA     | 5'-3' | 1 14           | 5'-3' | no | 36 | 495 |
|             | 35694758 | 2,22  |          |       |                | 5'-3' |    | 45 | 378 |
|             | 36519667 | 2,33  | FAM48A   | 3'-5' | E4   4 E 5   5 | 5'-3' | ok | 26 | 428 |
|             | 37200600 | 1,65  | TRPC4    | 3'-5' | 1 3            | 5'-3' | ok | 16 | 464 |
|             | 38182647 | 2,32  | FREM2    | 5'-3' | 1 2            | 5'-3' | no | 46 | 408 |
|             | 38302761 | 2,355 | FREM2    | 5'-3' | 1 6            | 5'-3' | no | 26 | 423 |
|             | 39012730 | 1,865 | LHFP     | 3'-5' | 1 2            | 5'-3' | ok | 47 | 491 |
|             | 39154530 | 2,37  | COG6     | 5'-3' | 1 8            | 5'-3' | no | 45 | 408 |
|             | 39313506 | 2,405 |          |       |                | 5'-3' |    | 39 | 463 |
|             | 40228145 | 2,11  | MRPS31   | 3'-5' | 1 4            | 5'-3' | ok | 49 | 396 |
|             | 40392734 | 2,525 |          |       |                | 5'-3' |    | 30 | 389 |
|             | 41533698 | 1,73  | DGKH     | 5'-3' | 1 1            | 5'-3' | no | 40 | 588 |
|             | 43039261 | 1,385 | ENOX1    | 5'-3' | 1 1            | 5'-3' | no | 17 | 291 |
|             | 43220254 | 2,75  |          |       |                | 5'-3' |    | 35 | 384 |
|             | 46445984 | 2,19  |          |       |                | 5'-3' |    | 25 | 446 |
|             | 46876193 | 2,445 |          |       |                | 5'-3' |    | 27 | 403 |
|             | 47033105 | 1,855 |          |       |                | 5'-3' |    | 16 | 395 |
|             | 48643240 | 2,71  | FNDC3A   | 5'-3' | 1 10           | 5'-3' | no | 38 | 412 |
|             | 49085581 | 1,97  |          |       |                | 5'-3' |    | 18 | 420 |
|             | 49953549 | 2,165 |          |       |                | 5'-3' |    | 47 | 387 |
|             | 50836245 | 2,18  | INTS6    | 3'-5' | E 19           | 5'-3' | ok | 45 | 370 |
|             | 53942382 | 1,45  |          |       |                | 5'-3' |    | 21 | 554 |
|             | 55135433 | 2,385 |          |       |                | 5'-3' |    | 44 | 417 |
|             | 55188824 | 2,235 |          |       |                | 5'-3' |    | 39 | 497 |
|             | 55957275 | 2,46  |          |       |                | 5'-3' |    | 30 | 376 |
|             | 57170938 | 2,285 | PCDH17   | 3'-5' | 1 3            | 5'-3' | ok | 46 | 401 |

|                 |              |              |              |             |              |    |           |            |
|-----------------|--------------|--------------|--------------|-------------|--------------|----|-----------|------------|
| 57397130        | 2,28         |              |              |             | 5'-3'        |    | 43        | 370        |
| 58431115        | 2,43         |              |              |             | 5'-3'        |    | 32        | 468        |
| 60111610        | 2,375        |              |              |             | 5'-3'        |    | 26        | 399        |
| 60662100        | 2,56         |              |              |             | 5'-3'        |    | 30        | 396        |
| 63159794        | 2,44         |              |              |             | 5'-3'        |    | 42        | 392        |
| 63242058        | 2            |              |              |             | 5'-3'        |    | 31        | 544        |
| 65077293        | 2,405        |              |              |             | 5'-3'        |    | 40        | 365        |
| 65735124        | 2,11         |              |              |             | 5'-3'        |    | 40        | 512        |
| 66273453        | 2,57         | PCDH9        | 5'-3'        | 1 2         | 5'-3'        | no | 32        | 378        |
| <b>66410839</b> | <b>2,1</b>   | <b>PCDH9</b> | <b>5'-3'</b> | <b>1 2</b>  | <b>5'-3'</b> | no | <b>49</b> | <b>394</b> |
| 70748575        | 2,685        |              |              |             | 5'-3'        |    | 33        | 391        |
| 70959948        | 2,355        | DACH1        | 3'-5'        | 1 3         | 5'-3'        | ok | 29        | 365        |
| 72298776        | 1,995        | C13orf24     | 5'-3'        | 1 6 E 7 1 7 | 5'-3'        | no | 23        | 353        |
| 76742427        | 1,855        | MYCBP2       | 3'-5'        | E 6 1 7     | 5'-3'        | ok | 28        | 543        |
| 77302166        | 2,615        |              |              |             | 5'-3'        |    | 33        | 441        |
| 77806897        | 2,24         |              |              |             | 5'-3'        |    | 24        | 426        |
| 77859531        | 1,96         |              |              |             | 5'-3'        |    | 17        | 406        |
| 78323474        | 2,48         |              |              |             | 5'-3'        |    | 28        | 400        |
| 79700248        | 2,55         |              |              |             | 5'-3'        |    | 33        | 454        |
| 80673190        | 2,775        |              |              |             | 5'-3'        |    | 36        | 399        |
| 81122659        | 1,915        |              |              |             | 5'-3'        |    | 25        | 317        |
| 81494287        | 2,525        |              |              |             | 5'-3'        |    | 35        | 479        |
| 83283692        | 2,23         |              |              |             | 5'-3'        |    | 26        | 370        |
| 84332372        | 2,765        |              |              |             | 5'-3'        |    | 34        | 397        |
| 84464727        | 2,425        |              |              |             | 5'-3'        |    | 40        | 449        |
| 85748026        | 2,29         |              |              |             | 5'-3'        |    | 46        | 402        |
| 86855494        | 2,235        |              |              |             | 5'-3'        |    | 45        | 437        |
| 88688162        | 2,115        |              |              |             | 5'-3'        |    | 50        | 407        |
| 89519362        | 2,39         |              |              |             | 5'-3'        |    | 26        | 402        |
| 90231362        | 2,065        |              |              |             | 5'-3'        |    | 48        | 377        |
| 92517080        | 2,6          |              |              |             | 5'-3'        |    | 30        | 404        |
| 92553946        | 2,235        |              |              |             | 5'-3'        |    | 47        | 401        |
| <b>93551145</b> | <b>1,515</b> | <b>GPC6</b>  | <b>5'-3'</b> | <b>1 4</b>  | <b>5'-3'</b> | no | <b>22</b> | <b>267</b> |
| 94294083        | 2,7          |              |              |             | 5'-3'        |    | 32        | 414        |
| 97069353        | 1,48         |              |              |             | 5'-3'        |    | 18        | 300        |
| 97153896        | 2,265        |              |              |             | 5'-3'        |    | 43        | 451        |
| 100384993       | 1,91         |              |              |             | 5'-3'        |    | 18        | 432        |
| 103844164       | 2,335        |              |              |             | 5'-3'        |    | 42        | 371        |
| 104423475       | 1,795        |              |              |             | 5'-3'        |    | 48        | 495        |
| 104520586       | 1,98         |              |              |             | 5'-3'        |    | 48        | 360        |

|           |       |         |       |      |       |    |    |     |
|-----------|-------|---------|-------|------|-------|----|----|-----|
| 105404657 | 2,06  |         |       |      | 5'-3' |    | 29 | 512 |
| 108819275 | 1,965 |         |       |      | 5'-3' |    | 48 | 357 |
| 110601572 | 1,71  | ARHGEF7 | 5'-3' | 1 1  | 5'-3' | no | 18 | 472 |
| 20075069  | 2,78  | IFT88   | 5'-3' | 1 12 | 3'-5' | ok | 36 | 418 |
| 21109718  | 1,95  |         |       |      | 3'-5' |    | 23 | 344 |
| 21736650  | 2,615 |         |       |      | 3'-5' |    | 33 | 377 |
| 23463881  | 2,22  |         |       |      | 3'-5' |    | 39 | 500 |
| 25793043  | 2,61  | CDK8    | 5'-3' | 1 1  | 3'-5' | ok | 38 | 386 |
| 26783094  | 2,15  |         |       |      | 3'-5' |    | 36 | 274 |
| 29913984  | 1,915 |         |       |      | 3'-5' |    | 21 | 461 |
| 31020273  | 1,855 |         |       |      | 3'-5' |    | 47 | 325 |
| 33401355  | 2,295 | RFC3    | 5'-3' | 1 8  | 3'-5' | ok | 44 | 435 |
| 33974732  | 1,82  |         |       |      | 3'-5' |    | 16 | 430 |
| 34339196  | 1,76  |         |       |      | 3'-5' |    | 48 | 502 |
| 37638777  | 2     |         |       |      | 3'-5' |    | 35 | 234 |
| 37665147  | 1,625 |         |       |      | 3'-5' |    | 45 | 559 |
| 37923914  | 2,38  |         |       |      | 3'-5' |    | 28 | 380 |
| 39938845  | 2,035 |         |       |      | 3'-5' |    | 33 | 557 |
| 40631420  | 2,47  |         |       |      | 3'-5' |    | 29 | 430 |
| 42036796  | 1,99  |         |       |      | 3'-5' |    | 43 | 312 |
| 42542587  | 2,045 | DNAJC15 | 5'-3' | 1 3  | 3'-5' | ok | 40 | 293 |
| 46888451  | 2,27  |         |       |      | 3'-5' |    | 43 | 368 |
| 47096899  | 1,8   |         |       |      | 3'-5' |    | 28 | 264 |
| 50155143  | 1,75  |         |       |      | 3'-5' |    | 19 | 344 |
| 53857709  | 2,065 |         |       |      | 3'-5' |    | 51 | 411 |
| 53919194  | 2,42  |         |       |      | 3'-5' |    | 27 | 398 |
| 57135153  | 2,49  | PCDH17  | 5'-3' | 1 1  | 3'-5' | ok | 28 | 416 |
| 57709945  | 1,92  |         |       |      | 3'-5' |    | 21 | 358 |
| 58107586  | 2,145 |         |       |      | 3'-5' |    | 21 | 403 |
| 59042953  | 1,88  |         |       |      | 3'-5' |    | 50 | 458 |
| 59177314  | 2,37  | DIAPH3  | 3'-5' | 1 20 | 3'-5' | no | 30 | 358 |
| 59550984  | 2,105 | DIAPH3  | 3'-5' | 1 4  | 3'-5' | no | 45 | 355 |
| 60170899  | 1,965 |         |       |      | 3'-5' |    | 27 | 511 |
| 60750801  | 2,175 |         |       |      | 3'-5' |    | 24 | 379 |
| 60909717  | 2,52  |         |       |      | 3'-5' |    | 32 | 368 |
| 60985532  | 2,325 |         |       |      | 3'-5' |    | 25 | 399 |
| 61032387  | 2,105 |         |       |      | 3'-5' |    | 25 | 355 |
| 61324505  | 1,965 |         |       |      | 3'-5' |    | 17 | 407 |
| 61486048  | 2,65  |         |       |      | 3'-5' |    | 39 | 414 |
| 62263810  | 2,72  |         |       |      | 3'-5' |    | 32 | 408 |

|           |       |        |       |      |       |    |    |     |
|-----------|-------|--------|-------|------|-------|----|----|-----|
| 63207261  | 2,185 |        |       |      | 3'-5' |    | 22 | 417 |
| 64524342  | 2,03  |        |       |      | 3'-5' |    | 19 | 418 |
| 65831448  | 2,685 | PCDH9  | 3'-5' | 1 3  | 3'-5' | no | 38 | 417 |
| 65993148  | 2,58  | PCDH9  | 3'-5' | 1 3  | 3'-5' | no | 40 | 400 |
| 66724167  | 1,78  |        |       |      | 3'-5' |    | 49 | 488 |
| 67898604  | 2,545 |        |       |      | 3'-5' |    | 30 | 425 |
| 69706396  | 2,455 |        |       |      | 3'-5' |    | 30 | 375 |
| 70053666  | 1,06  |        |       |      | 3'-5' |    | 18 | 216 |
| 73999222  | 2,19  |        |       |      | 3'-5' |    | 48 | 416 |
| 74429330  | 2,56  |        |       |      | 3'-5' |    | 35 | 472 |
| 75019844  | 2,295 |        |       |      | 3'-5' |    | 31 | 485 |
| 75379447  | 1,915 |        |       |      | 3'-5' |    | 28 | 287 |
| 75516500  | 1,885 |        |       |      | 3'-5' |    | 23 | 487 |
| 78345799  | 2,1   |        |       |      | 3'-5' |    | 45 | 354 |
| 78825784  | 1,95  | RBM26  | 3'-5' | 1 13 | 3'-5' | no | 23 | 344 |
| 80561563  | 2,45  |        |       |      | 3'-5' |    | 42 | 424 |
| 81060260  | 2,645 |        |       |      | 3'-5' |    | 39 | 415 |
| 81062056  | 1,995 |        |       |      | 3'-5' |    | 18 | 403 |
| 81787219  | 1,53  |        |       |      | 3'-5' |    | 16 | 488 |
| 83505836  | 2,57  |        |       |      | 3'-5' |    | 38 | 378 |
| 84039234  | 1,765 |        |       |      | 3'-5' |    | 29 | 571 |
| 84465083  | 1,945 |        |       |      | 3'-5' |    | 53 | 403 |
| 86466066  | 2,27  |        |       |      | 3'-5' |    | 42 | 460 |
| 86563276  | 1,89  |        |       |      | 3'-5' |    | 49 | 466 |
| 88391179  | 2,18  |        |       |      | 3'-5' |    | 38 | 300 |
| 88698919  | 1,91  |        |       |      | 3'-5' |    | 54 | 412 |
| 89162661  | 2,64  |        |       |      | 3'-5' |    | 33 | 382 |
| 89507842  | 1,96  |        |       |      | 3'-5' |    | 18 | 396 |
| 90281920  | 1,78  |        |       |      | 3'-5' |    | 51 | 350 |
| 93326643  | 2,345 | GPC6   | 5'-3' | 1 3  | 3'-5' | ok | 25 | 415 |
| 93595447  | 2,315 | GPC6   | 5'-3' | 1 4  | 3'-5' | ok | 37 | 317 |
| 93943224  | 2,18  |        |       |      | 3'-5' |    | 26 | 458 |
| 95526781  | 1,865 |        |       |      | 3'-5' |    | 51 | 451 |
| 96248327  | 1,95  | HS6ST3 | 5'-3' | 1 1  | 3'-5' | ok | 30 | 544 |
| 96471223  | 2,38  |        |       |      | 3'-5' |    | 29 | 370 |
| 97296706  | 1,955 |        |       |      | 3'-5' |    | 20 | 375 |
| 97891318  | 2,365 | FARP1  | 5'-3' | 1 24 | 3'-5' | ok | 30 | 357 |
| 100881366 | 2,455 |        |       |      | 3'-5' |    | 28 | 395 |
| 104881247 | 1,95  |        |       |      | 3'-5' |    | 36 | 234 |
| 105016705 | 1,905 |        |       |      | 3'-5' |    | 50 | 365 |

|             |           |       |          |           |   |       |    |           |               |
|-------------|-----------|-------|----------|-----------|---|-------|----|-----------|---------------|
|             | 106321271 | 2,025 |          |           |   | 3'-5' |    | 24        | 469           |
|             | 109015371 | 1,535 |          |           |   | 3'-5' |    | 43        | 221           |
| <b>Ø</b>    |           |       |          | <b>27</b> |   |       |    | <b>40</b> | <b>33,89</b>  |
|             |           |       |          | <b>13</b> |   |       |    | <b>23</b> | <b>34,4</b>   |
|             |           |       |          | <b>40</b> |   |       |    | <b>17</b> | <b>33,72</b>  |
|             |           |       |          |           |   |       |    |           | <b>407,21</b> |
|             |           |       |          |           |   |       |    |           | <b>410,03</b> |
|             |           |       |          |           |   |       |    |           | <b>406,27</b> |
| <b>14</b>   | 18232873  | 2,455 |          |           |   | 5'-3' |    | 43        | 413           |
|             | 19158149  | 2,18  |          |           |   | 5'-3' |    | 41        | 488           |
| 120 results | 25496578  | 2,21  |          |           |   | 5'-3' |    | 46        | 432           |
|             | 25903668  | 2,445 |          |           |   | 5'-3' |    | 29        | 435           |
|             | 27456008  | 2,105 |          |           |   | 5'-3' |    | 47        | 443           |
|             | 28330675  | 1,71  |          |           |   | 5'-3' |    | 28        | 246           |
|             | 29194395  | 2,22  | PRKD1    | 3'-5'     | 4 | 5'-3' | ok | 42        | 348           |
|             | 29435727  | 2,29  | PRKD1    | 3'-5'     | 1 | 5'-3' | ok | 44        | 436           |
|             | 30012325  | 1,855 |          |           |   | 5'-3' |    | 22        | 335           |
|             | 33849276  | 2,28  |          |           |   | 5'-3' |    | 24        | 418           |
|             | 36390313  | 2,8   | SLC25A21 | 3'-5'     | 2 | 5'-3' | ok | 36        | 414           |
|             | 39807855  | 2,045 |          |           |   | 5'-3' |    | 42        | 313           |
|             | 40381046  | 2,435 |          |           |   | 5'-3' |    | 34        | 331           |
|             | 41365445  | 2,72  | LRFN5    | 5'-3'     | 2 | 5'-3' | no | 38        | 408           |
|             | 41373495  | 1,58  | LRFN5    | 5'-3'     | 2 | 5'-3' | no | 20        | 518           |
|             | 41419386  | 2,835 | LRFN5    | 5'-3'     | 2 | 5'-3' | no | 35        | 417           |
|             | 41694820  | 2,185 |          |           |   | 5'-3' |    | 48        | 417           |
|             | 41833414  | 1,68  |          |           |   | 5'-3' |    | 21        | 508           |
|             | 43154297  | 2,26  |          |           |   | 5'-3' |    | 45        | 432           |
|             | 44006250  | 2,29  |          |           |   | 5'-3' |    | 45        | 392           |
|             | 45830677  | 2,37  |          |           |   | 5'-3' |    | 32        | 338           |
|             | 46205912  | 2,2   |          |           |   | 5'-3' |    | 47        | 424           |
|             | 46270769  | 1,715 |          |           |   | 5'-3' |    | 48        | 511           |
|             | 48366700  | 2,16  |          |           |   | 5'-3' |    | 23        | 386           |
|             | 50504509  | 2,765 |          |           |   | 5'-3' |    | 35        | 431           |
|             | 50714858  | 1,855 |          |           |   | 5'-3' |    | 18        | 443           |
|             | 53062066  | 1,78  |          |           |   | 5'-3' |    | 38        | 598           |
|             | 53075840  | 2,465 |          |           |   | 5'-3' |    | 39        | 451           |
|             | 53870000  | 1,835 |          |           |   | 5'-3' |    | 48        | 487           |
|             | 56944242  | 2,08  | NAT12    | 5'-3'     | 4 | 5'-3' | no | 45        | 350           |
|             | 59048226  | 2,45  |          |           |   | 5'-3' |    | 29        | 434           |
|             | 59175730  | 2,68  | RTN1     | 3'-5'     | 3 | 5'-3' | ok | 32        | 400           |
|             | 61301273  | 2,385 | SNAPC1   | 5'-3'     | 1 | 5'-3' | no | 27        | 391           |
|             | 61655352  | 2,07  |          |           |   | 5'-3' |    | 28        | 318           |

|                 |              |             |              |                |              |    |           |            |
|-----------------|--------------|-------------|--------------|----------------|--------------|----|-----------|------------|
| 61692714        | 2,655        |             |              |                | 5'-3'        |    | 35        | 365        |
| 62863773        | 1,805        |             |              |                | 5'-3'        |    | 29        | 255        |
| <b>65277499</b> | <b>1,625</b> | <b>FUT8</b> | <b>5'-3'</b> | <b>I 10</b>    | <b>5'-3'</b> | no | <b>51</b> | <b>319</b> |
| 65381909        | 2,49         |             |              |                | 5'-3'        |    | 28        | 416        |
| 72610867        | 2,39         | RBM25       | 5'-3'        | I 2            | 5'-3'        | no | 30        | 456        |
| 77580155        | 2,39         |             |              |                | 5'-3'        |    | 27        | 426        |
| 78510092        | 2,645        | NRXN3       | 5'-3'        | I 11           | 5'-3'        | no | 35        | 363        |
| 78660780        | 2,52         | NRXN3       | 5'-3'        | I 12           | 5'-3'        | no | 36        | 470        |
| 80695792        | 2,745        |             |              |                | 5'-3'        |    | 36        | 425        |
| 81040111        | 2,395        | SEL1L       | 3'-5'        | I 5 E 5 I 4    | 5'-3'        | ok | 39        | 353        |
| 84527198        | 1,775        |             |              |                | 5'-3'        |    | 21        | 489        |
| 84528599        | 2,2          |             |              |                | 5'-3'        |    | 24        | 384        |
| 84543717        | 2,395        |             |              |                | 5'-3'        |    | 27        | 393        |
| 88188513        | 1,845        | EML5        | 3'-5'        | I 28           | 5'-3'        | ok | 18        | 373        |
| 90371720        | 1,885        |             |              |                | 5'-3'        |    | 42        | 281        |
| 91064900        | 1,925        |             |              |                | 5'-3'        |    | 20        | 449        |
| 91127658        | 2,785        | C14orf161   | 3'-5'        | I 23 E 23 I 22 | 5'-3'        | ok | 35        | 427        |
| 92354428        | 2,515        | GOLGA5      | 5'-3'        | I 7            | 5'-3'        | no | 30        | 431        |
| 94631170        | 2,35         | DICER1      | 3'-5'        | I 24 E 24      | 5'-3'        | ok | 33        | 324        |
| 97001526        | 1,48         |             |              |                | 5'-3'        |    | 51        | 290        |
| 98179476        | 1,81         |             |              |                | 5'-3'        |    | 19        | 462        |
| 99789702        | 2,425        | YY1         | 5'-3'        | I 1            | 5'-3'        | no | 42        | 389        |
| 100840419       | 1,235        |             |              |                | 5'-3'        |    | 17        | 261        |
| 105613793       | 2,275        |             |              |                | 5'-3'        |    | 29        | 469        |
| 18554672        | 2,18         |             |              |                | 3'-5'        |    | 41        | 488        |
| 20802630        | 2,685        | HNRNPC      | 3'-5'        | E 2 I 1        | 3'-5'        | no | 34        | 381        |
| 21080871        | 2,035        |             |              |                | 3'-5'        |    | 51        | 401        |
| 21246766        | 2,03         |             |              |                | 3'-5'        |    | 44        | 330        |
| 26349235        | 2,715        |             |              |                | 3'-5'        |    | 37        | 421        |
| 26905841        | 2,12         |             |              |                | 3'-5'        |    | 20        | 408        |
| 29359474        | 2,52         | PRKD1       | 3'-5'        | I 1            | 3'-5'        | no | 33        | 358        |
| 29371485        | 2,425        | PRKD1       | 3'-5'        | I 1            | 3'-5'        | no | 30        | 449        |
| 31344604        | 1,93         | NUBPL       | 5'-3'        | I 7            | 3'-5'        | ok | 51        | 380        |
| 31638298        | 1,99         | ARHGAP5     | 5'-3'        | I 2            | 3'-5'        | ok | 20        | 382        |
| 32552182        | 1,95         | NPAS3       | 5'-3'        | I 1            | 3'-5'        | ok | 53        | 414        |
| 32832098        | 2,615        | NPAS3       | 5'-3'        | I 2            | 3'-5'        | ok | 33        | 441        |
| 32853987        | 2,345        | NPAS3       | 5'-3'        | I 2            | 3'-5'        | ok | 27        | 383        |
| 32878973        | 2,195        | NPAS3       | 5'-3'        | I 2            | 3'-5'        | ok | 37        | 293        |
| 33739394        | 1,975        |             |              |                | 3'-5'        |    | 31        | 269        |
| 34813576        | 2,625        |             |              |                | 3'-5'        |    | 31        | 419        |



|          |       |           |       |           |       |    |    |     |
|----------|-------|-----------|-------|-----------|-------|----|----|-----|
| 37423578 | 2,6   |           |       |           | 3'-5' |    | 37 | 444 |
| 37428335 | 1,835 |           |       |           | 3'-5' |    | 54 | 391 |
| 37428492 | 1,315 |           |       |           | 3'-5' |    | 53 | 541 |
| 37578114 | 2,725 |           |       |           | 3'-5' |    | 35 | 439 |
| 38259192 | 2,025 |           |       |           | 3'-5' |    | 37 | 259 |
| 38995964 | 2,105 |           |       |           | 3'-5' |    | 35 | 563 |
| 41627270 | 2,55  |           |       |           | 3'-5' |    | 29 | 414 |
| 41952777 | 2,465 |           |       |           | 3'-5' |    | 28 | 421 |
| 42683509 | 2,705 |           |       |           | 3'-5' |    | 38 | 413 |
| 44072123 | 2,265 |           |       |           | 3'-5' |    | 44 | 377 |
| 46100581 | 2,775 |           |       |           | 3'-5' |    | 33 | 409 |
| 46425657 | 2,34  | MDGA2     | 3'-5' | 10        | 3'-5' | no | 42 | 372 |
| 46736304 | 1,71  | MDGA2     | 3'-5' | 3         | 3'-5' | no | 18 | 346 |
| 46882180 | 2,355 | MDGA2     | 3'-5' | 1         | 3'-5' | no | 40 | 463 |
| 47377174 | 2,15  |           |       |           | 3'-5' |    | 49 | 404 |
| 47672011 | 2,865 |           |       |           | 3'-5' |    | 35 | 407 |
| 47882013 | 1,13  |           |       |           | 3'-5' |    | 18 | 230 |
| 47997247 | 1,525 |           |       |           | 3'-5' |    | 18 | 509 |
| 48434971 | 1,705 |           |       |           | 3'-5' |    | 54 | 453 |
| 50317611 | 2,625 | NIN       | 3'-5' | 4         | 3'-5' | no | 32 | 389 |
| 51259740 | 2,125 | FRMD6     | 5'-3' | 12        | 3'-5' | ok | 50 | 409 |
| 52335179 | 1,93  |           |       |           | 3'-5' |    | 18 | 390 |
| 58190302 | 1,805 |           |       |           | 3'-5' |    | 19 | 355 |
| 59729622 | 1,815 |           |       |           | 3'-5' |    | 27 | 277 |
| 60026847 | 1,935 |           |       |           | 3'-5' |    | 49 | 361 |
| 60583464 | 2,495 | SLC38A6   | 5'-3' | 12        | 3'-5' | ok | 30 | 435 |
| 61031710 | 2,28  | PRKCH     | 5'-3' | 10        | 3'-5' | ok | 43 | 370 |
| 61571687 | 2,385 | SYT16     | 5'-3' | 1         | 3'-5' | ok | 43 | 391 |
| 61733164 | 1,575 |           |       |           | 3'-5' |    | 20 | 299 |
| 63233597 | 2,215 | SGPP1     | 3'-5' | 2         | 3'-5' | no | 26 | 367 |
| 63885512 | 1,975 |           |       |           | 3'-5' |    | 18 | 419 |
| 65934866 | 2,065 |           |       |           | 3'-5' |    | 51 | 411 |
| 66450430 | 2,21  | GPHN      | 5'-3' | 5         | 3'-5' | ok | 47 | 422 |
| 70505100 | 2,27  | PCNX      | 5'-3' | 4 E 5   5 | 3'-5' | ok | 40 | 338 |
| 72231270 | 1,905 | DPF3      | 3'-5' | 5         | 3'-5' | no | 27 | 295 |
| 72858484 | 2,785 | NUMB      | 3'-5' | 5         | 3'-5' | no | 34 | 401 |
| 72963644 | 1,615 | NUMB      | 3'-5' | 1         | 3'-5' | no | 17 | 481 |
| 75694075 | 2,44  | C14orf118 | 5'-3' | 2         | 3'-5' | ok | 39 | 362 |
| 78906788 | 1,925 | NRXN3     | 5'-3' | 12        | 3'-5' | ok | 19 | 379 |
| 83685331 | 2,455 |           |       |           | 3'-5' |    | 31 | 365 |

|            |                 |              |             |              |                |              |           |              |               |
|------------|-----------------|--------------|-------------|--------------|----------------|--------------|-----------|--------------|---------------|
|            | 86626014        | 2,23         |             |              |                | 3'-5'        |           | 47           | 418           |
|            | 86789902        | 2,05         |             |              |                | 3'-5'        |           | 23           | 454           |
|            | 88413017        | 2,485        | TTC8        | 5'-3'        | I 14 E 15      | 3'-5'        | ok        | 40           | 437           |
|            | 88678211        | 2,1          |             |              |                | 3'-5'        |           | 50           | 404           |
|            | 91728827        | 1,875        |             |              |                | 3'-5'        |           | 26           | 299           |
|            | 103166165       | 2,32         | KLC1        | 5'-3'        | I 1            | 3'-5'        | ok        | 44           | 430           |
| ∅          |                 |              |             | <b>27</b>    |                |              | <b>46</b> | <b>34,61</b> | <b>398,38</b> |
|            |                 |              |             | <b>19</b>    |                |              | <b>22</b> | <b>35,15</b> | <b>394,67</b> |
|            |                 |              |             | <b>46</b>    |                |              | <b>24</b> | <b>34,27</b> | <b>400,69</b> |
| <b>15</b>  | 18596258        | 2,47         |             |              | I              | 5'-3'        |           | 32           | 358           |
|            | 19607508        | 2,47         |             |              |                | 5'-3'        |           | 32           | 358           |
| 85 results | 19849668        | 2,53         |             |              |                | 5'-3'        |           | 36           | 350           |
|            | 22519789        | 1,905        |             |              |                | 5'-3'        |           | 50           | 365           |
|            | 27308110        | 2,47         |             |              |                | 5'-3'        |           | 39           | 368           |
|            | 35801362        | 2,395        |             |              |                | 5'-3'        |           | 27           | 425           |
|            | 36131728        | 2,15         |             |              |                | 5'-3'        |           | 22           | 424           |
|            | 37680074        | 1,575        | FSIP1       | 3'-5'        | E 12 I 11      | 5'-3'        | ok        | 25           | 569           |
|            | 39849175        | 2,43         | MGA         | 5'-3'        | E 24           | 5'-3'        | no        | 43           | 418           |
|            | 40996629        | 2,56         | TTBK2       | 3'-5'        | I 1            | 5'-3'        | ok        | 39           | 386           |
|            | 42370017        | 2,605        | CASC4       | 5'-3'        | I 1            | 5'-3'        | no        | 38           | 433           |
|            | 44173445        | 2,385        |             |              |                | 5'-3'        |           | 44           | 401           |
|            | 44359415        | 2,735        |             |              |                | 5'-3'        |           | 35           | 437           |
|            | 46158418        | 1,955        |             |              |                | 5'-3'        |           | 27           | 513           |
|            | <b>46965860</b> | <b>2,805</b> | <b>SHC4</b> | <b>3'-5'</b> | <b>I 3</b>     | <b>5'-3'</b> | ok        | <b>35</b>    | <b>395</b>    |
|            | 47906699        | 2,315        |             |              |                | 5'-3'        |           | 41           | 357           |
|            | 49157501        | 1,48         | TNFAIP8L3   | 3'-5'        | I 2            | 5'-3'        | ok        | 47           | 250           |
|            | 50596785        | 2,185        | MYO5A       | 3'-5'        | I 1            | 5'-3'        | ok        | 47           | 427           |
|            | 50708044        | 2,48         | KIAA1370    | 3'-5'        | I 2            | 5'-3'        | ok        | 34           | 340           |
|            | 52789173        | 1,72         |             |              |                | 5'-3'        |           | 23           | 298           |
|            | 55018977        | 2,27         | TCF12       | 5'-3'        | I 3            | 5'-3'        | no        | 41           | 470           |
|            | 57528093        | 2,37         | FAM81A      | 5'-3'        | I 1            | 5'-3'        | no        | 29           | 368           |
|            | 58182986        | 2,815        |             |              |                | 5'-3'        |           | 35           | 421           |
|            | 58770084        | 2,27         | RORA        | 3'-5'        | I 1            | 5'-3'        | ok        | 29           | 470           |
|            | 59913083        | 1,825        |             |              |                | 5'-3'        |           | 28           | 549           |
|            | 69071146        | 2,7          | LRRRC49     | 5'-3'        | I 11           | 5'-3'        | no        | 34           | 384           |
|            | 70423230        | 2,15         | HEXA        | 3'-5'        | I 13 E 13 I 12 | 5'-3'        | ok        | 44           | 354           |
|            | 71128564        | 1,61         |             |              |                | 5'-3'        |           | 19           | 316           |
|            | 72646277        | 2,54         | ARID3B      | 5'-3'        | I 2            | 5'-3'        | no        | 40           | 426           |
|            | 75280338        | 2,36         |             |              |                | 5'-3'        |           | 41           | 452           |

|          |       |            |       |                     |       |    |    |     |
|----------|-------|------------|-------|---------------------|-------|----|----|-----|
| 77756432 | 2,39  |            |       |                     | 5'-3' |    | 26 | 402 |
| 79697489 | 2,31  |            |       |                     | 5'-3' |    | 42 | 452 |
| 86419767 | 1,77  | NTRK3      | 3'-5' | 1 12                | 5'-3' | ok | 17 | 450 |
| 87938028 | 2,16  | C15orf42   | 5'-3' | 1 6                 | 5'-3' | no | 22 | 396 |
| 94412795 | 2,485 |            |       |                     | 5'-3' |    | 39 | 371 |
| 96838247 | 2,525 | FLJ39743   | 3'-5' | 1 4                 | 5'-3' | ok | 37 | 359 |
| 96840922 | 2,47  | FLJ39743   | 3'-5' | 1 4 E 4 1 3         | 5'-3' | ok | 37 | 470 |
| 99270977 | 2,735 | ALDH1A3    | 5'-3' | 1 12 E 12           | 5'-3' | no | 33 | 417 |
| 99511066 | 2,035 |            |       |                     | 5'-3' |    | 25 | 341 |
| 18787184 | 2,48  |            |       |                     | 3'-5' |    | 32 | 360 |
| 19129288 | 2,63  |            |       |                     | 3'-5' |    | 36 | 370 |
| 19182082 | 2,28  |            |       |                     | 3'-5' |    | 26 | 380 |
| 20482431 | 2,655 | CYFIP1     | 5'-3' | 1 6                 | 3'-5' | ok | 37 | 385 |
| 23794172 | 2,04  |            |       |                     | 3'-5' |    | 51 | 402 |
| 24482273 | 2,21  | GABRB3     | 3'-5' | 1 3                 | 3'-5' | no | 25 | 376 |
| 24741296 | 2,115 | LOC441742  | 5'-3' | 1 1                 | 3'-5' | ok | 20 | 411 |
| 25475540 | 2,32  |            |       |                     | 3'-5' |    | 25 | 420 |
| 27100006 | 2,6   | APBA2      | 5'-3' | 1 2                 | 3'-5' | ok | 35 | 464 |
| 27547812 | 2,38  |            |       |                     | 3'-5' |    | 31 | 468 |
| 30582986 | 2,62  |            |       |                     | 3'-5' |    | 39 | 420 |
| 32116823 | 1,975 | AVEN/CHRM5 | 3'-5' | 1 1                 | 3'-5' | no | 22 | 359 |
| 33747295 | 1,65  |            |       |                     | 3'-5' |    | 44 | 564 |
| 33865445 | 2,09  |            |       |                     | 3'-5' |    | 47 | 372 |
| 36483537 | 1,45  |            |       |                     | 3'-5' |    | 44 | 214 |
| 38579614 | 1,9   |            |       |                     | 3'-5' |    | 16 | 414 |
| 42727584 | 2,635 | SPG11      | 3'-5' | 1 7                 | 3'-5' | no | 36 | 371 |
| 49444318 | 2,545 | GLDN       | 5'-3' | 1 1                 | 3'-5' | ok | 31 | 383 |
| 52390913 | 2,035 | UNC13C     | 5'-3' | 1 12                | 3'-5' | ok | 19 | 401 |
| 54471604 | 1,985 | TEX9       | 5'-3' | 1 7                 | 3'-5' | ok | 31 | 271 |
| 62643104 | 1,57  | ZNF609     | 5'-3' | 1 1                 | 3'-5' | ok | 45 | 248 |
| 63626781 | 1,89  | PTPLAD1    | 5'-3' | 1 1                 | 3'-5' | ok | 43 | 526 |
| 64387545 | 1,85  | DIS3L      | 5'-3' | 1 3 E 4             | 3'-5' | ok | 49 | 344 |
| 64400157 | 2,435 | DIS3L      | 5'-3' | 1 9                 | 3'-5' | ok | 27 | 401 |
| 65082876 | 2,61  |            |       |                     | 3'-5' |    | 32 | 386 |
| 65315777 | 2,265 | FLJ11506   | 3'-5' | 1 1 E 2 1 2 E 3 1 3 | 3'-5' | no | 24 | 421 |
| 65686715 | 1,57  | MAP2K5     | 5'-3' | 1 8                 | 3'-5' | ok | 42 | 218 |
| 65918879 | 2,315 |            |       |                     | 3'-5' |    | 28 | 367 |
| 68794020 | 2,185 | UACA       | 3'-5' | 1 1                 | 3'-5' | no | 22 | 401 |
| 69925360 | 1,505 | MYO9A      | 3'-5' | 1 39                | 3'-5' | no | 19 | 523 |
| 70592139 | 1,57  | ARIH1      | 5'-3' | 1 1                 | 3'-5' | ok | 20 | 298 |

|            |                 |              |              |              |            |              |           |              |               |
|------------|-----------------|--------------|--------------|--------------|------------|--------------|-----------|--------------|---------------|
|            | 71037272        | 2,075        |              |              |            | 3'-5'        |           | 49           | 389           |
|            | 71575868        | 2,78         | LOC283677    | 5'-3'        | 1 2        | 3'-5'        | ok        | 34           | 418           |
|            | 74944398        | 2,24         | SCAPER       | 3'-5'        | 1 1        | 3'-5'        | no        | 47           | 402           |
|            | 77980392        | 2,455        | ST20         | 3'-5'        | 1 2        | 3'-5'        | no        | 28           | 395           |
|            | 78042804        | 2,385        | BCL2A1       | 3'-5'        | 1 1        | 3'-5'        | no        | 28           | 381           |
|            | <b>78520611</b> | <b>1,865</b> | <b>ARNT2</b> | <b>5'-3'</b> | <b>1 1</b> | <b>3'-5'</b> | ok        | <b>19</b>    | <b>451</b>    |
|            | 80194641        | 1,97         |              |              |            | 3'-5'        |           | 50           | 440           |
|            | 81663439        | 2,635        | HDGFRP3      | 3'-5'        | 1 1        | 3'-5'        | no        | 37           | 381           |
|            | 82507668        | 2,025        |              |              |            | 3'-5'        |           | 36           | 569           |
|            | 84380993        | 2,525        |              |              |            | 3'-5'        |           | 39           | 439           |
|            | 84924276        | 1,93         | LOC731136    | 5'-3'        | 1 2        | 3'-5'        | ok        | 17           | 400           |
|            | 90842544        | 1,975        | C15orf32     | 5'-3'        | 1 2        | 3'-5'        | ok        | 43           | 509           |
|            | 96012906        | 1,95         |              |              |            | 3'-5'        |           | 19           | 384           |
|            | 96069712        | 1,96         |              |              |            | 3'-5'        |           | 22           | 356           |
|            | 98628293        | 1,96         | ADAMTS17     | 3'-5'        | 1 4        | 3'-5'        | no        | 53           | 412           |
| <b>Ø</b>   |                 |              |              | <b>24</b>    |            |              | <b>46</b> | <b>33,56</b> | <b>400,05</b> |
|            |                 |              |              | <b>22</b>    |            |              | <b>19</b> | <b>33,13</b> | <b>398,52</b> |
|            |                 |              |              | <b>46</b>    |            |              | <b>27</b> | <b>34,08</b> | <b>401,85</b> |
| <b>16</b>  | 46              | 1,2          |              |              | 1          | 5'-3'        |           | 20           | 224           |
|            | 2207814         | 2,305        |              |              |            | 5'-3'        |           | 32           | 325           |
| 81 results | 14182587        | 2,455        | MKL2         | 5'-3'        | 1 3        | 5'-3'        | no        | 43           | 413           |
|            | 15842433        | 2,33         | MYH11        | 3'-5'        | 1 1        | 5'-3'        | ok        | 25           | 418           |
|            | 17487577        | 2,31         |              |              |            | 5'-3'        |           | 41           | 462           |
|            | 17670683        | 2,48         |              |              |            | 5'-3'        |           | 28           | 400           |
|            | 18808932        | 1,77         | SMG1         | 3'-5'        | 1 5        | 5'-3'        | ok        | 43           | 550           |
|            | 21396178        | 1,865        |              |              |            | 5'-3'        |           | 43           | 531           |
|            | 21827971        | 1,865        |              |              |            | 5'-3'        |           | 43           | 531           |
|            | 23522270        | 2,03         | PALB2        | 3'-5'        | E 13   12  | 5'-3'        | ok        | 21           | 380           |
|            | 24552140        | 2,55         |              |              |            | 5'-3'        |           | 39           | 384           |
|            | 29478244        | 1,865        |              |              |            | 5'-3'        |           | 43           | 531           |
|            | 30217956        | 1,865        |              |              |            | 5'-3'        |           | 43           | 531           |
|            | 31209272        | 2,555        | ITGAM        | 5'-3'        | 1 12       | 5'-3'        | no        | 41           | 405           |
|            | 32244905        | 2,48         |              |              |            | 5'-3'        |           | 32           | 360           |
|            | 47177883        | 2,205        | N4BP1        | 3'-5'        | 1 1        | 5'-3'        | ok        | 23           | 395           |
|            | 49352156        | 2,36         | CYLD         | 5'-3'        | 1 6        | 5'-3'        | no        | 43           | 386           |
|            | 49357347        | 2,59         | CYLD         | 5'-3'        | 1 6        | 5'-3'        | no        | 32           | 382           |
|            | 51063949        | 2,285        | TOX3         | 3'-5'        | 1 1        | 5'-3'        | ok        | 26           | 437           |
|            | 51073724        | 2,365        | TOX3         | 3'-5'        | 1 1        | 5'-3'        | ok        | 31           | 471           |
|            | 51157879        | 2,75         |              |              |            | 5'-3'        |           | 33           | 414           |

|          |       |          |       |         |       |    |    |     |
|----------|-------|----------|-------|---------|-------|----|----|-----|
| 51580600 | 1,74  |          |       |         | 5'-3' |    | 26 | 272 |
| 52776826 | 2,63  |          |       |         | 5'-3' |    | 32 | 390 |
| 53446729 | 2     |          |       |         | 5'-3' |    | 33 | 254 |
| 55001061 | 1,575 | AMFR     | 3'-5' | 1 2     | 5'-3' | ok | 22 | 539 |
| 59426988 | 2,255 |          |       |         | 5'-3' |    | 25 | 385 |
| 60093731 | 2,7   |          |       |         | 5'-3' |    | 38 | 404 |
| 60580847 | 1,965 | CDH8     | 3'-5' | 1 2     | 5'-3' | ok | 51 | 431 |
| 61863100 | 2,175 |          |       |         | 5'-3' |    | 22 | 399 |
| 63303938 | 2,335 |          |       |         | 5'-3' |    | 28 | 371 |
| 63355574 | 2,355 |          |       |         | 5'-3' |    | 41 | 453 |
| 68031878 | 2,535 | CYB5B    | 5'-3' | 1 1     | 5'-3' | no | 34 | 351 |
| 68341024 | 1,99  | NOB1     | 3'-5' | E 4   3 | 5'-3' | ok | 20 | 382 |
| 71067381 | 2,545 |          |       |         | 5'-3' |    | 41 | 415 |
| 71770132 | 2,06  |          |       |         | 5'-3' |    | 46 | 462 |
| 73714066 | 2,49  |          |       |         | 5'-3' |    | 31 | 372 |
| 78505354 | 2,705 |          |       |         | 5'-3' |    | 38 | 405 |
| 82956836 | 1,585 |          |       |         | 5'-3' |    | 51 | 507 |
| 1597620  | 1,51  |          |       |         | 3'-5' |    | 22 | 266 |
| 6390811  | 2,38  | A2BP1    | 5'-3' | 1 2     | 3'-5' | ok | 26 | 418 |
| 6544716  | 1,285 | A2BP1    | 5'-3' | 1 2     | 3'-5' | ok | 18 | 261 |
| 6781572  | 1,94  | A2BP1    | 5'-3' | 1 3     | 3'-5' | ok | 17 | 416 |
| 7818197  | 2,375 |          |       |         | 3'-5' |    | 25 | 409 |
| 10154295 | 2,115 | GRIN2A   | 3'-5' | 1 3     | 3'-5' | no | 37 | 277 |
| 11732285 | 2,415 | TXNDC11  | 3'-5' | 1 3     | 3'-5' | no | 29 | 441 |
| 12303548 | 2,545 | LOC92017 | 5'-3' | 1 9     | 3'-5' | ok | 30 | 393 |
| 13043691 | 1,92  |          |       |         | 3'-5' |    | 27 | 298 |
| 20029764 | 2,21  |          |       |         | 3'-5' |    | 48 | 412 |
| 20941623 | 1,885 | DNAH3    | 3'-5' | 1 39    | 3'-5' | no | 34 | 221 |
| 21041882 | 2,495 | DNAH3    | 3'-5' | 1 9     | 3'-5' | no | 29 | 425 |
| 22379775 | 1,865 |          |       |         | 3'-5' |    | 43 | 531 |
| 22694296 | 1,91  |          |       |         | 3'-5' |    | 53 | 422 |
| 24843282 | 2,325 | ARHGAP17 | 3'-5' | 1 19    | 3'-5' | no | 28 | 369 |
| 25534763 | 2,1   |          |       |         | 3'-5' |    | 44 | 474 |
| 26315029 | 2,37  |          |       |         | 3'-5' |    | 32 | 338 |
| 26405549 | 1,675 |          |       |         | 3'-5' |    | 54 | 459 |
| 33848072 | 2,065 |          |       |         | 3'-5' |    | 51 | 411 |
| 45153530 | 1,905 |          |       |         | 3'-5' |    | 53 | 395 |
| 52236327 | 2,755 | RPGRIP1L | 3'-5' | 1 17    | 3'-5' | no | 35 | 385 |
| 54218748 | 2,245 |          |       |         | 3'-5' |    | 41 | 475 |
| 54544030 | 2,27  |          |       |         | 3'-5' |    | 25 | 388 |

|          |       |          |           |     |       |           |              |               |
|----------|-------|----------|-----------|-----|-------|-----------|--------------|---------------|
| 58507014 | 1,86  |          |           |     | 3'-5' |           | 20           | 356           |
| 60469226 | 2,165 | CDH8     | 3'-5'     | 1 3 | 3'-5' | no        | 27           | 471           |
| 62678487 | 2,155 |          |           |     | 3'-5' |           | 38           | 523           |
| 62835735 | 1,61  |          |           |     | 3'-5' |           | 27           | 236           |
| 63460658 | 2,195 |          |           |     | 3'-5' |           | 46           | 435           |
| 63525506 | 1,925 |          |           |     | 3'-5' |           | 48           | 469           |
| 67252190 | 2,075 | CDH3     | 5'-3'     | 1 2 | 3'-5' | ok        | 19           | 409           |
| 70823851 | 1,635 |          |           |     | 3'-5' |           | 23           | 281           |
| 72611149 | 2,31  |          |           |     | 3'-5' |           | 32           | 326           |
| 73735321 | 2,215 |          |           |     | 3'-5' |           | 23           | 397           |
| 74720038 | 2,29  |          |           |     | 3'-5' |           | 46           | 402           |
| 76422395 | 2,46  | KIAA1576 | 5'-3'     | 1 3 | 3'-5' | ok        | 28           | 396           |
| 76431772 | 2,4   | KIAA1576 | 5'-3'     | 1 3 | 3'-5' | ok        | 28           | 434           |
| 77620392 | 1,88  | WVOX     | 5'-3'     | 1 5 | 3'-5' | ok        | 41           | 270           |
| 77622920 | 2,455 | WVOX     | 5'-3'     | 1 5 | 3'-5' | ok        | 36           | 483           |
| 77624004 | 2,615 | WVOX     | 5'-3'     | 1 5 | 3'-5' | ok        | 36           | 451           |
| 79605929 | 1,66  | CENPN    | 5'-3'     | 1 3 | 3'-5' | ok        | 21           | 306           |
| 80752592 | 2,25  | MPHOSPH6 | 3'-5'     | 1 2 | 3'-5' | no        | 45           | 434           |
| 81423564 | 2,465 | CDH13    | 5'-3'     | 1 1 | 3'-5' | ok        | 27           | 407           |
| 82094601 | 2,195 | CDH13    | 5'-3'     | 1 1 | 3'-5' | ok        | 42           | 475           |
| <b>Ø</b> |       |          | <b>18</b> |     |       | <b>35</b> | <b>34,05</b> | <b>402,06</b> |
|          |       |          | <b>17</b> |     |       | <b>13</b> | <b>31,09</b> | <b>402,34</b> |
|          |       |          | <b>35</b> |     |       | <b>22</b> | <b>36,3</b>  | <b>401,85</b> |

17  
68 results

|          |       |       |       |      |       |    |    |     |
|----------|-------|-------|-------|------|-------|----|----|-----|
| 1064471  | 2,675 |       |       | 1    | 5'-3' |    | 38 | 399 |
| 1737617  | 1,565 | RPA1  | 5'-3' | 1 13 | 5'-3' | no | 45 | 571 |
| 1746481  | 1,23  | RPA1  | 5'-3' | 1 16 | 5'-3' | no | 20 | 230 |
| 7999126  | 2,22  |       |       |      | 5'-3' |    | 22 | 408 |
| 12654959 | 1,605 | RICH2 | 5'-3' | 1 1  | 5'-3' | no | 41 | 603 |
| 13219652 | 2,755 |       |       |      | 5'-3' |    | 37 | 405 |
| 14042952 | 1,745 | COX10 | 5'-3' | 1 6  | 5'-3' | no | 24 | 293 |
| 16513888 | 2,575 |       |       |      | 5'-3' |    | 30 | 419 |
| 19236523 | 2,42  |       |       |      | 5'-3' |    | 27 | 420 |
| 21424902 | 2,535 |       |       |      | 5'-3' |    | 33 | 361 |
| 26573299 | 1,89  | NF1   | 5'-3' | 1 15 | 5'-3' | no | 18 | 436 |
| 27266679 | 2,125 |       |       |      | 5'-3' |    | 50 | 409 |
| 28147378 | 1,7   | MYO1D | 3'-5' | 1 1  | 5'-3' | ok | 17 | 464 |
| 28164039 | 1,865 | MYO1D | 3'-5' | 1 1  | 5'-3' | ok | 45 | 307 |
| 30937505 | 1,675 |       |       |      | 5'-3' |    | 19 | 329 |
| 33684122 | 1,82  |       |       |      | 5'-3' |    | 21 | 480 |

|                 |             |             |              |               |              |           |           |            |
|-----------------|-------------|-------------|--------------|---------------|--------------|-----------|-----------|------------|
| 33932347        | 2,615       |             |              |               | 5'-3'        |           | 40        | 407        |
| 42597359        | 2,755       | CDC27       | 3'-5'        | 14            | 5'-3'        | ok        | 34        | 395        |
| 42604094        | 1,82        | CDC27       | 3'-5'        | 13 E 3   2    | 5'-3'        | ok        | 16        | 430        |
| 43717037        | 2,39        | SKAP1       | 3'-5'        | 14            | 5'-3'        | ok        | 27        | 392        |
| 44858177        | 2,57        |             |              |               | 5'-3'        |           | 31        | 430        |
| 46471465        | 2,35        | SPAG9       | 3'-5'        | 15            | 5'-3'        | ok        | 42        | 444        |
| 48561290        | 2,115       |             |              |               | 5'-3'        |           | 23        | 377        |
| 49398485        | 2,075       |             |              |               | 5'-3'        |           | 23        | 449        |
| 51086450        | 2,53        |             |              |               | 5'-3'        |           | 29        | 400        |
| 52295041        | 2,215       | DGKE        | 5'-3'        | E 11          | 5'-3'        | no        | 23        | 421        |
| 53962059        | 2,455       | SEPT4       | 3'-5'        | 11            | 5'-3'        | ok        | 31        | 453        |
| 56562306        | 2,385       | BCAS3       | 5'-3'        | 122           | 5'-3'        | no        | 43        | 427        |
| 56987224        | 2,075       |             |              |               | 5'-3'        |           | 51        | 409        |
| 57032603        | 2,275       |             |              |               | 5'-3'        |           | 40        | 479        |
| 57929291        | 2,095       | TLK2        | 5'-3'        | 12            | 5'-3'        | no        | 48        | 383        |
| 58591560        | 2,61        |             |              |               | 5'-3'        |           | 39        | 396        |
| 59259967        | 2,3         | PSMC5       | 5'-3'        | 12 E 3        | 5'-3'        | no        | 29        | 354        |
| 63284722        | 1,86        | BPTF        | 5'-3'        | 12            | 5'-3'        | no        | 41        | 266        |
| 63722879        | 1,86        |             |              |               | 5'-3'        |           | 41        | 266        |
| 65586106        | 2,385       | KCNJ16      | 5'-3'        | 11            | 5'-3'        | no        | 42        | 437        |
| 66082405        | 2,345       |             |              |               | 5'-3'        |           | 25        | 403        |
| 68567518        | 2,175       | SLC39A11    | 3'-5'        | 13            | 5'-3'        | ok        | 40        | 499        |
| 78176122        | 1,475       | WDR45L      | 3'-5'        | 15 E 5   4    | 5'-3'        | ok        | 23        | 569        |
| 6576465         | 2,625       |             |              |               | 3'-5'        |           | 40        | 409        |
| 8787363         | 1,745       |             |              |               | 3'-5'        |           | 53        | 455        |
| 9168866         | 1,815       | STX8        | 3'-5'        | 17            | 3'-5'        | no        | 40        | 247        |
| 11746857        | 1,115       | DNAH9       | 5'-3'        | E 60   60     | 3'-5'        | ok        | 16        | 247        |
| 12361171        | 2,63        |             |              |               | 3'-5'        |           | 33        | 380        |
| 13958175        | 2,27        | COX10       | 5'-3'        | 14            | 3'-5'        | ok        | 47        | 408        |
| 14567823        | 2,315       |             |              |               | 3'-5'        |           | 40        | 347        |
| 17849998        | 1,735       | LRRC48      | 5'-3'        | 110 E 11   11 | 3'-5'        | ok        | 20        | 331        |
| 21742260        | 2,535       |             |              |               | 3'-5'        |           | 33        | 361        |
| 22306637        | 2,03        |             |              |               | 3'-5'        |           | 51        | 418        |
| 26555677        | 2,325       | NF1         | 5'-3'        | 111           | 3'-5'        | ok        | 41        | 459        |
| 31264094        | 1,72        |             |              |               | 3'-5'        |           | 48        | 510        |
| 31293041        | 2,585       |             |              |               | 3'-5'        |           | 30        | 417        |
| 36271157        | 2,7         | KRT12       | 3'-5'        | E 8   7       | 3'-5'        | no        | 34        | 434        |
| 36754503        | 2,425       |             |              |               | 3'-5'        |           | 26        | 409        |
| 46464823        | 2           | SPAG9       | 3'-5'        | 15            | 3'-5'        | no        | 20        | 434        |
| <b>47228679</b> | <b>2,72</b> | <b>CA10</b> | <b>3'-5'</b> | <b>13</b>     | <b>3'-5'</b> | <b>no</b> | <b>37</b> | <b>420</b> |

|             |          |       |         |           |                     |       |           |              |               |
|-------------|----------|-------|---------|-----------|---------------------|-------|-----------|--------------|---------------|
|             | 48678979 | 1,805 |         |           |                     | 3'-5' |           | 17           | 375           |
|             | 49413982 | 1,415 |         |           |                     | 3'-5' |           | 45           | 217           |
|             | 50641710 | 2,575 |         |           |                     | 3'-5' |           | 30           | 419           |
|             | 52619436 | 2,27  |         |           |                     | 3'-5' |           | 47           | 408           |
|             | 53894347 | 1,67  | HSF5    | 3'-5'     | 14                  | 3'-5' | no        | 18           | 480           |
|             | 56885404 | 2,22  |         |           |                     | 3'-5' |           | 48           | 410           |
|             | 57441315 | 2,535 | MED13   | 3'-5'     | 19                  | 3'-5' | no        | 40           | 391           |
|             | 60671356 | 2,255 |         |           |                     | 3'-5' |           | 43           | 453           |
|             | 64375581 | 2,875 | ABCA8   | 3'-5'     | E 37   37 E 36   36 | 3'-5' | no        | 35           | 409           |
|             | 66276111 | 1,75  |         |           |                     | 3'-5' |           | 22           | 314           |
|             | 69433603 | 1,885 |         |           |                     | 3'-5' |           | 46           | 497           |
|             | 72246502 | 1,8   | MFSD11  | 5'-3'     | 12 E 3   3          | 3'-5' | ok        | 26           | 534           |
| <b>Ø</b>    |          |       |         | <b>16</b> |                     |       | <b>32</b> | <b>33,74</b> | <b>406,07</b> |
|             |          |       |         | <b>16</b> |                     |       | <b>18</b> | <b>31,97</b> | <b>411,5</b>  |
|             |          |       |         | <b>32</b> |                     |       | <b>14</b> | <b>35,31</b> | <b>401,25</b> |
| <b>18</b>   | 1180474  | 2,095 |         |           | 1                   | 5'-3' |           | 21           | 425           |
|             | 3091644  | 2,275 | MYOM1   | 3'-5'     | 123                 | 5'-3' | ok        | 28           | 359           |
| 116 results | 3556728  | 2,51  | DLGAP1  | 3'-5'     | 17                  | 5'-3' | ok        | 33           | 462           |
|             | 3925173  | 1,705 |         |           |                     | 5'-3' |           | 22           | 305           |
|             | 4152467  | 2,535 |         |           |                     | 5'-3' |           | 40           | 391           |
|             | 4433861  | 2,765 |         |           |                     | 5'-3' |           | 34           | 421           |
|             | 9271859  | 2,715 | ANKRD12 | 5'-3'     | E 13                | 5'-3' | no        | 35           | 377           |
|             | 11156985 | 1,47  |         |           |                     | 5'-3' |           | 19           | 530           |
|             | 11548809 | 2,56  |         |           |                     | 5'-3' |           | 35           | 472           |
|             | 17361489 | 1,845 |         |           |                     | 5'-3' |           | 29           | 555           |
|             | 19078544 | 2,1   | CABLES1 | 5'-3'     | 17                  | 5'-3' | no        | 48           | 384           |
|             | 20397687 | 2,555 |         |           |                     | 5'-3' |           | 34           | 463           |
|             | 22921505 | 1,86  | CHST9   | 3'-5'     | 12                  | 5'-3' | ok        | 51           | 452           |
|             | 25521913 | 1,995 |         |           |                     | 5'-3' |           | 51           | 425           |
|             | 26481309 | 2,465 |         |           |                     | 5'-3' |           | 27           | 407           |
|             | 27128754 | 2,34  |         |           |                     | 5'-3' |           | 37           | 322           |
|             | 34323893 | 2,15  |         |           |                     | 5'-3' |           | 46           | 444           |
|             | 35299044 | 2,14  |         |           |                     | 5'-3' |           | 25           | 456           |
|             | 35437710 | 1,92  |         |           |                     | 5'-3' |           | 30           | 268           |
|             | 35475006 | 2,725 |         |           |                     | 5'-3' |           | 33           | 399           |
|             | 36002443 | 2,5   |         |           |                     | 5'-3' |           | 42           | 414           |
|             | 37233952 | 2,46  |         |           |                     | 5'-3' |           | 27           | 406           |
|             | 37329505 | 1,365 |         |           |                     | 5'-3' |           | 17           | 531           |
|             | 38684869 | 2,28  | RIT2    | 3'-5'     | 14                  | 5'-3' | ok        | 24           | 418           |



|                 |              |          |       |                |              |    |           |            |
|-----------------|--------------|----------|-------|----------------|--------------|----|-----------|------------|
| 38933395        | 2,425        | RIT2     | 3'-5' | 1 1            | 5'-3'        | ok | 43        | 399        |
| 39013709        | 1,855        |          |       |                | 5'-3'        |    | 17        | 385        |
| 39620366        | 1,95         |          |       |                | 5'-3'        |    | 47        | 474        |
| <b>41229807</b> | <b>1,675</b> |          |       |                | <b>5'-3'</b> |    | <b>21</b> | <b>509</b> |
| 42859600        | 2,205        | KATNAL2  | 5'-3' | 1 12           | 5'-3'        | no | 22        | 413        |
| 43224742        | 2,07         |          |       |                | 5'-3'        |    | 48        | 440        |
| 43547936        | 2,13         |          |       |                | 5'-3'        |    | 23        | 380        |
| 45819369        | 2,35         | MYO5B    | 3'-5' | 1 3            | 5'-3'        | ok | 38        | 334        |
| 45845095        | 1,895        | MYO5B    | 3'-5' | 1 1            | 5'-3'        | ok | 22        | 343        |
| 46972030        | 2,5          | MEX3C    | 3'-5' | 1 1            | 5'-3'        | ok | 31        | 444        |
| 48492821        | 1,265        | DCC      | 5'-3' | 1 1            | 5'-3'        | no | 16        | 541        |
| 50212386        | 2,12         |          |       |                | 5'-3'        |    | 23        | 440        |
| 56805776        | 2,55         |          |       |                | 5'-3'        |    | 33        | 454        |
| 57555564        | 2,195        |          |       |                | 5'-3'        |    | 41        | 333        |
| 58768496        | 2,435        | PHLPP    | 5'-3' | 1 13           | 5'-3'        | no | 33        | 477        |
| 61840830        | 2,365        |          |       |                | 5'-3'        |    | 26        | 421        |
| 62248737        | 2,39         |          |       |                | 5'-3'        |    | 43        | 392        |
| 63103099        | 2,265        |          |       |                | 5'-3'        |    | 47        | 411        |
| 64415202        | 2,275        |          |       |                | 5'-3'        |    | 43        | 369        |
| 64855387        | 2,115        | CCDC102B | 5'-3' | 1 6            | 5'-3'        | no | 21        | 397        |
| 65813084        | 2,735        |          |       |                | 5'-3'        |    | 33        | 401        |
| 68528257        | 2,285        |          |       |                | 5'-3'        |    | 33        | 311        |
| 68622288        | 1,91         | NETO1    | 3'-5' | 1 4            | 5'-3'        | ok | 18        | 386        |
| 68631083        | 1,955        | NETO1    | 3'-5' | 1 4            | 5'-3'        | ok | 26        | 503        |
| 68850519        | 2,705        |          |       |                | 5'-3'        |    | 34        | 433        |
| 69390852        | 2,27         |          |       |                | 5'-3'        |    | 24        | 420        |
| 70684326        | 2,225        | ZNF407   | 5'-3' | 1 3            | 5'-3'        | no | 28        | 469        |
| 70991347        | 2,07         |          |       |                | 5'-3'        |    | 19        | 410        |
| 73322082        | 1,98         |          |       |                | 5'-3'        |    | 23        | 468        |
| 74206796        | 2,005        |          |       |                | 5'-3'        |    | 20        | 385        |
| 1443280         | 2,71         |          |       |                | 3'-5'        |    | 37        | 396        |
| 1717706         | 2,55         |          |       |                | 3'-5'        |    | 39        | 434        |
| 1894295         | 2,305        |          |       |                | 3'-5'        |    | 44        | 385        |
| 3243479         | 1,77         | MRCL3    | 5'-3' | 1 2 E 3 1 3    | 3'-5'        | ok | 17        | 450        |
| 5074608         | 2,44         |          |       |                | 3'-5'        |    | 43        | 416        |
| 7028342         | 1,6          | LAMA1    | 3'-5' | 1 11 E 11 1 10 | 3'-5'        | no | 51        | 504        |
| 7905901         | 1,745        | PTPRM    | 5'-3' | 1 4            | 3'-5'        | ok | 54        | 445        |
| 11097455        | 2,005        |          |       |                | 3'-5'        |    | 19        | 395        |
| 13811148        | 2,12         |          |       |                | 3'-5'        |    | 37        | 278        |
| 14069023        | 2,18         |          |       |                | 3'-5'        |    | 24        | 380        |

|                 |             |             |              |             |              |    |           |            |
|-----------------|-------------|-------------|--------------|-------------|--------------|----|-----------|------------|
| 17770927        | 2,025       |             |              |             | 3'-5'        |    | 52        | 409        |
| 18402623        | 2,565       |             |              |             | 3'-5'        |    | 30        | 421        |
| 22997738        | 2,465       | CHST9       | 3'-5'        | 1 1         | 3'-5'        | no | 32        | 357        |
| <b>23292389</b> | <b>2,16</b> |             |              |             | <b>3'-5'</b> |    | <b>26</b> | <b>462</b> |
| 23707691        | 2,135       |             |              |             | 3'-5'        |    | 49        | 417        |
| 23896462        | 2,32        | CDH2        | 3'-5'        | 1 2         | 3'-5'        | no | 29        | 460        |
| 25918778        | 2,105       |             |              |             | 3'-5'        |    | 48        | 433        |
| 27879196        | 2,585       | RNF125      | 5'-3'        | 1 3 E 4 1 4 | 3'-5'        | ok | 33        | 447        |
| 28797348        | 1,98        | C18orf34    | 3'-5'        | 1 21        | 3'-5'        | no | 49        | 448        |
| 28814902        | 1,885       | C18orf34    | 3'-5'        | 1 20        | 3'-5'        | no | 51        | 371        |
| 29883901        | 1,595       | NOL4        | 3'-5'        | 1 5         | 3'-5'        | no | 54        | 475        |
| 31205752        | 2,21        | ZNF396      | 3'-5'        | 1 3         | 3'-5'        | no | 27        | 462        |
| 31758435        | 2,445       |             |              |             | 3'-5'        |    | 33        | 343        |
| 34374270        | 2,385       |             |              |             | 3'-5'        |    | 39        | 351        |
| 34467977        | 2,545       |             |              |             | 3'-5'        |    | 30        | 393        |
| 34872934        | 2,4         |             |              |             | 3'-5'        |    | 42        | 384        |
| 35842704        | 2,365       |             |              |             | 3'-5'        |    | 42        | 377        |
| 37352141        | 2,47        |             |              |             | 3'-5'        |    | 31        | 450        |
| 37622743        | 1,91        |             |              |             | 3'-5'        |    | 51        | 376        |
| 38756074        | 1,845       | RIT2        | 3'-5'        | 1 4         | 3'-5'        | no | 17        | 383        |
| 41235289        | 2,11        |             |              |             | 3'-5'        |    | 47        | 376        |
| 42385525        | 2,545       |             |              |             | 3'-5'        |    | 32        | 445        |
| 43264205        | 2,325       |             |              |             | 3'-5'        |    | 30        | 469        |
| 43829423        | 1,985       |             |              |             | 3'-5'        |    | 38        | 557        |
| 48342075        | 1,355       | DCC         | 5'-3'        | 1 1         | 3'-5'        | ok | 54        | 523        |
| 48747980        | 1,935       | DCC         | 5'-3'        | 1 5         | 3'-5'        | ok | 17        | 417        |
| 48782194        | 2,58        | DCC         | 5'-3'        | 1 5         | 3'-5'        | ok | 39        | 428        |
| 49373938        | 1,745       |             |              |             | 3'-5'        |    | 28        | 565        |
| 49500554        | 2,56        |             |              |             | 3'-5'        |    | 38        | 376        |
| 50148387        | 2,39        | C18orf54    | 5'-3'        | 1 5         | 3'-5'        | ok | 37        | 486        |
| 50520556        | 2,12        |             |              |             | 3'-5'        |    | 28        | 328        |
| <b>51054845</b> | <b>1,72</b> | <b>TCF4</b> | <b>3'-5'</b> | <b>1 15</b> | <b>3'-5'</b> | no | <b>53</b> | <b>358</b> |
| 52592721        | 1,91        | WDR7        | 5'-3'        | 1 16        | 3'-5'        | ok | 33        | 236        |
| 56770460        | 2,075       |             |              |             | 3'-5'        |    | 50        | 399        |
| 58317515        | 1,565       |             |              |             | 3'-5'        |    | 51        | 511        |
| 58548951        | 2,105       | PHLPP       | 3'-5'        | 1 2         | 3'-5'        | no | 37        | 543        |
| 58948215        | 1,86        | BCL2        | 3'-5'        | 1 2         | 3'-5'        | no | 52        | 376        |
| 59409383        | 2,005       | SERPINB13   | 5'-3'        | 1 3         | 3'-5'        | ok | 29        | 295        |
| 60596819        | 2,53        |             |              |             | 3'-5'        |    | 32        | 370        |
| 61831334        | 1,675       |             |              |             | 3'-5'        |    | 16        | 359        |

|            |                |              |             |              |                |              |           |              |               |
|------------|----------------|--------------|-------------|--------------|----------------|--------------|-----------|--------------|---------------|
|            | 62100901       | 2,37         |             |              |                | 3'-5'        |           | 43           | 430           |
|            | 62330350       | 2,19         | CDH19       | 3'-5'        | 19             | 3'-5'        | no        | 25           | 372           |
|            | 63319502       | 2,46         |             |              |                | 3'-5'        |           | 27           | 412           |
|            | 65831373       | 1,98         | RTTN        | 3'-5'        | 146            | 3'-5'        | no        | 40           | 280           |
|            | 65982816       | 1,85         | RTTN        | 3'-5'        | 114            | 3'-5'        | no        | 16           | 394           |
|            | 66549290       | 2,38         |             |              |                | 3'-5'        |           | 40           | 360           |
|            | 67334483       | 2,45         |             |              |                | 3'-5'        |           | 42           | 424           |
|            | 67382266       | 2,36         | 48957/AK093 | 3'-5'        | 11             | 3'-5'        | no        | 38           | 482           |
|            | 68735849       | 2,55         |             |              |                | 3'-5'        |           | 35           | 344           |
|            | 68795614       | 2            |             |              |                | 3'-5'        |           | 40           | 534           |
|            | 70716323       | 2,04         | ZNF407      | 5'-3'        | 13             | 3'-5'        | ok        | 42           | 506           |
|            | 71263201       | 1,865        | LOC284274   | 3'-5'        | 11             | 3'-5'        | no        | 17           | 387           |
| <b>Ø</b>   |                |              |             |              |                |              |           |              |               |
|            |                |              |             | <b>17</b>    |                |              | <b>43</b> | <b>34,14</b> | <b>416,14</b> |
|            |                |              |             | <b>26</b>    |                |              | <b>23</b> | <b>33,95</b> | <b>419,6</b>  |
|            |                |              |             | <b>43</b>    |                |              | <b>20</b> | <b>34,25</b> | <b>414,1</b>  |
| <b>19</b>  | <b>6935702</b> | <b>1,695</b> | <b>EMR4</b> | <b>3'-5'</b> | <b>E 5   4</b> | <b>5'-3'</b> | ok        | <b>48</b>    | <b>303</b>    |
|            | 14805360       | 2,49         |             |              |                | 5'-3'        |           | 34           | 342           |
| 24 results | 20075971       | 1,84         |             |              |                | 5'-3'        |           | 48           | 332           |
|            | 21903769       | 2,26         |             |              |                | 5'-3'        |           | 35           | 532           |
|            | 22899464       | 2,155        |             |              |                | 5'-3'        |           | 35           | 265           |
|            | 35197605       | 2,8          | C19orf2     | 5'-3'        | 110 E 11       | 5'-3'        | no        | 35           | 394           |
|            | 35997270       | 1,435        |             |              |                | 5'-3'        |           | 48           | 567           |
|            | 36640476       | 2,395        |             |              |                | 5'-3'        |           | 29           | 373           |
|            | 37396007       | 2,795        |             |              |                | 5'-3'        |           | 34           | 415           |
|            | 39167479       | 1,04         |             |              |                | 5'-3'        |           | 16           | 586           |
|            | 42662880       | 2,35         | ZNF570      | 5'-3'        | 14             | 5'-3'        | no        | 25           | 414           |
|            | 55232947       | 1,97         | ZNF473      | 5'-3'        | 12             | 5'-3'        | no        | 29           | 288           |
|            | 6905898        | 1,78         |             |              |                | 3'-5'        |           | 45           | 290           |
|            | 12448350       | 2,45         | ZNF709      | 3'-5'        | 11             | 3'-5'        | no        | 31           | 454           |
|            | 20063051       | 2,135        |             |              |                | 3'-5'        |           | 40           | 311           |
|            | 22074797       | 2,16         |             |              |                | 3'-5'        |           | 46           | 442           |
|            | 33138981       | 2,67         |             |              |                | 3'-5'        |           | 37           | 388           |
|            | 33912708       | 2,095        |             |              |                | 3'-5'        |           | 20           | 403           |
|            | 37056396       | 2,405        |             |              |                | 3'-5'        |           | 27           | 395           |
|            | 40782685       | 1,945        |             |              |                | 3'-5'        |           | 18           | 425           |
|            | 46741488       | 2,055        |             |              |                | 3'-5'        |           | 50           | 395           |
|            | 49572256       | 1,86         |             |              |                | 3'-5'        |           | 18           | 442           |
|            | 51350386       | 1,995        | IGFL2       | 5'-3'        | 12             | 3'-5'        | ok        | 22           | 363           |
|            | 61764611       | 2,025        |             |              |                | 3'-5'        |           | 25           | 479           |

| Ø          |                 |              |                | 4            |             |              | 6  | 33,13     | 399,92     |
|------------|-----------------|--------------|----------------|--------------|-------------|--------------|----|-----------|------------|
|            |                 |              |                | 2            |             |              | 4  | 31,67     | 369,33     |
|            |                 |              |                | 6            |             |              | 2  | 33,61     | 410,11     |
| 20         | 88649           | 2,795        |                |              |             | 5'-3'        |    | 34        | 403        |
|            | 4441354         | 2,44         |                |              |             | 5'-3'        |    | 39        | 362        |
| 61 results | 4927768         | 2,565        | SLC23A2        | 3'-5'        | 1           | 5'-3'        | ok | 40        | 397        |
|            | 10156213        | 2,275        | SNAP25         | 5'-3'        | 1           | 5'-3'        | no | 24        | 419        |
|            | 14311468        | 2,655        | MACROD2        | 5'-3'        | 3           | 5'-3'        | no | 32        | 395        |
|            | <b>15432054</b> | <b>2,09</b>  | <b>MACROD2</b> | 5'-3'        | <b>  8</b>  | <b>5'-3'</b> | no | <b>49</b> | <b>426</b> |
|            | 16564689        | 2,12         |                |              |             | 5'-3'        |    | 20        | 408        |
|            | 21274366        | 2,865        | XRN2           | 5'-3'        | 16          | 5'-3'        | no | 35        | 407        |
|            | 25080266        | 1,975        |                |              |             | 5'-3'        |    | 49        | 449        |
|            | 31655305        | 1,725        | CBFA2T2        | 5'-3'        | 1           | 5'-3'        | no | 48        | 509        |
|            | 32788395        | 1,92         | NCOA6          | 3'-5'        | 12          | 5'-3'        | ok | 29        | 278        |
|            | 33087066        | 2,695        | TRPC4AP        | 3'-5'        | 7           | 5'-3'        | ok | 33        | 425        |
|            | 33714430        | 2,625        | DPNE1/RBM1:    | 3'-5'        | 1/  1       | 5'-3'        | ok | 38        | 389        |
|            | 36618656        | 1,885        | KIAA1219       | 5'-3'        | 22          | 5'-3'        | no | 50        | 361        |
|            | 37225861        | 1,855        |                |              |             | 5'-3'        |    | 26        | 295        |
|            | 37629536        | 2,21         |                |              |             | 5'-3'        |    | 25        | 376        |
|            | 37828758        | 2,225        |                |              |             | 5'-3'        |    | 23        | 419        |
|            | 38149987        | 2,76         |                |              |             | 5'-3'        |    | 33        | 412        |
|            | 40395332        | 2,685        | PTPRT          | 3'-5'        | 11          | 5'-3'        | ok | 32        | 401        |
|            | 40877846        | 2,07         | PTPRT          | 3'-5'        | 2           | 5'-3'        | ok | 36        | 560        |
|            | <b>49702519</b> | <b>1,875</b> | <b>ATP9A</b>   | <b>3'-5'</b> | <b>  14</b> | <b>5'-3'</b> | ok | <b>34</b> | <b>599</b> |
|            | 53194950        | 2,085        |                |              |             | 5'-3'        |    | 25        | 351        |
|            | 54313955        | 1,915        |                |              |             | 5'-3'        |    | 18        | 387        |
|            | 55354631        | 2,105        |                |              |             | 5'-3'        |    | 47        | 443        |
|            | 59455225        | 2,76         | CDH4           | 5'-3'        | 2           | 5'-3'        | no | 35        | 386        |
|            | 3056657         | 1,645        | UBOX5          | 3'-5'        | 1           | 3'-5'        | no | 18        | 333        |
|            | 5952345         | 1,865        | CRLS1          | 5'-3'        | 3           | 3'-5'        | ok | 41        | 551        |
|            | 6199943         | 1,86         |                |              |             | 3'-5'        |    | 28        | 542        |
|            | 7338999         | 2,32         |                |              |             | 3'-5'        |    | 25        | 420        |
|            | 7360163         | 2,75         |                |              |             | 3'-5'        |    | 33        | 404        |
|            | 8497721         | 2,35         | PLCB1          | 5'-3'        | 3           | 3'-5'        | ok | 45        | 414        |
|            | 8551552         | 2,345        | PLCB1          | 5'-3'        | 3           | 3'-5'        | ok | 42        | 373        |
|            | 9938478         | 2,425        |                |              |             | 3'-5'        |    | 30        | 369        |
|            | 11253886        | 1,78         |                |              |             | 3'-5'        |    | 51        | 350        |
|            | 11530514        | 2,365        |                |              |             | 3'-5'        |    | 38        | 337        |
|            | 12020524        | 2,36         |                |              |             | 3'-5'        |    | 27        | 386        |

|          |       |           |       |  |                   |       |    |           |               |
|----------|-------|-----------|-------|--|-------------------|-------|----|-----------|---------------|
| 12183596 | 2,675 |           |       |  |                   | 3'-5' |    | 33        | 389           |
| 13452242 | 1,98  | TASP1     | 3'-5' |  | 10                | 3'-5' | no | 21        | 448           |
| 16621073 | 1,81  |           |       |  |                   | 3'-5' |    | 30        | 572           |
| 19418653 | 1,715 | SLC24A3   | 5'-3' |  | 2                 | 3'-5' | ok | 52        | 347           |
| 20912270 | 1,955 |           |       |  |                   | 3'-5' |    | 46        | 335           |
| 29830068 | 1,8   | TPX2      | 5'-3' |  | 9 E 10   10       | 3'-5' | ok | 50        | 344           |
| 30854124 | 2,485 | DNMT3B    | 5'-3' |  | 20                | 3'-5' | ok | 42        | 417           |
| 31636928 | 1,81  | CBFA2T2   | 5'-3' |  | 1                 | 3'-5' | ok | 30        | 246           |
| 33679879 | 2,56  | CPNE1     | 3'-5' |  | 13                | 3'-5' | no | 41        | 406           |
| 36161961 | 2,645 |           |       |  |                   | 3'-5' |    | 38        | 425           |
| 37167993 | 2,03  |           |       |  |                   | 3'-5' |    | 28        | 508           |
| 39970882 | 2,05  |           |       |  |                   | 3'-5' |    | 22        | 374           |
| 42265519 | 2,585 | C20orf111 | 3'-5' |  | 2                 | 3'-5' | no | 36        | 457           |
| 42279313 | 1,35  |           |       |  |                   | 3'-5' |    | 18        | 274           |
| 42552121 | 2,44  | C20orf121 | 5'-3' |  | E 5               | 3'-5' | ok | 41        | 382           |
| 43069118 | 2,08  | STK4      | 5'-3' |  | 9                 | 3'-5' | ok | 38        | 280           |
| 46992758 | 2,425 | ARFGEF2   | 5'-3' |  | 3                 | 3'-5' | ok | 37        | 339           |
| 47929226 | 1,92  | SLC9A8    | 5'-3' |  | 12                | 3'-5' | ok | 16        | 408           |
| 49066004 | 2,605 | KCNG1     | 3'-5' |  | 1                 | 3'-5' | no | 31        | 395           |
| 50521157 | 2,41  |           |       |  |                   | 3'-5' |    | 32        | 472           |
| 50830801 | 2,055 |           |       |  |                   | 3'-5' |    | 31        | 285           |
| 51346036 | 2,07  | TSHZ2     | 5'-3' |  | 2                 | 3'-5' | ok | 19        | 408           |
| 55343801 | 2,34  | SPO11     | 5'-3' |  | 6 E 7   7 E 8   8 | 3'-5' | ok | 39        | 476           |
| 56239556 | 2,07  |           |       |  |                   | 3'-5' |    | 21        | 388           |
| 57271166 | 2,335 |           |       |  |                   | 3'-5' |    | 40        | 351           |
| <b>Ø</b> |       |           |       |  |                   |       |    | <b>32</b> | <b>33,84</b>  |
|          |       |           |       |  |                   |       |    | <b>12</b> | <b>36,06</b>  |
|          |       |           |       |  |                   |       |    | <b>20</b> | <b>31,38</b>  |
|          |       |           |       |  |                   |       |    |           | <b>401,02</b> |
|          |       |           |       |  |                   |       |    |           | <b>405,5</b>  |
|          |       |           |       |  |                   |       |    |           | <b>369,07</b> |

**21**  
32 results

|          |       |       |       |  |    |       |    |    |     |
|----------|-------|-------|-------|--|----|-------|----|----|-----|
| 16198805 | 1,985 |       |       |  |    | 5'-3' |    | 48 | 457 |
| 18614106 | 2,255 | PRSS7 | 3'-5' |  | 16 | 5'-3' | ok | 47 | 413 |
| 20923197 | 2,065 |       |       |  |    | 5'-3' |    | 50 | 421 |
| 21325923 | 2,475 | NCAM2 | 5'-3' |  | 1  | 5'-3' | no | 29 | 389 |
| 22466434 | 2,075 |       |       |  |    | 5'-3' |    | 50 | 419 |
| 23870733 | 2,375 |       |       |  |    | 5'-3' |    | 28 | 439 |
| 24104366 | 2,185 |       |       |  |    | 5'-3' |    | 39 | 311 |
| 25139835 | 2,09  |       |       |  |    | 5'-3' |    | 20 | 416 |
| 25645173 | 2,69  |       |       |  |    | 5'-3' |    | 37 | 392 |
| 33133929 | 2,335 |       |       |  |    | 5'-3' |    | 44 | 427 |
| 34095872 | 2,15  | ITSN1 | 5'-3' |  | 19 | 5'-3' | no | 21 | 404 |

|                 |                 |               |              |            |              |           |              |               |
|-----------------|-----------------|---------------|--------------|------------|--------------|-----------|--------------|---------------|
| 38566460        | 2,05            | C441964/KCN   | 5'-3'        | 14   2     | 5'-3'        | no        | 48           | 374           |
| 39471226        | 2,155           | DSCR2         | 3'-5'        | E 6   5    | 5'-3'        | ok        | 27           | 345           |
| 44297144        | 2,38            | TMEM1         | 5'-3'        | 14         | 5'-3'        | no        | 26           | 418           |
| 20361352        | 2,355           |               |              |            | 3'-5'        |           | 25           | 413           |
| 21311227        | 2,19            | NCAM2         | 5'-3'        | 11         | 3'-5'        | ok        | 48           | 402           |
| 21347316        | 1,72            | NCAM2         | 5'-3'        | 11         | 3'-5'        | ok        | 53           | 358           |
| 21909639        | 1,955           |               |              |            | 3'-5'        |           | 53           | 413           |
| <b>22052894</b> | <b>2,57</b>     |               |              |            | <b>3'-5'</b> |           | <b>39</b>    | <b>430</b>    |
| 22372281        | 1,865           |               |              |            | 3'-5'        |           | 50           | 461           |
| 23597818        | 1,68            |               |              |            | 3'-5'        |           | 16           | 458           |
| 24011561        | 2,385           |               |              |            | 3'-5'        |           | 42           | 437           |
| 26129879        | 1,745           |               |              |            | 3'-5'        |           | 50           | 333           |
| 26843730        | 2,39            | CYYR1         | 3'-5'        | 12         | 3'-5'        | no        | 33           | 332           |
| 29264635        | 2,08            | ZNF294        | 3'-5'        | 17 E 6   6 | 3'-5'        | no        | 40           | 518           |
| 29657226        | 1,675           |               |              |            | 3'-5'        |           | 47           | 289           |
| 33732920        | 1,51            |               |              |            | 3'-5'        |           | 54           | 326           |
| 34114333        | 2,34            | ITSN1         | 5'-3'        | 124        | 3'-5'        | ok        | 33           | 496           |
| 37584554        | 1,675           |               |              |            | 3'-5'        |           | 24           | 539           |
| 37744169        | 2,755           | DYRK1A        | 5'-3'        | 11         | 3'-5'        | ok        | 35           | 433           |
| 38467512        | 0,99            |               |              |            | 3'-5'        |           | 53           | 606           |
| 39076832        | 1,58            |               |              |            | 3'-5'        |           | 25           | 568           |
| <b>Ø</b>        |                 |               | <b>8</b>     |            |              | <b>12</b> | <b>38,56</b> | <b>419,91</b> |
|                 |                 |               | <b>4</b>     |            |              | <b>6</b>  | <b>36,67</b> | <b>406,83</b> |
|                 |                 |               | <b>12</b>    |            |              | <b>6</b>  | <b>39,7</b>  | <b>427,75</b> |
| <b>22</b>       | 14736033        |               |              | 1          | 5'-3'        |           | 41           | 485           |
| 24 results      | 15670554        | XKR3          | 3'-5'        | 11         | 5'-3'        | ok        | 38           | 393           |
|                 | 15734747        |               |              |            | 5'-3'        |           | 16           | 419           |
|                 | 15749500        |               |              |            | 5'-3'        |           | 41           | 400           |
|                 | 17247960        |               |              |            | 5'-3'        |           | 18           | 531           |
|                 | <b>20958063</b> |               |              |            | <b>5'-3'</b> |           | <b>32</b>    | <b>360</b>    |
|                 | 24856137        |               |              |            | 5'-3'        |           | 27           | 500           |
|                 | 32575351        | LARGE         | 3'-5'        | 12         | 5'-3'        | ok        | 37           | 402           |
|                 | 38623209        |               |              |            | 5'-3'        |           | 16           | 417           |
|                 | <b>40260955</b> | <b>POLR3H</b> | <b>3'-5'</b> | <b>12</b>  | <b>5'-3'</b> | ok        | <b>42</b>    | <b>332</b>    |
|                 | 42505199        | EFCAB6        | 3'-5'        | 13         | 5'-3'        | ok        | 33           | 370           |
|                 | 45598637        | TBC1D22A      | 5'-3'        | 14         | 5'-3'        | no        | 26           | 548           |
|                 | 46696436        |               |              |            | 5'-3'        |           | 47           | 390           |
|                 | 15040134        |               |              |            | 3'-5'        |           | 43           | 415           |
|                 | 15400519        |               |              |            | 3'-5'        |           | 32           | 360           |

|             |                 |             |              |              |           |              |          |              |               |
|-------------|-----------------|-------------|--------------|--------------|-----------|--------------|----------|--------------|---------------|
|             | 17830919        | 1,215       | UFD1L        | 3'-5'        | 15        | 3'-5'        | no       | 17           | 257           |
|             | 17937100        | 2,545       |              |              |           | 3'-5'        |          | 32           | 445           |
|             | 27204747        | 2,125       |              |              |           | 3'-5'        |          | 47           | 439           |
|             | <b>29941068</b> | <b>2,49</b> | <b>LIMK2</b> | <b>5'-3'</b> | <b>11</b> | <b>3'-5'</b> | ok       | <b>33</b>    | <b>466</b>    |
|             | 31919585        | 2,51        |              |              |           | 3'-5'        |          | 29           | 396           |
|             | 32726330        | 1,965       |              |              |           | 3'-5'        |          | 17           | 411           |
|             | 40179854        | 2,27        |              |              |           | 3'-5'        |          | 23           | 410           |
|             | 47780335        | 1,3         |              |              |           | 3'-5'        |          | 17           | 274           |
|             | 49159682        | 2,1         | SAPS2        | 5'-3'        | 12        | 3'-5'        | ok       | 22           | 434           |
| <b>∅</b>    |                 |             |              | <b>3</b>     |           |              | <b>8</b> | <b>30,25</b> | <b>410,58</b> |
|             |                 |             |              | <b>5</b>     |           |              | <b>2</b> | <b>31</b>    | <b>400,25</b> |
|             |                 |             |              | <b>8</b>     |           |              | <b>6</b> | <b>29,88</b> | <b>415,75</b> |
| <b>X</b>    | 4588098         | 2,03        |              |              | 1         | 5'-3'        |          | 39           | 280           |
|             | 4910921         | 2,08        |              |              |           | 5'-3'        |          | 28           | 320           |
| 204 results | 5366741         | 1,865       |              |              |           | 5'-3'        |          | 27           | 287           |
|             | 5383731         | 1,85        |              |              |           | 5'-3'        |          | 50           | 354           |
|             | 6077708         | 2,445       | NLGN4X       | 3'-5'        | 12        | 5'-3'        | ok       | 29           | 435           |
|             | 7002058         | 1,24        | HDHD1A       | 3'-5'        | 13        | 5'-3'        | ok       | 49           | 596           |
|             | 7307480         | 1,505       |              |              |           | 5'-3'        |          | 43           | 215           |
|             | 10986009        | 2,505       |              |              |           | 5'-3'        |          | 38           | 365           |
|             | 11157280        | 2,365       | ARHGAP6      | 3'-5'        | 13        | 5'-3'        | ok       | 29           | 451           |
|             | 14654252        | 2,38        | GLRA2        | 5'-3'        | 18        | 5'-3'        | no       | 41           | 370           |
|             | 17565670        | 1,505       | NHS          | 5'-3'        | 11        | 5'-3'        | no       | 27           | 215           |
|             | 17871683        | 2,3         |              |              |           | 5'-3'        |          | 45           | 394           |
|             | 18955972        | 2,785       | GPR64        | 3'-5'        | 19        | 5'-3'        | ok       | 36           | 401           |
|             | 19401455        | 2,255       | MAP3K15      | 3'-5'        | 11        | 5'-3'        | ok       | 47           | 405           |
|             | 22343326        | 1,955       |              |              |           | 5'-3'        |          | 18           | 395           |
|             | 22917325        | 2,505       |              |              |           | 5'-3'        |          | 42           | 405           |
|             | 22921869        | 1,845       |              |              |           | 5'-3'        |          | 16           | 425           |
|             | 24211742        | 1,73        |              |              |           | 5'-3'        |          | 30           | 588           |
|             | 24792401        | 2,505       | POLA1        | 5'-3'        | 134       | 5'-3'        | no       | 28           | 413           |
|             | 26280930        | 1,82        |              |              |           | 5'-3'        |          | 21           | 338           |
|             | 26325674        | 2,44        |              |              |           | 5'-3'        |          | 28           | 426           |
|             | 27286861        | 2,775       |              |              |           | 5'-3'        |          | 37           | 409           |
|             | 27611418        | 2,31        |              |              |           | 5'-3'        |          | 34           | 512           |
|             | 27848059        | 2,305       |              |              |           | 5'-3'        |          | 44           | 433           |
|             | 29059418        | 2,485       | IL1RAPL1     | 5'-3'        | 12        | 5'-3'        | no       | 35           | 487           |
|             | 29332298        | 2,44        | IL1RAPL1     | 5'-3'        | 15        | 5'-3'        | no       | 27           | 416           |
|             | 30023190        | 2,125       |              |              |           | 5'-3'        |          | 50           | 409           |

|          |       |         |       |      |       |    |    |     |
|----------|-------|---------|-------|------|-------|----|----|-----|
| 32384340 | 2,395 | DMD     | 3'-5' | 1 25 | 5'-3' | ok | 40 | 363 |
| 35989996 | 2,46  | CXorf59 | 5'-3' | 1 1  | 5'-3' | no | 43 | 412 |
| 37056924 | 2,315 |         |       |      | 5'-3' |    | 24 | 411 |
| 37405508 | 2,5   | LANCL3  | 5'-3' | 1 3  | 5'-3' | no | 31 | 374 |
| 38169538 | 2,745 |         |       |      | 5'-3' |    | 36 | 425 |
| 38274738 | 2,4   |         |       |      | 5'-3' |    | 36 | 494 |
| 40567988 | 2,435 |         |       |      | 5'-3' |    | 30 | 371 |
| 42161810 | 2,41  |         |       |      | 5'-3' |    | 27 | 396 |
| 42471124 | 2,28  |         |       |      | 5'-3' |    | 46 | 418 |
| 43193847 | 2,21  |         |       |      | 5'-3' |    | 24 | 432 |
| 43271194 | 1,77  |         |       |      | 5'-3' |    | 17 | 450 |
| 44986548 | 2,105 |         |       |      | 5'-3' |    | 21 | 423 |
| 48184424 | 1,875 |         |       |      | 5'-3' |    | 22 | 339 |
| 53222377 | 2,21  |         |       |      | 5'-3' |    | 29 | 482 |
| 53231413 | 2,305 |         |       |      | 5'-3' |    | 24 | 413 |
| 56125373 | 2,765 |         |       |      | 5'-3' |    | 36 | 421 |
| 65903906 | 2,055 |         |       |      | 5'-3' |    | 29 | 305 |
| 65911327 | 2,82  |         |       |      | 5'-3' |    | 34 | 408 |
| 66419150 | 2,19  |         |       |      | 5'-3' |    | 24 | 436 |
| 66500324 | 1,805 |         |       |      | 5'-3' |    | 33 | 603 |
| 66748710 | 2,48  | AR      | 5'-3' | 1 1  | 5'-3' | no | 28 | 418 |
| 66964082 | 1,855 |         |       |      | 5'-3' |    | 38 | 235 |
| 71231341 | 2,41  |         |       |      | 5'-3' |    | 38 | 346 |
| 74548902 | 2,42  | ZDHHC15 | 3'-5' | 1 10 | 5'-3' | ok | 42 | 388 |
| 79704930 | 1,92  |         |       |      | 5'-3' |    | 47 | 338 |
| 79992747 | 2,555 |         |       |      | 5'-3' |    | 39 | 433 |
| 80127980 | 2,245 |         |       |      | 5'-3' |    | 24 | 393 |
| 80744007 | 2,155 |         |       |      | 5'-3' |    | 49 | 413 |
| 81089894 | 2,025 |         |       |      | 5'-3' |    | 20 | 389 |
| 81242754 | 2,72  |         |       |      | 5'-3' |    | 38 | 410 |
| 83348188 | 1,51  |         |       |      | 5'-3' |    | 44 | 226 |
| 83691460 | 2,66  |         |       |      | 5'-3' |    | 37 | 432 |
| 84616419 | 1,955 |         |       |      | 5'-3' |    | 35 | 593 |
| 85550097 | 1,905 | DACH2   | 5'-3' | 1 2  | 5'-3' | no | 17 | 395 |
| 86285308 | 2,405 |         |       |      | 5'-3' |    | 26 | 413 |
| 86805359 | 2,64  | KLHL4   | 5'-3' | 1 9  | 5'-3' | no | 39 | 416 |
| 86880745 | 2,285 |         |       |      | 5'-3' |    | 43 | 447 |
| 86958016 | 2,825 |         |       |      | 5'-3' |    | 35 | 399 |
| 86971314 | 1,9   |         |       |      | 5'-3' |    | 21 | 464 |
| 87290844 | 2,11  |         |       |      | 5'-3' |    | 36 | 266 |



|                  |             |               |              |             |              |    |           |            |
|------------------|-------------|---------------|--------------|-------------|--------------|----|-----------|------------|
| 88638329         | 2,67        |               |              |             | 5'-3'        |    | 38        | 398        |
| 88989660         | 2,685       |               |              |             | 5'-3'        |    | 36        | 437        |
| 89297926         | 1,795       |               |              |             | 5'-3'        |    | 50        | 343        |
| 89711214         | 2,18        |               |              |             | 5'-3'        |    | 22        | 418        |
| 90674984         | 2,6         |               |              |             | 5'-3'        |    | 40        | 414        |
| 90758893         | 2,8         |               |              |             | 5'-3'        |    | 36        | 404        |
| 91022130         | 2,175       | PCDH11X       | 5'-3'        | 1 2         | 5'-3'        | no | 47        | 429        |
| 91921352         | 2,075       |               |              |             | 5'-3'        |    | 51        | 409        |
| 92781982         | 2,49        |               |              |             | 5'-3'        |    | 42        | 416        |
| 94357507         | 1,695       |               |              |             | 5'-3'        |    | 20        | 495        |
| 94684893         | 2,075       |               |              |             | 5'-3'        |    | 51        | 409        |
| 95370261         | 1,935       |               |              |             | 5'-3'        |    | 43        | 301        |
| 97579840         | 2,61        |               |              |             | 5'-3'        |    | 39        | 396        |
| 97749374         | 1,905       |               |              |             | 5'-3'        |    | 23        | 483        |
| 99346759         | 2,06        |               |              |             | 5'-3'        |    | 23        | 452        |
| 102964781        | 2,13        |               |              |             | 5'-3'        |    | 48        | 390        |
| 104856115        | 2,105       | IL1RAPL2      | 5'-3'        | 1 7         | 5'-3'        | no | 47        | 443        |
| 107255272        | 2,32        | ATG4A         | 5'-3'        | 1 1         | 5'-3'        | no | 46        | 410        |
| <b>107576770</b> | <b>2,13</b> | <b>COL4A5</b> | <b>5'-3'</b> | <b>1 1</b>  | <b>5'-3'</b> | no | <b>49</b> | <b>418</b> |
| 112702256        | 2,28        |               |              |             | 5'-3'        |    | 25        | 390        |
| 114147616        | 2,115       | IL13RA2       | 3'-5'        | 1 8         | 5'-3'        | ok | 32        | 531        |
| 116968544        | 2,135       | KLHL13        | 3'-5'        | 1 1         | 5'-3'        | ok | 23        | 437        |
| 117336879        | 2,715       |               |              |             | 5'-3'        |    | 38        | 411        |
| 117596667        | 1,915       | DOCK11        | 5'-3'        | 1 13        | 5'-3'        | no | 50        | 451        |
| 119460199        | 2,24        | LAMP2         | 3'-5'        | 1 7 E 7 1 6 | 5'-3'        | ok | 30        | 332        |
| 119842843        | 2,28        |               |              |             | 5'-3'        |    | 24        | 418        |
| 124263782        | 1,895       |               |              |             | 5'-3'        |    | 19        | 373        |
| 125821741        | 2,605       |               |              |             | 5'-3'        |    | 31        | 423        |
| 127331079        | 2,16        |               |              |             | 5'-3'        |    | 30        | 316        |
| 129201970        | 2,22        | SUHW3         | 3'-5'        | 1 5         | 5'-3'        | ok | 32        | 308        |
| 131004908        | 2,17        | RP6-213H19.1  | 5'-3'        | 1 1         | 5'-3'        | no | 26        | 358        |
| 131390623        | 1,89        | MBNL3         | 3'-5'        | 1 1         | 5'-3'        | ok | 34        | 596        |
| 132213299        | 2,455       |               |              |             | 5'-3'        |    | 37        | 473        |
| 134066260        | 2,625       |               |              |             | 5'-3'        |    | 35        | 359        |
| 135672121        | 2,035       | ARHGEF6       | 3'-5'        | 1 2         | 5'-3'        | ok | 47        | 361        |
| 136660381        | 2,6         |               |              |             | 5'-3'        |    | 37        | 374        |
| 136672365        | 2,615       |               |              |             | 5'-3'        |    | 40        | 411        |
| 136691497        | 2,18        |               |              |             | 5'-3'        |    | 47        | 428        |
| 141990441        | 2,44        |               |              |             | 5'-3'        |    | 39        | 456        |
| 142501349        | 2,19        |               |              |             | 5'-3'        |    | 39        | 506        |

|                 |             |            |              |                 |              |           |           |            |
|-----------------|-------------|------------|--------------|-----------------|--------------|-----------|-----------|------------|
| 144465787       | 2,52        |            |              |                 | 5'-3'        |           | 41        | 420        |
| 145219146       | 2,595       |            |              |                 | 5'-3'        |           | 30        | 415        |
| 146041299       | 1,39        |            |              |                 | 5'-3'        |           | 46        | 222        |
| 147188203       | 2,01        |            |              |                 | 5'-3'        |           | 50        | 386        |
| 150917939       | 2,54        |            |              |                 | 5'-3'        |           | 41        | 402        |
| 151731524       | 2,42        |            |              |                 | 5'-3'        |           | 38        | 470        |
| 153970538       | 2,535       | BRCC3      | 5'-3'        | 15 E 6   6      | 5'-3'        | no        | 37        | 361        |
| 154158422       | 2,565       | CLIC2      | 3'-5'        | E 6             | 5'-3'        | ok        | 32        | 441        |
| 6518655         | 1,935       |            |              |                 | 3'-5'        |           | 17        | 401        |
| 8103613         | 1,585       |            |              |                 | 3'-5'        |           | 19        | 507        |
| 10789640        | 2,44        |            |              |                 | 3'-5'        |           | 30        | 372        |
| 11104644        | 2,505       | ARHGAP6    | 3'-5'        | 19              | 3'-5'        | no        | 36        | 473        |
| 12428286        | 1,53        | FRMPD4     | 5'-3'        | 12              | 3'-5'        | ok        | 49        | 538        |
| 12841595        | 2,555       | TLR8       | 5'-3'        | 12              | 3'-5'        | ok        | 34        | 355        |
| 13160105        | 2,245       |            |              |                 | 3'-5'        |           | 30        | 333        |
| 14751107        | 1,555       |            |              |                 | 3'-5'        |           | 46        | 255        |
| 14994128        | 1,635       |            |              |                 | 3'-5'        |           | 47        | 281        |
| 15711854        | 1,175       | CA5B       | 5'-3'        | 18              | 3'-5'        | ok        | 20        | 599        |
| 20870323        | 2,425       |            |              |                 | 3'-5'        |           | 26        | 409        |
| 21364636        | 2,065       | CNKSR2     | 5'-3'        | 13              | 3'-5'        | ok        | 30        | 297        |
| 21445948        | 2,7         | CNKSR2     | 5'-3'        | 19              | 3'-5'        | ok        | 32        | 414        |
| 22226746        | 1,795       |            |              |                 | 3'-5'        |           | 21        | 333        |
| 24135446        | 2,465       | ZFX        | 5'-3'        | E 6   6 E 7   7 | 3'-5'        | ok        | 28        | 397        |
| 24620119        | 2,815       |            |              |                 | 3'-5'        |           | 34        | 411        |
| 24760205        | 1,475       | POLA1      | 5'-3'        | 132             | 3'-5'        | ok        | 26        | 219        |
| 26613136        | 2,345       |            |              |                 | 3'-5'        |           | 25        | 403        |
| 27203234        | 2,11        |            |              |                 | 3'-5'        |           | 39        | 296        |
| 28594646        | 1,66        | IL1RAPL1   | 5'-3'        | 11              | 3'-5'        | ok        | 21        | 512        |
| 30783652        | 2,01        | MAP3K7IP3  | 3'-5'        | 16              | 3'-5'        | no        | 44        | 326        |
| <b>31478206</b> | <b>2,86</b> | <b>DMD</b> | <b>3'-5'</b> | <b>155</b>      | <b>3'-5'</b> | <b>no</b> | <b>35</b> | <b>406</b> |
| 32377629        | 2,42        | DMD        | 3'-5'        | 126             | 3'-5'        | no        | 32        | 348        |
| 34381495        | 2,62        |            |              |                 | 3'-5'        |           | 38        | 430        |
| 35170414        | 2,565       |            |              |                 | 3'-5'        |           | 34        | 461        |
| 35648900        | 2,665       |            |              |                 | 3'-5'        |           | 36        | 377        |
| 37054296        | 2,135       |            |              |                 | 3'-5'        |           | 22        | 427        |
| 41332570        | 1,895       | CASK       | 3'-5'        | 113             | 3'-5'        | no        | 50        | 363        |
| 42703432        | 2,585       |            |              |                 | 3'-5'        |           | 34        | 457        |
| 42926733        | 1,505       |            |              |                 | 3'-5'        |           | 54        | 493        |
| 44772541        | 2,3         | UTX        | 5'-3'        | 17              | 3'-5'        | ok        | 38        | 324        |
| 44999074        | 2,02        |            |              |                 | 3'-5'        |           | 42        | 308        |

|           |       |        |       |      |       |    |    |     |
|-----------|-------|--------|-------|------|-------|----|----|-----|
| 45410277  | 1,995 |        |       |      | 3'-5' |    | 22 | 455 |
| 46075013  | 1,73  |        |       |      | 3'-5' |    | 24 | 290 |
| 46412208  | 2,06  | SLC9A7 | 3'-5' | 1 5  | 3'-5' | no | 51 | 406 |
| 47538224  | 2,02  |        |       |      | 3'-5' |    | 20 | 430 |
| 51610796  | 1,765 | MAGED1 | 5'-3' | 1 1  | 3'-5' | ok | 19 | 347 |
| 53806283  | 1,99  |        |       |      | 3'-5' |    | 45 | 486 |
| 55171752  | 1,64  |        |       |      | 3'-5' |    | 28 | 586 |
| 57209240  | 2,245 |        |       |      | 3'-5' |    | 27 | 455 |
| 63926455  | 1,995 |        |       |      | 3'-5' |    | 27 | 505 |
| 64719237  | 1,24  |        |       |      | 3'-5' |    | 18 | 252 |
| 66028984  | 1,75  |        |       |      | 3'-5' |    | 18 | 354 |
| 68914660  | 1,925 | EDA    | 5'-3' | 1 1  | 3'-5' | ok | 48 | 349 |
| 69945374  | 2,635 | TEX11  | 3'-5' | 1 9  | 3'-5' | no | 39 | 417 |
| 75074279  | 1,905 |        |       |      | 3'-5' |    | 45 | 503 |
| 77763548  | 2,23  |        |       |      | 3'-5' |    | 44 | 448 |
| 78846828  | 2,535 |        |       |      | 3'-5' |    | 38 | 447 |
| 79720964  | 2,62  |        |       |      | 3'-5' |    | 40 | 410 |
| 81363970  | 2,465 |        |       |      | 3'-5' |    | 42 | 397 |
| 81408995  | 1,96  |        |       |      | 3'-5' |    | 50 | 442 |
| 82738449  | 2,245 |        |       |      | 3'-5' |    | 45 | 435 |
| 82859065  | 2,2   |        |       |      | 3'-5' |    | 38 | 514 |
| 84524616  | 2,29  |        |       |      | 3'-5' |    | 35 | 292 |
| 85119624  | 2,41  | CHM    | 3'-5' | 1 4  | 3'-5' | no | 28 | 386 |
| 86574297  | 2,555 |        |       |      | 3'-5' |    | 35 | 473 |
| 86613650  | 2,68  |        |       |      | 3'-5' |    | 32 | 400 |
| 89656302  | 2,22  |        |       |      | 3'-5' |    | 47 | 398 |
| 89724206  | 1,885 |        |       |      | 3'-5' |    | 46 | 321 |
| 92027378  | 2,1   |        |       |      | 3'-5' |    | 22 | 434 |
| 92651819  | 2,025 |        |       |      | 3'-5' |    | 20 | 429 |
| 92690008  | 2,21  |        |       |      | 3'-5' |    | 48 | 406 |
| 93232226  | 2,25  |        |       |      | 3'-5' |    | 29 | 344 |
| 93452634  | 2,08  |        |       |      | 3'-5' |    | 49 | 390 |
| 96187940  | 1,74  | DIAPH2 | 5'-3' | 1 17 | 3'-5' | ok | 16 | 372 |
| 98469530  | 2,505 |        |       |      | 3'-5' |    | 33 | 463 |
| 99524999  | 2,765 | PCDH19 | 3'-5' | 1 2  | 3'-5' | no | 33 | 411 |
| 99790073  | 2,735 | SRPX2  | 5'-3' | 1 2  | 3'-5' | ok | 35 | 437 |
| 101054058 | 2,265 | ZMAT1  | 3'-5' | 1 1  | 3'-5' | no | 44 | 377 |
| 109040396 | 2,2   |        |       |      | 3'-5' |    | 30 | 324 |
| 111760993 | 2,12  | LHFPL1 | 3'-5' | E 4  | 3'-5' | no | 21 | 420 |
| 112748373 | 2,18  |        |       |      | 3'-5' |    | 38 | 518 |

|            |           |       |           |           |      |       |           |               |
|------------|-----------|-------|-----------|-----------|------|-------|-----------|---------------|
|            | 112933601 | 2,315 |           | 3'-5'     |      |       | 24        | 407           |
|            | 113271180 | 1,475 |           | 3'-5'     |      |       | 52        | 299           |
|            | 115684215 | 2,325 |           | 3'-5'     |      |       | 25        | 399           |
|            | 120969372 | 1,61  |           | 3'-5'     |      |       | 27        | 582           |
|            | 121963495 | 2,275 |           | 3'-5'     |      |       | 29        | 349           |
|            | 122978733 | 1,7   | STAG2     | 3'-5'     | 1 1  | no    | 24        | 284           |
|            | 123511626 | 2,375 | ODZ1      | 3'-5'     | 1 14 | no    | 26        | 399           |
|            | 123746573 | 1,805 | ODZ1      | 3'-5'     | 1 3  | no    | 50        | 345           |
|            | 130156170 | 2,09  |           | 3'-5'     |      |       | 30        | 516           |
|            | 131114752 | 2,635 |           | 3'-5'     |      |       | 31        | 401           |
|            | 132159648 | 2,3   |           | 3'-5'     |      |       | 46        | 404           |
|            | 139216756 | 2,16  |           | 3'-5'     |      |       | 46        | 376           |
|            | 142608874 | 1,995 |           | 3'-5'     |      |       | 47        | 353           |
|            | 142639759 | 2,745 |           | 3'-5'     |      |       | 37        | 403           |
|            | 146920576 | 1,92  |           | 3'-5'     |      |       | 42        | 288           |
|            | 150295637 | 2,01  |           | 3'-5'     |      |       | 18        | 406           |
|            | 153858093 | 2,015 | F8        | 3'-5'     | 1 6  |       | 18        | 407           |
| <b>Ø</b>   |           |       |           | <b>30</b> |      |       | <b>58</b> | <b>34,47</b>  |
|            |           |       |           | <b>29</b> |      |       | <b>31</b> | <b>34,69</b>  |
|            |           |       |           | <b>59</b> |      |       | <b>27</b> | <b>34,37</b>  |
|            |           |       |           |           |      |       |           | <b>403,4</b>  |
|            |           |       |           |           |      |       |           | <b>402,69</b> |
|            |           |       |           |           |      |       |           | <b>403,69</b> |
| <b>Y</b>   | 2857890   | 2,355 |           |           | 1    | 5'-3' | 42        | 443           |
|            | 2940326   | 2,675 |           |           |      | 5'-3' | 34        | 439           |
| 56 results | 3080590   | 2,69  |           |           |      | 5'-3' | 38        | 402           |
|            | 3430850   | 2,685 |           |           |      | 5'-3' | 36        | 437           |
|            | 4075373   | 2,21  |           |           |      | 5'-3' | 22        | 412           |
|            | 4784858   | 2,82  |           |           |      | 5'-3' | 36        | 408           |
|            | 5029955   | 2,175 | LOC730420 | 5'-3'     | 1 2  | 5'-3' | 47        | 429           |
|            | 5692219   | 2,455 |           |           |      | 5'-3' | 39        | 365           |
|            | 5824374   | 2,075 |           |           |      | 5'-3' | 51        | 409           |
|            | 7521671   | 2,485 |           |           |      | 5'-3' | 38        | 457           |
|            | 7806566   | 2,11  |           |           |      | 5'-3' | 35        | 256           |
|            | 8094390   | 1,965 |           |           |      | 5'-3' | 20        | 441           |
|            | 9127015   | 2,105 |           |           |      | 5'-3' | 45        | 355           |
|            | 10126071  | 2,54  |           |           |      | 5'-3' | 29        | 402           |
|            | 14671927  | 1,975 |           |           |      | 5'-3' | 19        | 429           |
|            | 15220195  | 2,32  | NLGN4Y    | 5'-3'     | 1 1  | no    | 38        | 490           |
|            | 15328014  | 2,135 | NLGN4Y    | 5'-3'     | 1 2  | no    | 48        | 427           |
|            | 16807184  | 1,925 |           |           |      | 5'-3' | 21        | 459           |
|            | 17672089  | 2,255 |           |           |      | 5'-3' | 43        | 365           |

|          |       |             |       |     |       |    |    |       |        |
|----------|-------|-------------|-------|-----|-------|----|----|-------|--------|
| 18551493 | 2,285 |             |       |     | 5'-3' |    | 46 | 401   |        |
| 19167324 | 2,23  |             |       |     | 5'-3' |    | 43 | 458   |        |
| 19488081 | 1,645 |             |       |     | 5'-3' |    | 21 | 303   |        |
| 19638623 | 2,345 |             |       |     | 5'-3' |    | 37 | 495   |        |
| 19969671 | 2,53  |             |       |     | 5'-3' |    | 35 | 478   |        |
| 20617431 | 2,295 |             |       |     | 5'-3' |    | 42 | 363   |        |
| 21912483 | 1,83  |             |       |     | 5'-3' |    | 20 | 468   |        |
| 22262525 | 2,41  |             |       |     | 5'-3' |    | 44 | 406   |        |
| 23879322 | 1,565 |             |       |     | 5'-3' |    | 49 | 531   |        |
| 24654370 | 2,285 |             |       |     | 5'-3' |    | 46 | 401   |        |
| 25494994 | 1,565 |             |       |     | 5'-3' |    | 49 | 531   |        |
| 26057979 | 0,96  |             |       |     | 5'-3' |    | 16 | 602   |        |
| 4020462  | 2,215 |             |       |     | 3'-5' |    | 47 | 397   |        |
| 4088336  | 1,87  |             |       |     | 3'-5' |    | 46 | 318   |        |
| 5930431  | 2,035 |             |       |     | 3'-5' |    | 22 | 371   |        |
| 6410963  | 2,535 |             |       |     | 3'-5' |    | 29 | 401   |        |
| 9069971  | 2,41  |             |       |     | 3'-5' |    | 44 | 406   |        |
| 10448344 | 1,895 |             |       |     | 3'-5' |    | 20 | 455   |        |
| 13779150 | 2,325 |             |       |     | 3'-5' |    | 44 | 389   |        |
| 13820601 | 2,24  |             |       |     | 3'-5' |    | 23 | 416   |        |
| 14612727 | 1,975 |             |       |     | 3'-5' |    | 19 | 429   |        |
| 15187843 | 2,66  | NLGN4Y      | 5'-3' | I 1 | 3'-5' | ok | 31 | 406   |        |
| 16544203 | 1,945 |             |       |     | 3'-5' |    | 53 | 403   |        |
| 16705962 | 1,76  |             |       |     | 3'-5' |    | 50 | 336   |        |
| 17020082 | 1,93  |             |       |     | 3'-5' |    | 21 | 458   |        |
| 18596410 | 2,285 |             |       |     | 3'-5' |    | 46 | 401   |        |
| 19074240 | 1,645 |             |       |     | 3'-5' |    | 21 | 303   |        |
| 19395006 | 2,23  | HSFY1/HSFY2 | 3'-5' | E 1 | 3'-5' | no | 43 | 458   |        |
| 21870942 | 1,65  |             |       |     | 3'-5' |    | 54 | 464   |        |
| 22204183 | 2,105 |             |       |     | 3'-5' |    | 45 | 355   |        |
| 22309814 | 2,55  |             |       |     | 3'-5' |    | 29 | 404   |        |
| 22831600 | 2,345 |             |       |     | 3'-5' |    | 31 | 475   |        |
| 23295332 | 2,425 |             |       |     | 3'-5' |    | 38 | 469   |        |
| 23651823 | 1,565 |             |       |     | 3'-5' |    | 49 | 531   |        |
| 24722612 | 0,96  |             |       |     | 3'-5' |    | 16 | 602   |        |
| 25285568 | 1,565 |             |       |     | 3'-5' |    | 49 | 531   |        |
| 26126212 | 2,285 |             |       |     | 3'-5' |    | 46 | 401   |        |
| Ø        |       |             | 4     |     |       |    | 4  | 36,52 | 425,73 |
|          |       |             | 1     |     |       |    | 3  | 41,4  | 442    |
|          |       |             | 5     |     |       |    | 1  | 36,04 | 424,14 |

## Supplementary Material S2: Putative ncRNAs sequences.

### NF1

CCAGTGTTATGTTTACCAAAAATGTTTGAGTGAGTCTTCTCTTTGTCTTTCTCTTTTTTAA  
AAAATTCAGGCTCTGCTGGTTCTTCATCAGTTAGATAGCATTGATTTGTGGAATCCTGATG  
CTCCTGTAGAAACATTTTGGGAGATTAGGTATATGTACTTTTATTTTTTAAATTCAACTTTT  
AAATTTTATTTTGTATTTTGTCTTGAAATATTAACCTGTAGTACTTAGTACATTGTAAAA  
CTTACACTTCCAAGGTTTTATGGTTTTGTATTTTATTTGACTTCAAATTATTAGAATTTCTT  
GTTTTAACTGTAAGAAAAGTATCACAGCAATTTAGAAAATAAATTTTAAAGAATAGTGCTA  
AATTTTGT**TCACCCTAAC**ATAAGTACTGTTGTTTGGT**ATATTA**CTTTTTTCAGATTTCAATG  
TGGTACTACTGTATTTTTAATAGATTTTCATAGTTATAAGCCTA

### PARK2

CCAGCATGATATTTGGCATCTCACTGGGATGCAAAAGGGAACATTATTTGCTGCTGCGT  
GCCATTAGTGCCAGAAACATTTTTTCATAAAATGAAGAGTGCAGCTCCACTAATCTATTAG  
TCCTAAGCCATTTTAGATCATACCATTGATTAACATAAAATATTTTTTTTTTCAAATGACGGCT  
GATGACAGAGCA**CTACCTTAAAAGTCAA**AGA**ACTATAAA**TTAAACATGAATCCAGTTAC  
CATGTTCTGTCAAAACAAGAAATACATGCGTGTGTTTGTGTCCTTTATATGGGCCAACAT  
A

### TNC

ACATATTTTCTATTTGGTCATTTAAGGAAATGTTTACTGATCCCTTCCAGTCAACCTTAC  
TAAATTTTTATACTTACTTTCCAG**TCACCTTAAC**CTAACAAGGTGGATATTATCATACTTG  
TGTA**TATAG**AGATTGAAGCAGAAAAAAAATCATCTAGTAAGTTCCCTCCAAAAACA  
TAATG

### Runx2

TCGGGTCATATAAGGCTTGCCTTGTACACCTTACCCTTGACTAGAATCAATGAGAAAT  
AACTTTGGCCACCTCTGTGTACTGAATAATCTTTTAGAAACATGTAGGATGAAGTGAGATA  
ATGTATAAAATCACCTGGGGATAGGAGTGCTACTTAAATACAGATTATTATATGATGAGG  
CCATATGTATCAATGTAAGTATGGTAGGAAAGGAGGTGTCTTCTGCACTGTAACATCACTA  
GACTGGTTTCTGAGACTAGTGTGCTGACTTTTATAATTCAACTGAATATGATTCAAACCTCA**TT**  
**ACCATAAC**ATACACCTGTTAGTCAATTACATGGCAATAACTTCTCATTCAATTACAACT**T**  
**ATA**TGTGCTCTTGTTGTTCCATTACAATATTTAAGGCTACCCAATGTTAAGGAAATATTTT  
CTGAATCATTGTATTTGTACCTCTGAACCTTGAAGACG

### NDUFS4

AGTGTCAAGGGAAACCATGCTCATGACTTCTCTTTTTATTTGACATTTAAAAGGGAAATG  
AAAAAACTAAGGAGATAACAGGTAGGCTTTTATCTTCAGAATAGTCCCTGAATTGATATA  
CAAATAATCAACTGTATCTCAAATACAATTGATAACAAATTGTATTTGATAATTGATATAC  
AAATCAAATAACTGTCAAAGCTAATATACTTTTAGGCTGCATTAATATAAAATACAATTT  
GATAAGTGATACATAAATCATCTTTTGTGTAGGTATGTGGCAGTTTT**ACCCTAAC**TTCTTA  
TTTCTAGATACTACTGAAAGGCAAGCATTAAATGCCATAAACGT**ATA**ACCTTTGTATATT

**TTACTATTAACACAGAATCAGCTGTATTAACAAAACTCATTTCCTATACAGCATATG**  
**AGTAAGGCACTGGGCTAGA**

In red: PSE

In blue: TATA box

The primers are underlined

© 2012 by the authors; licensee MDPI, Basel, Switzerland. This article is an open access article distributed under the terms and conditions of the Creative Commons Attribution license (<http://creativecommons.org/licenses/by/3.0/>).
